# Supplementary material for: The ontogeny of elements: distinct ontogenetic patterns in the radular tooth mineralization of gastropods
Source: PubMed Central journal article supplement (PMC9715475; doi:10.1007/s00114-022-01829-2), 2022-12-01
Supplement: 114_2022_1829_MOESM1_ESM.pdf [file 114_2022_1829_MOESM1_ESM.pdf]

## The ontogeny of elements: Distinct ontogenetic patterns in the radular tooth mineralization of gastropods

Jan-Ole Brütt<sup>1,2</sup>, Stanislav N. Gorb<sup>3</sup>, Wencke Krings<sup>1,2,3\*</sup>

<sup>1</sup> Department of Behavioral Biology, Institute of Cell and Systems Biology of Animals, Universität Hamburg, Martin-Luther-King-Platz 3, 20146 Hamburg, Germany

<sup>2</sup> Department of Mammalogy and Palaeoanthropology, Leibniz Institute for the Analysis of Biodiversity Change, Martin-Luther-King-Platz 3, 20146 Hamburg, Germany

<sup>3</sup> Department of Functional Morphology and Biomechanics, Zoological Institute, Christian-Albrechts-Universität zu Kiel, Am Botanischen Garten 9, 24118 Kiel, Germany

\*corresponding author: wencke.krings@uni-hamburg.de

### Supplementary

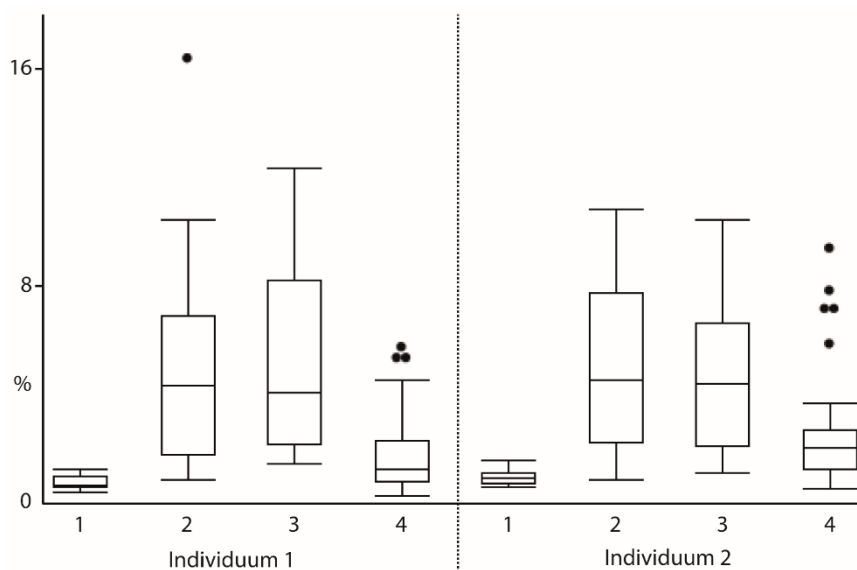

**Supplementary Figure 1.** *Vittina turrita*, proportions of all elements in atomic percent for each zone (zone 1 = building zone, zone 2 and 3 = maturation zone, zone 4 = working zone) per individual studied. For Kruskal-Wallis test and pairwise comparison by Wilcoxon method, see Supplementary Table 1.

**Supplementary Table 1.** Results from Kruskal-Wallis test and pairwise comparison by Wilcoxon method (red p-values = significant, black = not significant) for the proportions of all elements between the ontogenetic zones of the two individual radulae studied in *Vittina turrita*.

| Species                | Element      | Individual 1 | Individual 2 | 1-Way Test. ChiSquare approximation |    |         | Wilcoxon method |
|------------------------|--------------|--------------|--------------|-------------------------------------|----|---------|-----------------|
|                        |              |              |              | ChiSquare                           | df | p-value | p-value         |
| <i>Vittina turrita</i> | All elements | Zone 1       | Zone 1       | 1.2475                              | 1  | 0.2640  | 0.2783          |
|                        |              | Zone 2       | Zone 2       | 0.3308                              | 1  | 0.5652  | 0.5732          |
|                        |              | Zone 3       | Zone 3       | 0.0833                              | 1  | 0.7728  | 0.7950          |
|                        |              | Zone 4       | Zone 4       | 4.0029                              | 1  | 0.0454* | 0.0462*         |

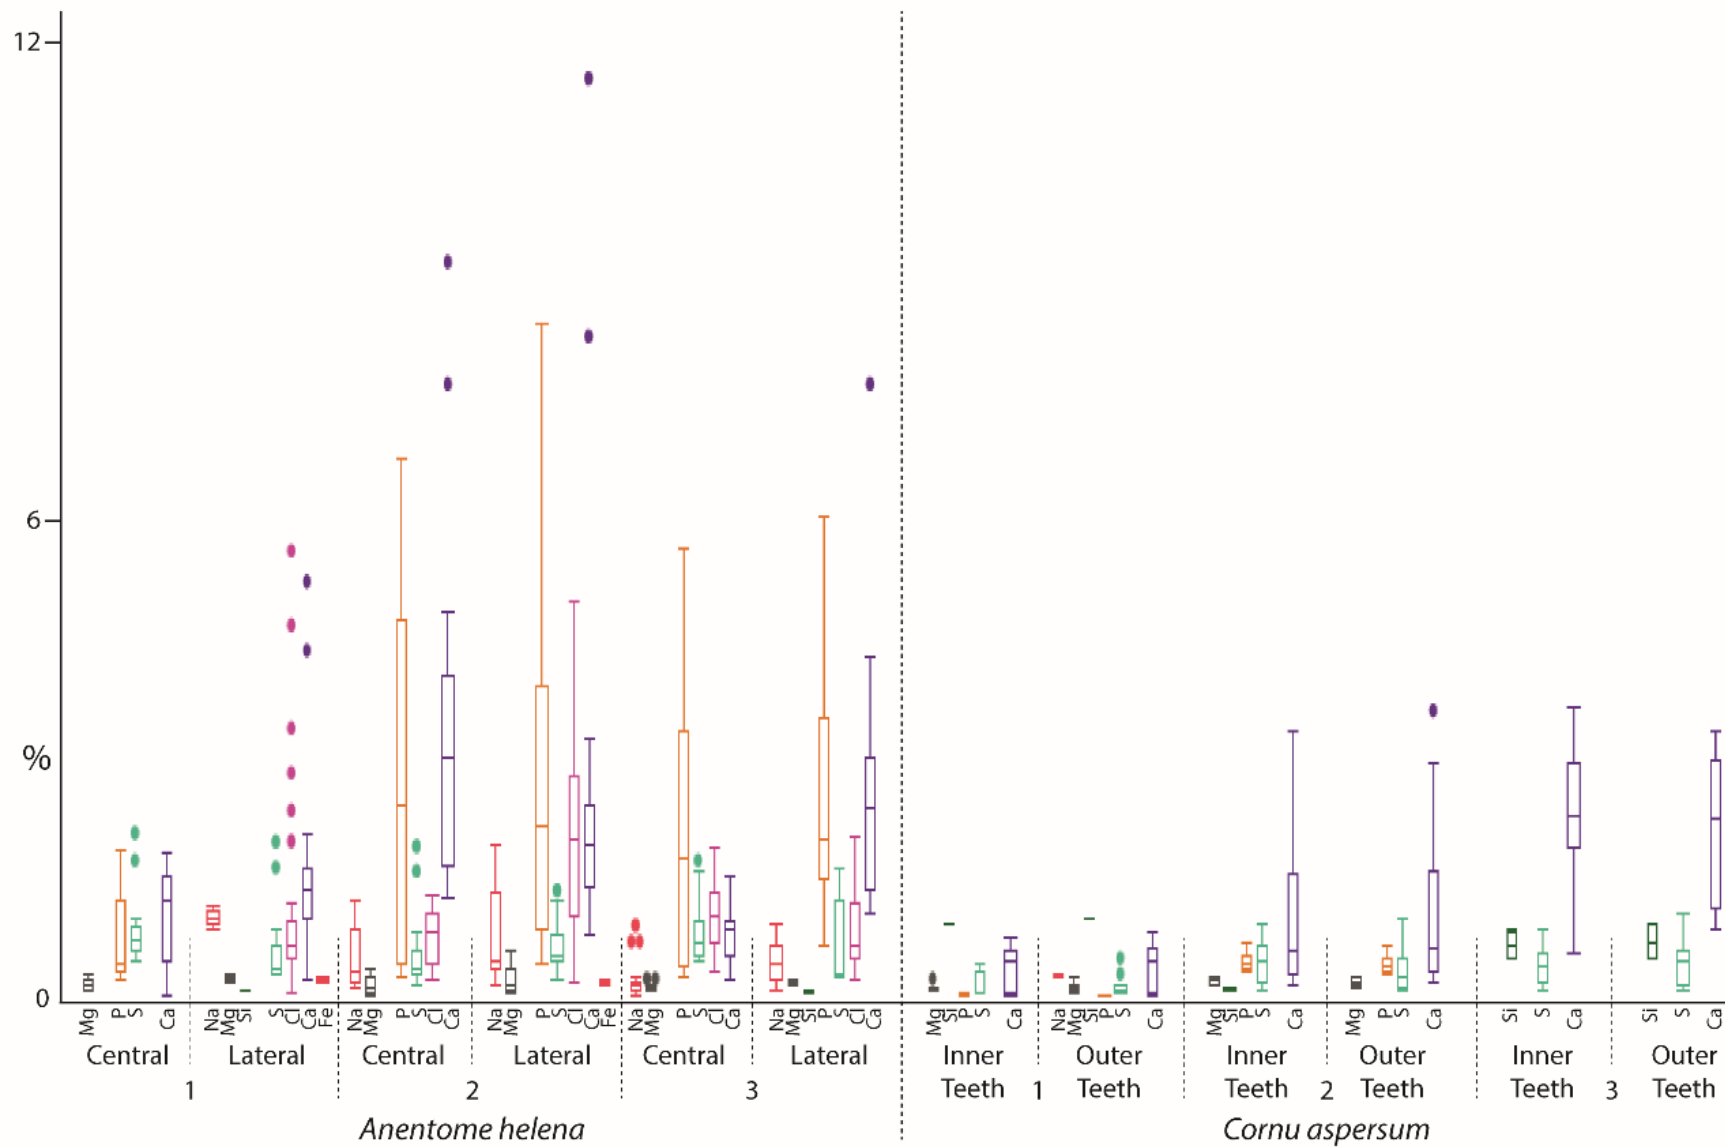

**Supplementary Figure 2.** *Anentome helena* and *Cornu aspersum*, proportions of all elements in atomic percent for each zone (zone 1 = building zone, zone 2 = maturation zone, zone 3 = working zone) and tooth type. Supplementary Figures 2, 3, and 4 are scaled identically to ease comparison. For values and quantity of measurements, see Supplementary Table 2.

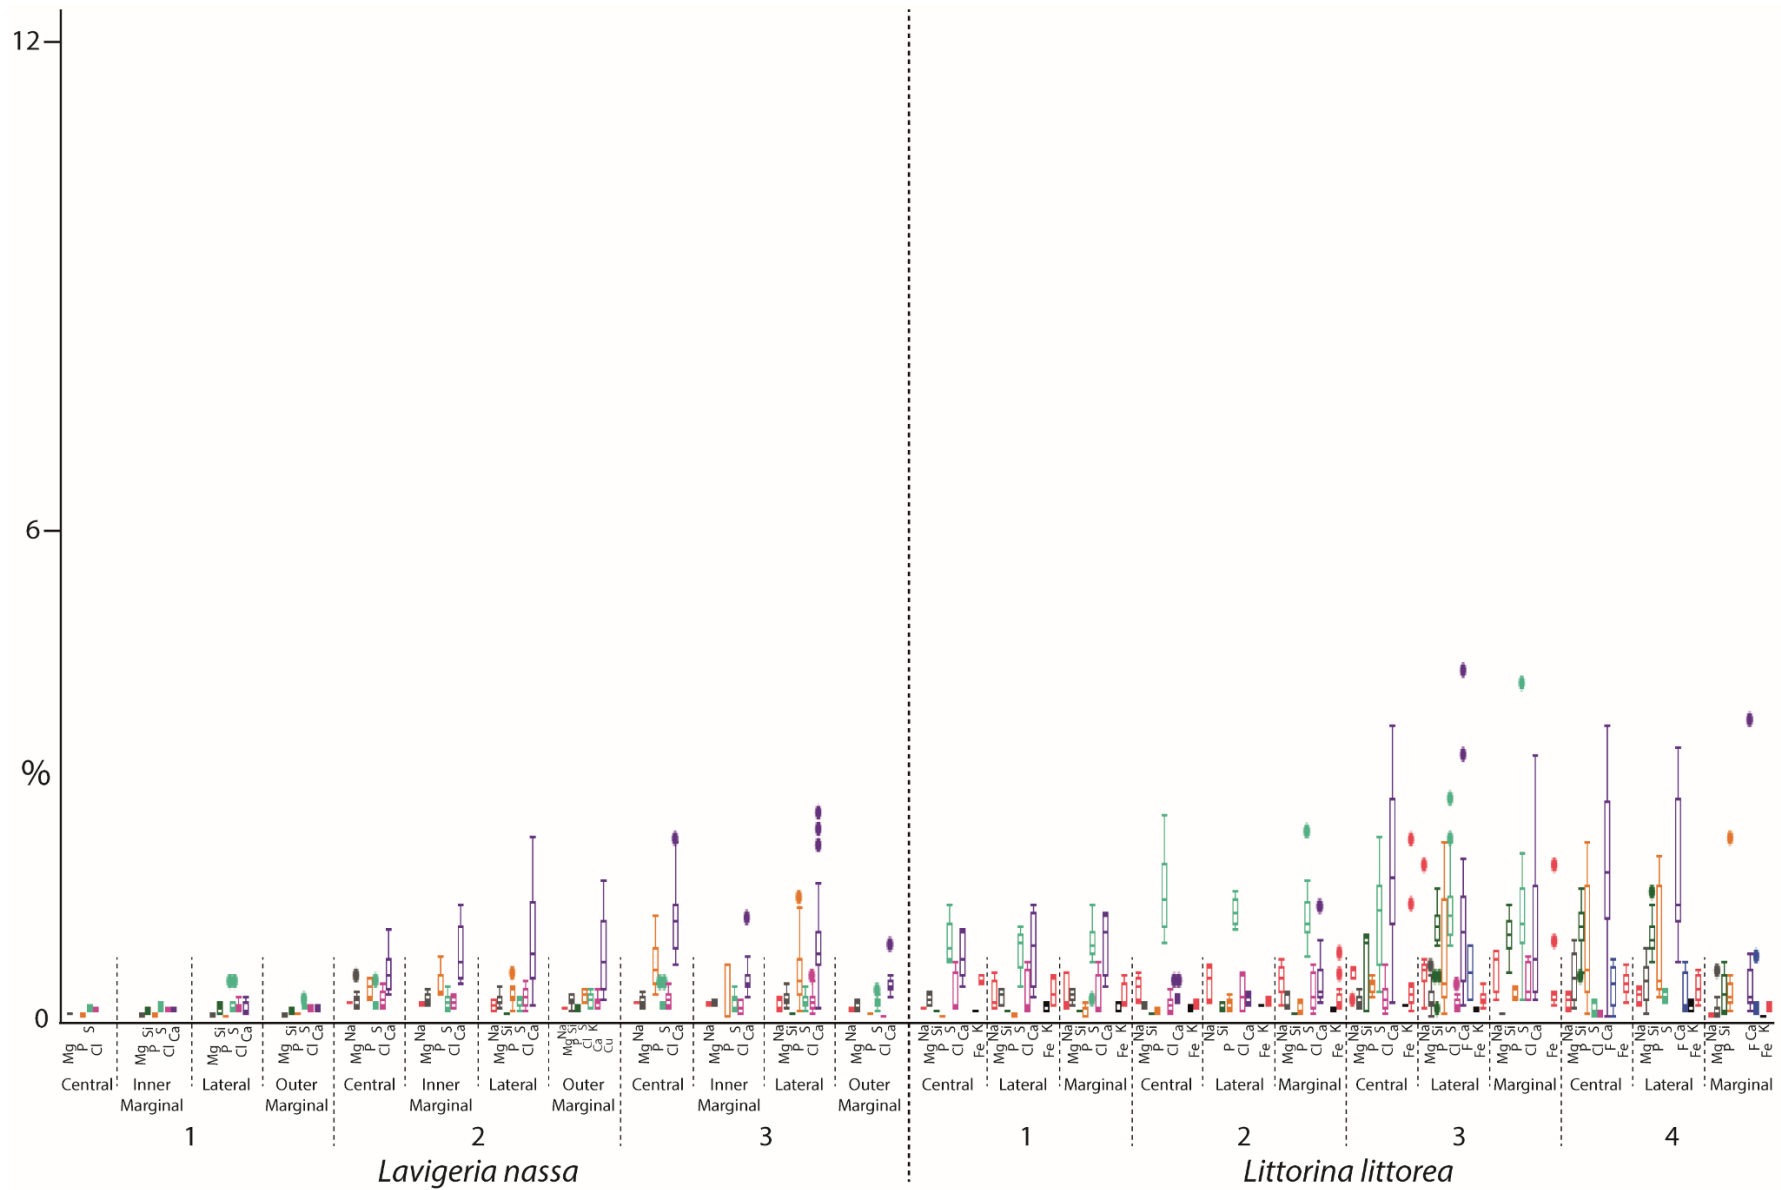

**Supplementary Figure 3.** *Lavigeria nassa* and *Littorina littorea*, proportions of all elements in atomic percent for each zone and tooth type. Supplementary Figures 2, 3, and 4 are scaled identically to ease comparison. For values and quantity of measurements, see Supplementary Table 2.

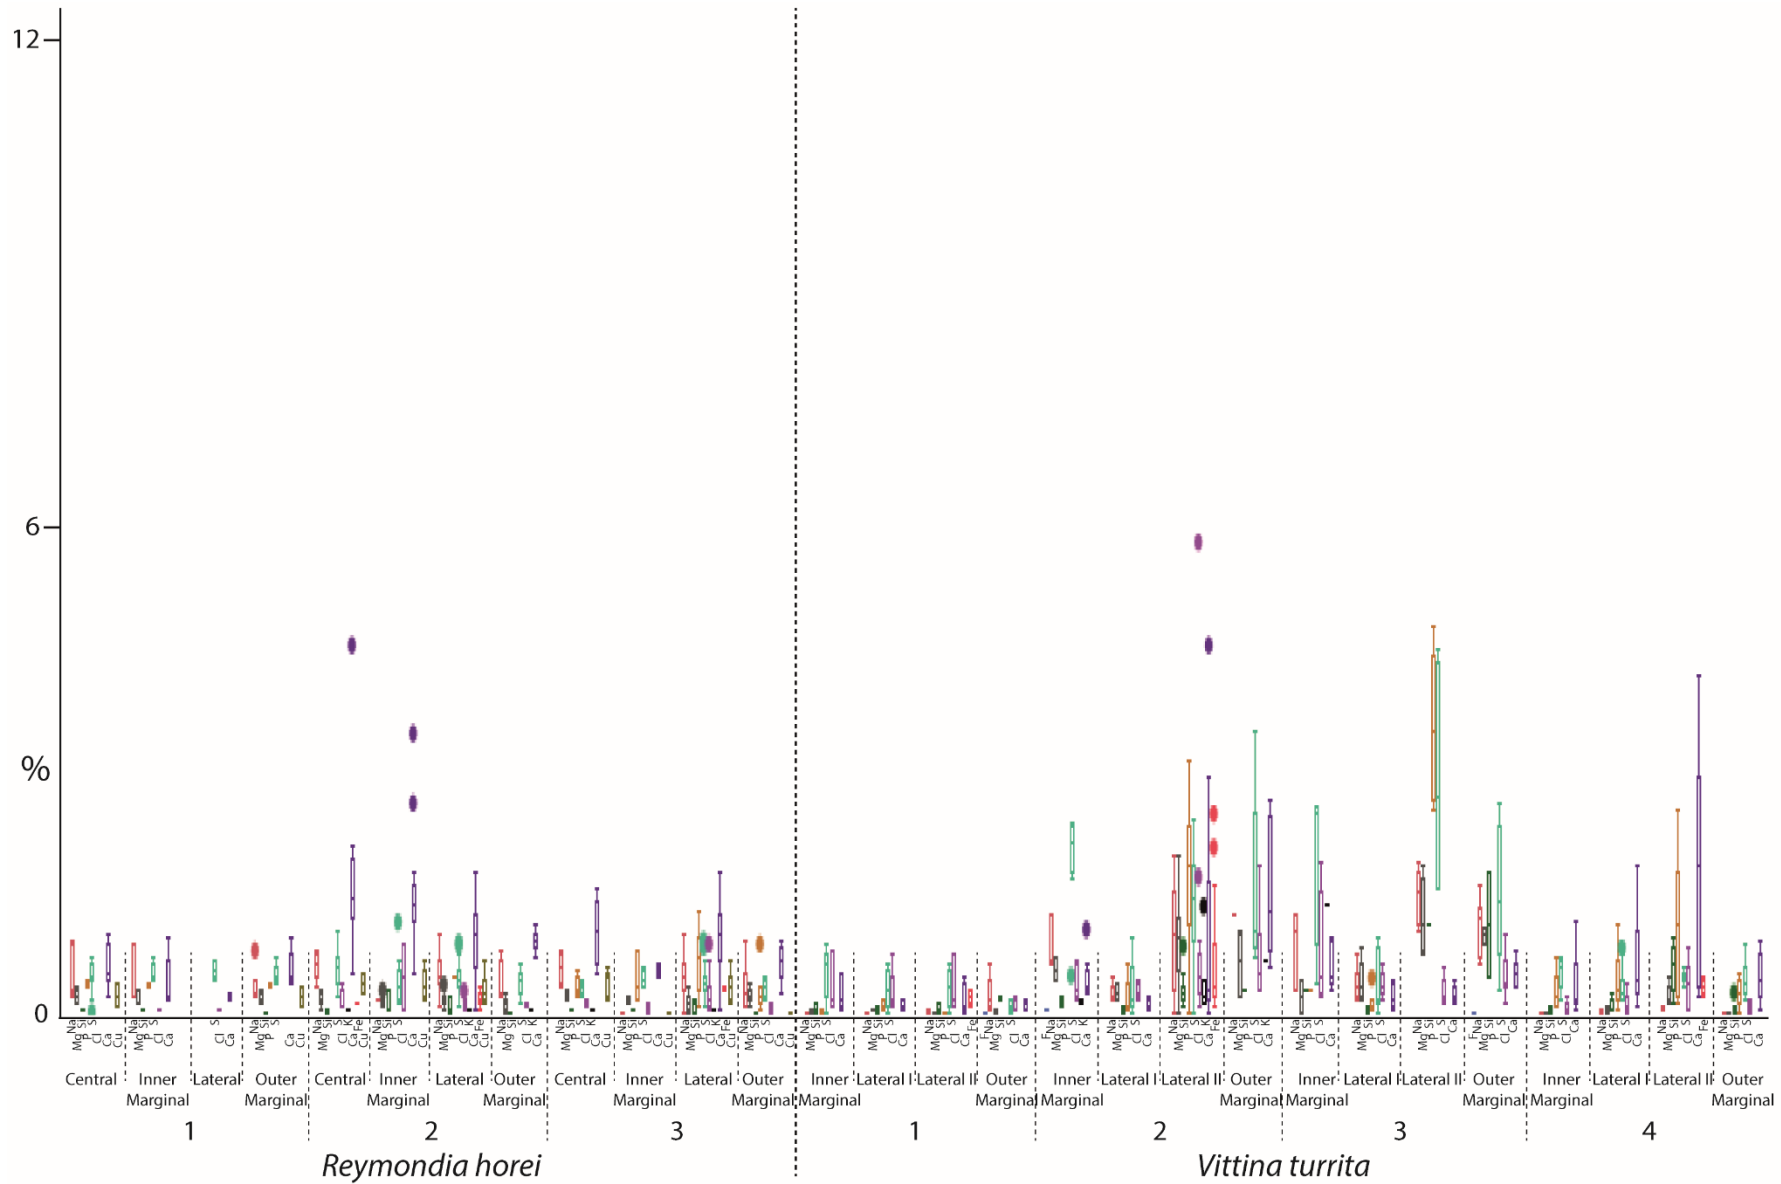

**Supplementary Figure 4.** *Reymondia horei* and *Vittina turrita*, proportions of all elements in atomic percent for each zone and tooth type. Supplementary Figures 2, 3, and 4 are scaled identically to ease comparison. For values and quantity of measurements, see Supplementary Table 2.





**Supplementary Table 3.** Results from Kruskal-Wallis test and pairwise comparison by Wilcoxon method (orange and red p-values = significant or highly significant) for the proportions of F, Na, Mg, Si, P, S, Cl, K, Ca, Fe, Cu, and all elements pooled together between the ontogenetic zones for each species.

| Species                | Element | Zone | Zone    | 1-Way Test. ChiSquare approximation |         |         | Wilcoxon method |
|------------------------|---------|------|---------|-------------------------------------|---------|---------|-----------------|
|                        |         |      |         | ChiSquare                           | df      | p-value | p-value         |
| <i>Anentome helena</i> | Na      | 2    | 1       | 22.2659                             | 2       | <.0001* | 0.1303          |
|                        |         | 3    | 2       |                                     |         |         | 0.0015*         |
|                        |         | 3    | 1       |                                     |         |         | <.0001*         |
|                        | Mg      | 2    | 1       | 1.9005                              | 2       | 0.3867  | 0.9386          |
|                        |         | 3    | 2       |                                     |         |         | 0.4755          |
|                        |         | 3    | 1       |                                     |         |         | 0.0502          |
|                        | Si      | 3    | 1       | 2.7022                              | 1       | 0.1002  | 0.1588          |
|                        | P       | 3    | 1       | 17.9541                             | 2       | 0.0001* | <.0001*         |
|                        |         | 2    | 1       |                                     |         |         | 0.0001*         |
|                        |         | 3    | 2       |                                     |         |         | 0.5787          |
|                        | S       | 3    | 2       | 2.1104                              | 2       | 0.3481  | 0.5611          |
|                        |         | 3    | 1       |                                     |         |         | 0.4912          |
|                        |         | 2    | 1       |                                     |         |         | 0.1626          |
|                        | Cl      | 2    | 1       | 11.2873                             | 2       | 0.0035* | 0.0036*         |
|                        |         | 3    | 1       |                                     |         |         | 0.3311          |
|                        |         | 3    | 2       |                                     |         |         | 0.0071*         |
|                        | Ca      | 2    | 1       | 34.8816                             | 2       | <.0001* | <.0001*         |
|                        | Ca      | 3    | 1       |                                     |         |         | 0.1916          |
| Ca                     | 3       | 2    | 0.0020* |                                     |         |         |                 |
| Fe                     | 2       | 1    | 2.0833  | 1                                   | 0.1489  | 0.1939  |                 |
| All elements           | 2       | 1    | 88.7166 | 2                                   | <.0001* | <.0001* |                 |
|                        | 3       | 1    |         |                                     |         | <.0001* |                 |
|                        | 3       | 2    |         |                                     |         | 0.1396  |                 |
| <i>Cornu aspersum</i>  | Mg      | 2    | 1       | 9.7707                              | 1       | 0.0018* | 0.0020*         |
|                        | Si      | 3    | 2       | 6.9712                              | 2       | 0.0306* | 0.0502          |
|                        |         | 2    | 1       |                                     |         |         | 0.2453          |
|                        |         | 3    | 1       |                                     |         |         | 0.0896          |
|                        | P       | 2    | 1       | 17.8504                             | 1       | <.0001* | <.0001*         |
|                        | S       | 2    | 1       | 22.7690                             | 2       | <.0001* | <.0001*         |
|                        |         | 3    | 1       |                                     |         |         | <.0001*         |
|                        |         | 3    | 2       |                                     |         |         | 0.5782          |
|                        | Ca      | 3    | 1       | 50.6911                             | 2       | <.0001* | <.0001*         |
|                        |         | 3    | 2       |                                     |         |         | <.0001*         |
| 2                      |         | 1    | 0.0051* |                                     |         |         |                 |
| All elements           | 3       | 1    | 63.4166 | 2                                   | <.0001* | <.0001* |                 |
|                        | 2       | 1    |         |                                     |         | <.0001* |                 |
|                        | 3       | 2    |         |                                     |         | <.0001* |                 |
| <i>Lavigeria nassa</i> | Na      | 3    | 2       | 0.2515                              | 1       | 0.6160  | 0.6314          |
|                        | Mg      | 3    | 1       | 38.4571                             | 2       | <.0001* | <.0001*         |
|                        |         | 2    | 1       |                                     |         |         | <.0001*         |
|                        |         | 3    | 2       |                                     |         |         | 0.5833          |
|                        | Si      | 3    | 2       | 3.4069                              | 2       | 0.1821  | 0.3476          |
|                        |         | 2    | 1       |                                     |         |         | 0.4212          |
|                        |         | 3    | 1       |                                     |         |         | 0.1058          |
|                        | P       | 3    | 1       | 33.0450                             | 2       | <.0001* | <.0001*         |
|                        |         | 3    | 2       |                                     |         |         | 0.0002*         |
|                        |         | 2    | 1       |                                     |         |         | <.0001*         |
|                        | S       | 3    | 1       | 24.7520                             | 2       | <.0001* | <.0001*         |
|                        |         | 2    | 1       |                                     |         |         | <.0001*         |
|                        |         | 3    | 2       |                                     |         |         | 0.4331          |
|                        | Cl      | 3    | 1       | 36.9750                             | 2       | <.0001* | <.0001*         |
|                        |         | 2    | 1       |                                     |         |         | <.0001*         |
|                        |         | 3    | 2       |                                     |         |         | 0.2060          |
|                        | Ca      | 3    | 1       | 33.5654                             | 2       | <.0001* | <.0001*         |
| 2                      |         | 1    | <.0001* |                                     |         |         |                 |
| 3                      |         | 2    | 0.2987  |                                     |         |         |                 |
| All elements           | 3       | 1    | 89.5694 | 2                                   | <.0001* | <.0001* |                 |
|                        | 2       | 1    |         |                                     |         | <.0001* |                 |

|                           |    |   |         |          |         |         |         |
|---------------------------|----|---|---------|----------|---------|---------|---------|
| <i>Littorina littorea</i> |    | 3 | 2       |          |         |         | 0.0113* |
|                           | F  | 4 | 3       | 2.2756   | 1       | 0.1314  | 0.1385  |
|                           | Na | 3 | 1       | 49.1450  | 3       | <.0001* | 0.0001* |
|                           |    | 3 | 2       |          |         |         | 0.0087* |
|                           |    | 2 | 1       |          |         |         | 0.0056* |
|                           |    | 4 | 1       |          |         |         | 0.9125  |
|                           |    | 4 | 2       |          |         |         | <.0001* |
|                           |    | 4 | 3       |          |         |         | <.0001* |
|                           | Mg | 4 | 2       | 6.6881   | 3       | 0.0825  | 0.2077  |
|                           |    | 4 | 3       |          |         |         | 0.1047  |
|                           |    | 3 | 2       |          |         |         | 0.2471  |
|                           |    | 4 | 1       |          |         |         | 0.6722  |
|                           |    | 3 | 1       |          |         |         | 0.0303* |
|                           |    | 2 | 1       |          |         |         | 0.0089* |
|                           | Si | 3 | 1       | 21.2243  | 3       | <.0001* | 0.0040* |
|                           |    | 3 | 2       |          |         |         | 0.0014* |
|                           |    | 4 | 1       |          |         |         | 0.0075* |
|                           |    | 4 | 2       |          |         |         | 0.0026* |
|                           |    | 2 | 1       |          |         |         | 0.6933  |
|                           |    | 4 | 3       |          |         |         | 0.0494* |
|                           | P  | 4 | 1       | 44.2263  | 3       | <.0001* | <.0001* |
|                           |    | 4 | 2       |          |         |         | <.0001* |
|                           |    | 3 | 2       |          |         |         | <.0001* |
|                           |    | 3 | 1       |          |         |         | <.0001* |
|                           |    | 2 | 1       |          |         |         | 0.0031* |
|                           |    | 4 | 3       |          |         |         | 0.6298  |
|                           | S  | 3 | 1       | 102.9703 | 3       | <.0001* | <.0001* |
|                           |    | 2 | 1       |          |         |         | <.0001* |
|                           |    | 3 | 2       |          |         |         | 0.4578  |
|                           |    | 4 | 1       |          |         |         | <.0001* |
|                           |    | 4 | 2       |          |         |         | <.0001* |
|                           |    | 4 | 3       |          |         |         | <.0001* |
|                           | Cl | 3 | 2       | 5.3959   | 3       | 0.1450  | 0.7048  |
|                           |    | 3 | 1       |          |         |         | 0.7233  |
|                           |    | 2 | 1       |          |         |         | 0.7232  |
|                           |    | 4 | 1       |          |         |         | 0.0261* |
|                           |    | 4 | 2       |          |         |         | 0.0530  |
|                           |    | 4 | 3       |          |         |         | 0.0253* |
|                           | K  | 3 | 2       | 1.2410   | 3       | 0.7432  | 0.3480  |
|                           |    | 3 | 1       |          |         |         | 1.0000  |
|                           |    | 4 | 1       |          |         |         | 0.6781  |
|                           |    | 4 | 2       |          |         |         | 0.5949  |
|                           |    | 4 | 3       |          |         |         | 0.5209  |
|                           |    | 2 | 1       |          |         |         | 0.5127  |
|                           | Ca | 3 | 2       | 40.7542  | 3       | <.0001* | <.0001* |
|                           |    | 4 | 2       |          |         |         | <.0001* |
|                           |    | 4 | 1       |          |         |         | 0.0162* |
| 3                         |    | 1 | 0.0843  |          |         |         |         |
| 4                         |    | 3 | 0.2945  |          |         |         |         |
| 2                         |    | 1 | <.0001* |          |         |         |         |
| Fe                        | 4  | 2 | 19.0414 | 3        | <.0001* | 0.0002* |         |
|                           | 4  | 3 |         |          |         | 0.0044* |         |
|                           | 3  | 2 |         |          |         | 0.0038* |         |
|                           | 4  | 1 |         |          |         | 0.3178  |         |
|                           | 3  | 1 |         |          |         | 0.6122  |         |
|                           | 2  | 1 |         |          |         | 0.1143  |         |
| All elements              | 3  | 2 | 53.6241 | 3        | <.0001* | <.0001* |         |
|                           | 3  | 1 |         |          |         | <.0001* |         |
|                           | 4  | 2 |         |          |         | 0.0025* |         |
|                           | 4  | 1 |         |          |         | 0.0036* |         |
|                           | 2  | 1 |         |          |         | 0.4330  |         |
|                           | 4  | 3 |         |          |         | 0.3902  |         |
| <i>Reymondia horei</i>    | Na | 2 | 0.4498  | 2        | 0.7986  | 0.6521  |         |
|                           |    | 3 |         |          |         | 0.9629  |         |



|                        |    |   |         |         |         |         |         |
|------------------------|----|---|---------|---------|---------|---------|---------|
|                        | Mg | 3 | 2       | 5.6003  | 2       | 0.0608  | 0.5096  |
|                        |    | 3 | 2       |         |         |         | 0.6250  |
|                        |    | 3 | 1       |         |         |         | 0.0540  |
|                        |    | 2 | 1       |         |         |         | 0.0199* |
|                        | Si | 2 | 1       | 1.4081  | 2       | 0.4946  | 0.5362  |
|                        |    | 3 | 1       |         |         |         | 1.0000  |
|                        |    | 3 | 2       |         |         |         | 0.2417  |
|                        | P  | 2 | 1       | 0.4147  | 2       | 0.8127  | 0.1394  |
|                        |    | 3 | 1       |         |         |         | 0.6587  |
|                        |    | 3 | 2       |         |         |         | 0.9506  |
|                        | S  | 2 | 1       | 20.0553 | 2       | <.0001* | 0.0250* |
|                        |    | 3 | 2       |         |         |         | 0.0358* |
|                        |    | 3 | 1       |         |         |         | <.0001* |
|                        | Cl | 3 | 1       | 14.6722 | 2       | 0.0007* | 0.0002* |
|                        |    | 2 | 1       |         |         |         | 0.0020* |
|                        |    | 3 | 2       |         |         |         | 0.2203  |
|                        | K  | 3 | 2       | 0.3168  | 1       | 0.5736  | 0.6169  |
|                        | Ca | 2 | 1       | 52.5669 | 2       | <.0001* | <.0001* |
|                        |    | 3 | 1       |         |         |         | <.0001* |
|                        |    | 3 | 2       |         |         |         | 0.0018* |
| Fe                     | 3  | 2 | 3.1537  | 1       | 0.0758  | 0.0974  |         |
| All elements           | 3  | 1 | 25.3443 | 2       | <.0001* | <.0001* |         |
|                        | 2  | 1 |         |         |         | 0.0010* |         |
|                        | 3  | 2 |         |         |         | 0.0056* |         |
| Cu                     | 3  | 1 | 5.2295  | 2       | 0.0732  | 0.0336* |         |
|                        | 2  | 1 |         |         |         | 0.0330* |         |
|                        | 3  | 2 |         |         |         | 0.9643  |         |
| <b>Vittina turrata</b> | F  | 2 | 1       | 2.2500  | 2       | 0.3247  | 0.5403  |
|                        |    | 3 | 1       |         |         |         | 1.0000  |
|                        |    | 3 | 2       |         |         |         | 1.0000  |
|                        | Na | 3 | 1       | 47.6544 | 3       | <.0001* | <.0001* |
|                        |    | 2 | 1       |         |         |         | 0.0005* |
|                        |    | 3 | 2       |         |         |         | 0.3015  |
|                        |    | 4 | 1       |         |         |         | 0.0171* |
|                        |    | 4 | 2       |         |         |         | <.0001* |
|                        |    | 4 | 3       |         |         |         | <.0001* |
|                        | Mg | 2 | 1       | 38.0484 | 3       | <.0001* | <.0001* |
|                        |    | 3 | 1       |         |         |         | 0.0002* |
|                        |    | 4 | 1       |         |         |         | 0.0432* |
|                        |    | 3 | 2       |         |         |         | 0.9753  |
|                        |    | 4 | 3       |         |         |         | <.0001* |
|                        |    | 4 | 2       |         |         |         | <.0001* |
|                        | Si | 2 | 1       | 8.3696  | 3       | 0.0390* | 0.0080* |
|                        |    | 4 | 1       |         |         |         | 0.4093  |
|                        |    | 3 | 1       |         |         |         | 0.7342  |
|                        |    | 4 | 3       |         |         |         | 0.9933  |
|                        |    | 3 | 2       |         |         |         | 0.5839  |
|                        |    | 4 | 2       |         |         |         | 0.0086* |
|                        | P  | 4 | 1       | 23.8280 | 3       | <.0001* | 0.0001* |
|                        |    | 2 | 1       |         |         |         | 0.0006* |
|                        |    | 3 | 1       |         |         |         | 0.0047* |
|                        |    | 4 | 3       |         |         |         | 0.8490  |
|                        |    | 3 | 2       |         |         |         | 0.6632  |
|                        |    | 4 | 2       |         |         |         | 0.0003* |
|                        | S  | 2 | 1       | 44.6131 | 3       | <.0001* | <.0001* |
| 4                      |    | 1 | 0.0114* |         |         |         |         |
| 3                      |    | 1 | 0.0001* |         |         |         |         |
| 3                      |    | 2 | 0.6532  |         |         |         |         |
| 4                      |    | 3 | 0.0006* |         |         |         |         |
| Cl                     | 4  | 2 | 54.5165 | 3       | <.0001* | <.0001* |         |
|                        | 2  | 1 |         |         |         | 0.0001* |         |
|                        | 3  | 1 |         |         |         | 0.0019* |         |
|                        | 3  | 2 |         |         |         | 0.4883  |         |
|                        |    | 4 | 1       |         |         |         | 0.0552  |

|  |              |   |         |         |   |         |         |
|--|--------------|---|---------|---------|---|---------|---------|
|  |              | 4 | 3       |         |   |         | <.0001* |
|  |              | 4 | 2       |         |   |         | <.0001* |
|  | K            | 3 | 2       | 2.6190  | 1 | 0.1056  | 0.1453  |
|  | Ca           | 4 | 1       | 27.2877 | 3 | <.0001* | <.0001* |
|  |              | 2 | 1       |         |   |         | <.0001* |
|  |              | 3 | 1       |         |   |         | 0.0002* |
|  |              | 4 | 3       |         |   |         | 0.0898  |
|  |              | 4 | 2       |         |   |         | 0.4876  |
|  | Fe           | 3 | 2       |         |   |         | 0.5293  |
|  |              | 2 | 1       | 5.0775  | 2 | 0.0790  | 0.0514  |
|  |              | 4 | 1       |         |   |         | 0.0654  |
|  | 4            | 2 | 0.3106  |         |   |         |         |
|  | All elements | 2 | 1       | 62.5687 | 3 | <.0001* | <.0001* |
|  |              | 4 | 1       |         |   |         | <.0001* |
|  |              | 3 | 1       |         |   |         | <.0001* |
|  |              | 3 | 2       |         |   |         | 0.9591  |
|  |              | 4 | 3       |         |   |         | <.0001* |
|  | 4            | 2 | <.0001* |         |   |         |         |

**Supplementary Table 4.** Results from Kruskal-Wallis test and pairwise comparison by Wilcoxon method (orange and red p-values = significant or highly significant) for the proportions of F, Na, Mg, Si, P, S, Cl, K, Ca, Fe, Cu, and all elements pooled together between the tooth types of each ontogenetic zone for each species.

| Species                | Element      | Tooth and Zone | Tooth and Zone | 1-Way Test: ChiSquare approximation |    |         | Wilcoxon method |
|------------------------|--------------|----------------|----------------|-------------------------------------|----|---------|-----------------|
|                        |              |                |                | ChiSquare                           | df | p-value | p-value         |
| <i>Anentome helena</i> | Na           | Lateral 2      | Central 3      | 33.3314                             | 4  | <.0001* | <.0001*         |
|                        |              | Lateral 3      | Central 3      |                                     |    |         | 0.0006*         |
|                        |              | Lateral 1      | Central 3      |                                     |    |         | <.0001*         |
|                        |              | Lateral 2      | Central 2      |                                     |    |         | 0.0286*         |
|                        |              | Lateral 1      | Central 2      |                                     |    |         | 0.0406*         |
|                        |              | Lateral 3      | Central 2      |                                     |    |         | 0.7918          |
|                        |              | Lateral 2      | Lateral 1      |                                     |    |         | 0.2887          |
|                        |              | Central 3      | Central 2      |                                     |    |         | 0.0371*         |
|                        |              | Lateral 3      | Lateral 2      |                                     |    |         | 0.0363*         |
|                        |              | Lateral 3      | Lateral 1      |                                     |    |         | <.0001*         |
|                        | Mg           | Lateral 1      | Central 2      | 9.5843                              | 5  | 0.0879  | 0.0015*         |
|                        |              | Lateral 2      | Central 1      |                                     |    |         | 0.0639          |
|                        |              | Lateral 1      | Central 3      |                                     |    |         | 0.0297*         |
|                        |              | Lateral 3      | Central 3      |                                     |    |         | 0.0380*         |
|                        |              | Lateral 2      | Central 2      |                                     |    |         | 0.1544          |
|                        |              | Lateral 1      | Central 1      |                                     |    |         | 0.1420          |
|                        |              | Lateral 3      | Central 1      |                                     |    |         | 0.2021          |
|                        |              | Lateral 2      | Central 2      |                                     |    |         | 0.3269          |
|                        |              | Lateral 3      | Lateral 2      |                                     |    |         | 0.5592          |
|                        |              | Lateral 3      | Central 2      |                                     |    |         | 0.9148          |
|                        |              | Central 3      | Lateral 1      |                                     |    |         | 0.9450          |
|                        |              | Lateral 2      | Central 1      |                                     |    |         | 0.8020          |
|                        |              | Central 2      | Lateral 1      |                                     |    |         | 0.4176          |
|                        |              | Lateral 3      | Central 1      |                                     |    |         | 0.0735          |
|                        |              | Central 3      | Central 2      |                                     |    |         | 0.1696          |
|                        | Si           | Lateral 3      | Lateral 1      | 2.7022                              | 1  | 0.1002  | 0.1588          |
|                        | P            | Lateral 3      | Central 1      | 19.7791                             | 4  | 0.0006* | <.0001*         |
|                        |              | Lateral 2      | Central 1      |                                     |    |         | <.0001*         |
|                        |              | Central 2      | Central 1      |                                     |    |         | 0.0068*         |
|                        |              | Central 3      | Central 1      |                                     |    |         | 0.0272*         |
|                        |              | Lateral 3      | Central 3      |                                     |    |         | 0.2722          |
|                        |              | Lateral 2      | Central 3      |                                     |    |         | 0.2859          |
|                        |              | Lateral 3      | Central 2      |                                     |    |         | 0.8942          |
|                        |              | Lateral 3      | Lateral 2      |                                     |    |         | 0.9558          |
|                        |              | Lateral 2      | Central 2      |                                     |    |         | 0.9676          |
|                        |              | Central 3      | Central 2      |                                     |    |         | 0.3129          |
|                        | S            | Lateral 2      | Central 2      | 27.1975                             | 5  | <.0001* | 0.0040*         |
|                        |              | Lateral 2      | Lateral 1      |                                     |    |         | 0.0103*         |
|                        |              | Central 3      | Central 2      |                                     |    |         | 0.0064*         |
|                        |              | Lateral 1      | Central 2      |                                     |    |         | 0.4737          |
|                        |              | Lateral 3      | Central 2      |                                     |    |         | 0.7796          |
|                        |              | Central 3      | Central 1      |                                     |    |         | 0.4412          |
|                        |              | Lateral 3      | Lateral 1      |                                     |    |         | 0.1668          |
|                        |              | Lateral 3      | Central 3      |                                     |    |         | 0.0454*         |
|                        |              | Lateral 1      | Central 3      |                                     |    |         | 0.0142*         |
|                        |              | Lateral 3      | Central 1      |                                     |    |         | 0.0269*         |
|                        |              | Lateral 2      | Central 3      |                                     |    |         | 0.1294          |
|                        |              | Lateral 3      | Lateral 2      |                                     |    |         | 0.0544          |
|                        |              | Lateral 1      | Central 1      |                                     |    |         | 0.0015*         |
|                        |              | Lateral 2      | Central 1      |                                     |    |         | 0.0078*         |
|                        |              | Central 2      | Central 1      |                                     |    |         | 0.0003*         |
|                        | Cl           | Lateral 2      | Lateral 1      | 25.7539                             | 4  | <.0001* | 0.0001*         |
|                        |              | Lateral 2      | Central 2      |                                     |    |         | 0.0001*         |
|                        |              | Lateral 2      | Central 3      |                                     |    |         | 0.0015*         |
|                        |              | Central 3      | Central 2      |                                     |    |         | 0.1601          |
|                        |              | Lateral 3      | Lateral 1      |                                     |    |         | 0.9634          |
|                        |              | Lateral 3      | Central 2      |                                     |    |         | 0.7733          |
|                        |              | Lateral 1      | Central 2      |                                     |    |         | 0.5356          |
|                        |              | Lateral 3      | Central 3      |                                     |    |         | 0.1520          |
|                        |              | Lateral 1      | Central 3      |                                     |    |         | 0.0586          |
|                        |              | Lateral 3      | Lateral 2      |                                     |    |         | <.0001*         |
|                        | Ca           | Lateral 2      | Central 3      | 72.3733                             | 5  | <.0001* | <.0001*         |
|                        |              | Lateral 2      | Lateral 1      |                                     |    |         | <.0001*         |
|                        |              | Lateral 3      | Central 3      |                                     |    |         | <.0001*         |
|                        |              | Lateral 3      | Lateral 1      |                                     |    |         | <.0001*         |
|                        |              | Lateral 2      | Central 1      |                                     |    |         | <.0001*         |
|                        |              | Lateral 1      | Central 3      |                                     |    |         | 0.0002*         |
|                        |              | Central 2      | Central 1      |                                     |    |         | <.0001*         |
|                        |              | Lateral 3      | Central 1      |                                     |    |         | <.0001*         |
|                        |              | Lateral 1      | Central 1      |                                     |    |         | 0.1968          |
|                        |              | Lateral 3      | Lateral 2      |                                     |    |         | 0.1829          |
|                        |              | Central 3      | Central 1      |                                     |    |         | 0.1397          |
|                        |              | Lateral 3      | Central 2      |                                     |    |         | 0.0879          |
|                        |              | Lateral 2      | Central 2      |                                     |    |         | 0.0099*         |
|                        |              | Central 3      | Central 2      |                                     |    |         | <.0001*         |
|                        |              | Lateral 1      | Central 2      |                                     |    |         | <.0001*         |
|                        | Fe           | Lateral 2      | Lateral 1      | 2.0833                              | 1  | 0.1489  | 0.1939          |
|                        | All elements | Lateral 2      | Lateral 1      | 92.1825                             | 5  | <.0001* | <.0001*         |
|                        |              | Lateral 3      | Lateral 1      |                                     |    |         | <.0001*         |
|                        |              | Lateral 2      | Central 1      |                                     |    |         | <.0001*         |
|                        |              | Lateral 3      | Central 1      |                                     |    |         | <.0001*         |
|                        |              | Central 2      | Central 1      |                                     |    |         | <.0001*         |
|                        |              | Central 3      | Central 1      |                                     |    |         | 0.0003*         |
|                        |              | Lateral 2      | Central 3      |                                     |    |         | 0.0259*         |
|                        |              | Lateral 3      | Central 3      |                                     |    |         | 0.0144*         |
|                        | Lateral 3    | Lateral 2      | 0.6507         |                                     |    |         |                 |

|                       |                  |                        |               |                  |         |         |               |           |        |         |         |        |
|-----------------------|------------------|------------------------|---------------|------------------|---------|---------|---------------|-----------|--------|---------|---------|--------|
|                       |                  | Lateral 1              | Central 1     |                  |         |         | 0.8259        |           |        |         |         |        |
|                       |                  | Lateral 3              | Central 2     |                  |         |         | 0.3936        |           |        |         |         |        |
|                       |                  | Lateral 2              | Central 2     |                  |         |         | 0.2303        |           |        |         |         |        |
|                       |                  | Central 3              | Central 2     |                  |         |         | 0.0105*       |           |        |         |         |        |
|                       |                  | Lateral 1              | Central 3     |                  |         |         | <.0001*       |           |        |         |         |        |
|                       |                  | Lateral 1              | Central 2     |                  |         |         | <.0001*       |           |        |         |         |        |
| <i>Cornu aspersum</i> | Mg               | Outer teeth 2          | Outer teeth 1 | 9.8827           | 3       | 0.0196* | 0.0329*       |           |        |         |         |        |
|                       |                  | Outer teeth 2          | Inner teeth 1 |                  |         |         | 0.0230*       |           |        |         |         |        |
|                       |                  | Inner teeth 2          | Inner teeth 1 |                  |         |         | 0.0402*       |           |        |         |         |        |
|                       |                  | Outer teeth 1          | Inner teeth 1 |                  |         |         | 0.9156        |           |        |         |         |        |
|                       |                  | Outer teeth 2          | Inner teeth 2 |                  |         |         | 0.7628        |           |        |         |         |        |
|                       |                  | Outer teeth 1          | Inner teeth 2 |                  |         |         | 0.0645        |           |        |         |         |        |
|                       | Si               | Inner teeth 3          | Inner teeth 2 | 7.5962           | 4       | 0.1075  | 0.1052        |           |        |         |         |        |
|                       |                  | Outer teeth 3          | Inner teeth 2 |                  |         |         | 0.1052        |           |        |         |         |        |
|                       |                  | Outer teeth 1          | Inner teeth 3 |                  |         |         | 0.2888        |           |        |         |         |        |
|                       |                  | Outer teeth 3          | Inner teeth 3 |                  |         |         | 0.4705        |           |        |         |         |        |
|                       |                  | Outer teeth 1          | Inner teeth 2 |                  |         |         | 0.5403        |           |        |         |         |        |
|                       |                  | Outer teeth 1          | Inner teeth 1 |                  |         |         | 1.0000        |           |        |         |         |        |
|                       |                  | Outer teeth 3          | Inner teeth 1 |                  |         |         | 0.7237        |           |        |         |         |        |
|                       |                  | Inner teeth 2          | Inner teeth 1 |                  |         |         | 0.5403        |           |        |         |         |        |
|                       |                  | Inner teeth 3          | Inner teeth 1 |                  |         |         | 0.2888        |           |        |         |         |        |
|                       |                  | Outer teeth 3          | Outer teeth 1 |                  |         |         | 0.2888        |           |        |         |         |        |
|                       | P                | Outer teeth 2          | Outer teeth 1 | 18.0703          | 3       | 0.0004* | 0.0007*       |           |        |         |         |        |
|                       |                  | Inner teeth 2          | Inner teeth 1 |                  |         |         | 0.0338*       |           |        |         |         |        |
|                       |                  | Outer teeth 2          | Inner teeth 1 |                  |         |         | 0.0338*       |           |        |         |         |        |
|                       |                  | Outer teeth 2          | Inner teeth 2 |                  |         |         | 0.6816        |           |        |         |         |        |
|                       |                  | Outer teeth 1          | Inner teeth 1 |                  |         |         | 0.2200        |           |        |         |         |        |
|                       |                  | Outer teeth 1          | Inner teeth 2 |                  |         |         | 0.0007*       |           |        |         |         |        |
|                       | S                | Outer teeth 2          | Outer teeth 1 | 24.5911          | 5       | 0.0002* | 0.0005*       |           |        |         |         |        |
|                       |                  | Outer teeth 3          | Outer teeth 1 |                  |         |         | 0.0003*       |           |        |         |         |        |
|                       |                  | Inner teeth 2          | Inner teeth 1 |                  |         |         | 0.0071*       |           |        |         |         |        |
|                       |                  | Outer teeth 2          | Inner teeth 1 |                  |         |         | 0.0208*       |           |        |         |         |        |
|                       |                  | Outer teeth 3          | Inner teeth 1 |                  |         |         | 0.0068*       |           |        |         |         |        |
|                       |                  | Inner teeth 3          | Inner teeth 1 |                  |         |         | 0.0164*       |           |        |         |         |        |
|                       |                  | Outer teeth 3          | Outer teeth 2 |                  |         |         | 0.2080        |           |        |         |         |        |
|                       |                  | Outer teeth 3          | Inner teeth 3 |                  |         |         | 0.3494        |           |        |         |         |        |
|                       |                  | Outer teeth 1          | Inner teeth 1 |                  |         |         | 0.4125        |           |        |         |         |        |
|                       |                  | Outer teeth 3          | Inner teeth 2 |                  |         |         | 0.8170        |           |        |         |         |        |
|                       |                  | Outer teeth 2          | Inner teeth 3 |                  |         |         | 0.6514        |           |        |         |         |        |
|                       |                  | Inner teeth 3          | Inner teeth 2 |                  |         |         | 0.5632        |           |        |         |         |        |
|                       |                  | Outer teeth 2          | Inner teeth 2 |                  |         |         | 0.1954        |           |        |         |         |        |
|                       |                  | Outer teeth 1          | Inner teeth 3 |                  |         |         | 0.0010*       |           |        |         |         |        |
|                       |                  | Outer teeth 1          | Inner teeth 2 |                  |         |         | 0.0003*       |           |        |         |         |        |
|                       |                  | Ca                     | Outer teeth 3 |                  |         |         | Inner teeth 1 | 50.7547   | 5      | <.0001* | <.0001* |        |
|                       | Outer teeth 3    |                        | Outer teeth 1 | <.0001*          |         |         |               |           |        |         |         |        |
|                       | Inner teeth 3    |                        | Inner teeth 1 | <.0001*          |         |         |               |           |        |         |         |        |
|                       | Inner teeth 3    |                        | Inner teeth 2 | 0.0002*          |         |         |               |           |        |         |         |        |
|                       | Outer teeth 3    |                        | Inner teeth 2 | 0.0003*          |         |         |               |           |        |         |         |        |
|                       | Outer teeth 3    |                        | Outer teeth 2 | 0.0006*          |         |         |               |           |        |         |         |        |
|                       | Outer teeth 2    |                        | Inner teeth 1 | 0.0425*          |         |         |               |           |        |         |         |        |
|                       | Outer teeth 2    |                        | Outer teeth 1 | 0.0479*          |         |         |               |           |        |         |         |        |
|                       | Inner teeth 2    |                        | Inner teeth 1 | 0.0539           |         |         |               |           |        |         |         |        |
|                       | Outer teeth 2    |                        | Inner teeth 2 | 0.8130           |         |         |               |           |        |         |         |        |
|                       | Outer teeth 1    |                        | Inner teeth 1 | 0.8359           |         |         |               |           |        |         |         |        |
|                       | Outer teeth 3    |                        | Inner teeth 3 | 0.6949           |         |         |               |           |        |         |         |        |
|                       | Outer teeth 1    |                        | Inner teeth 2 | 0.0571           |         |         |               |           |        |         |         |        |
|                       | Outer teeth 2    |                        | Inner teeth 3 | 0.0003*          |         |         |               |           |        |         |         |        |
|                       | Outer teeth 1    |                        | Inner teeth 3 | <.0001*          |         |         |               |           |        |         |         |        |
|                       | All elements     |                        | Outer teeth 3 | Inner teeth 1    | 63.6305 | 5       | <.0001*       |           |        |         | <.0001* |        |
|                       |                  |                        | Outer teeth 3 | Outer teeth 1    |         |         |               |           |        |         | <.0001* |        |
|                       |                  |                        | Outer teeth 2 | Inner teeth 1    |         |         |               |           |        |         | <.0001* |        |
|                       |                  | Inner teeth 3          | Inner teeth 1 | <.0001*          |         |         |               |           |        |         |         |        |
|                       |                  | Inner teeth 2          | Inner teeth 1 | <.0001*          |         |         |               |           |        |         |         |        |
|                       |                  | Outer teeth 2          | Outer teeth 1 | 0.0003*          |         |         |               |           |        |         |         |        |
|                       |                  | Inner teeth 3          | Inner teeth 2 | 0.0008*          |         |         |               |           |        |         |         |        |
|                       |                  | Outer teeth 3          | Inner teeth 2 | 0.0013*          |         |         |               |           |        |         |         |        |
|                       |                  | Outer teeth 3          | Outer teeth 2 | 0.0018*          |         |         |               |           |        |         |         |        |
|                       |                  | Outer teeth 1          | Inner teeth 1 | 0.4587           |         |         |               |           |        |         |         |        |
|                       |                  | Outer teeth 2          | Inner teeth 2 | 0.9215           |         |         |               |           |        |         |         |        |
|                       |                  | Outer teeth 3          | Inner teeth 3 | 0.9892           |         |         |               |           |        |         |         |        |
|                       |                  | Outer teeth 2          | Inner teeth 3 | 0.0013*          |         |         |               |           |        |         |         |        |
|                       |                  | Outer teeth 1          | Inner teeth 2 | 0.0005*          |         |         |               |           |        |         |         |        |
|                       |                  | Outer teeth 1          | Inner teeth 3 | <.0001*          |         |         |               |           |        |         |         |        |
|                       |                  | <i>Lavigeria nassa</i> | Na            | Lateral 3        |         |         |               | Lateral 2 | 8.0175 | 7       | 0.3311  | 0.7754 |
|                       |                  |                        |               | Lateral 2        |         |         |               | Central 2 |        |         |         | 1.0000 |
|                       |                  |                        |               | Lateral 2        |         |         |               | Central 3 |        |         |         | 1.0000 |
|                       | Lateral 2        |                        |               | Inner Marginal 2 | 1.0000  |         |               |           |        |         |         |        |
|                       | Lateral 2        |                        |               | Inner Marginal 3 | 1.0000  |         |               |           |        |         |         |        |
|                       | Outer Marginal 2 |                        |               | Lateral 2        | 1.0000  |         |               |           |        |         |         |        |
|                       | Outer Marginal 3 |                        |               | Outer Marginal 2 | 0.7237  |         |               |           |        |         |         |        |
|                       | Outer Marginal 2 |                        |               | Central 2        | 0.5403  |         |               |           |        |         |         |        |
|                       | Outer Marginal 2 |                        |               | Inner Marginal 2 | 0.5403  |         |               |           |        |         |         |        |
|                       | Lateral 3        |                        |               | Central 2        | 0.7464  |         |               |           |        |         |         |        |
|                       | Lateral 3        |                        |               | Inner Marginal 2 | 0.7464  |         |               |           |        |         |         |        |
|                       | Central 3        |                        |               | Central 2        | 0.4745  |         |               |           |        |         |         |        |
|                       | Inner Marginal 3 |                        |               | Inner Marginal 2 | 0.4745  |         |               |           |        |         |         |        |
|                       | Lateral 3        |                        |               | Central 3        | 0.6198  |         |               |           |        |         |         |        |
|                       | Lateral 3        |                        |               | Inner Marginal 3 | 0.6198  |         |               |           |        |         |         |        |
|                       | Outer Marginal 3 |                        |               | Lateral 2        | 0.4705  |         |               |           |        |         |         |        |
|                       | Inner Marginal 2 |                        |               | Central 2        | 0.2453  |         |               |           |        |         |         |        |
|                       | Outer Marginal 2 |                        |               | Lateral 3        | 0.6314  |         |               |           |        |         |         |        |
|                       | Outer Marginal 2 |                        |               | Central 3        | 0.2888  |         |               |           |        |         |         |        |
|                       | Outer Marginal 2 |                        |               | Inner Marginal 3 | 0.2888  |         |               |           |        |         |         |        |
|                       | Inner Marginal 2 |                        |               | Central 3        | 0.1052  |         |               |           |        |         |         |        |



|  |   |                  |                  |         |    |         |         |
|--|---|------------------|------------------|---------|----|---------|---------|
|  |   | Lateral 3        | Central 2        |         |    |         | 0.2694  |
|  |   | Lateral 2        | Central 1        |         |    |         | 0.0102* |
|  |   | Lateral 2        | Inner Marginal 1 |         |    |         | 0.0102* |
|  |   | Central 3        | Central 2        |         |    |         | 0.0331* |
|  |   | Lateral 3        | Inner Marginal 2 |         |    |         | 0.3964  |
|  |   | Lateral 2        | Lateral 1        |         |    |         | 0.1340  |
|  |   | Central 2        | Central 1        |         |    |         | 0.0269* |
|  |   | Inner Marginal 2 | Central 1        |         |    |         | 0.0275* |
|  |   | Inner Marginal 2 | Inner Marginal 1 |         |    |         | 0.0275* |
|  |   | Outer Marginal 2 | Central 1        |         |    |         | 0.0497* |
|  |   | Outer Marginal 2 | Inner Marginal 1 |         |    |         | 0.0497* |
|  |   | Lateral 2        | Inner Marginal 3 |         |    |         | 0.4171  |
|  |   | Outer Marginal 2 | Lateral 1        |         |    |         | 0.2888  |
|  |   | Outer Marginal 2 | Outer Marginal 1 |         |    |         | 0.2888  |
|  |   | Outer Marginal 1 | Central 1        |         |    |         | 0.3458  |
|  |   | Outer Marginal 2 | Inner Marginal 3 |         |    |         | 0.5926  |
|  |   | Outer Marginal 3 | Central 1        |         |    |         | 0.6171  |
|  |   | Outer Marginal 2 | Lateral 2        |         |    |         | 0.9093  |
|  |   | Inner Marginal 1 | Central 1        |         |    |         | 1.0000  |
|  |   | Inner Marginal 2 | Central 2        |         |    |         | 1.0000  |
|  |   | Inner Marginal 3 | Central 1        |         |    |         | 1.0000  |
|  |   | Inner Marginal 3 | Inner Marginal 1 |         |    |         | 1.0000  |
|  |   | Lateral 1        | Central 1        |         |    |         | 1.0000  |
|  |   | Lateral 1        | Inner Marginal 1 |         |    |         | 1.0000  |
|  |   | Lateral 1        | Inner Marginal 3 |         |    |         | 1.0000  |
|  |   | Outer Marginal 1 | Inner Marginal 1 |         |    |         | 1.0000  |
|  |   | Outer Marginal 1 | Inner Marginal 3 |         |    |         | 1.0000  |
|  |   | Outer Marginal 1 | Lateral 1        |         |    |         | 1.0000  |
|  |   | Outer Marginal 3 | Inner Marginal 1 |         |    |         | 1.0000  |
|  |   | Outer Marginal 3 | Inner Marginal 3 |         |    |         | 1.0000  |
|  |   | Outer Marginal 3 | Lateral 1        |         |    |         | 1.0000  |
|  |   | Outer Marginal 3 | Outer Marginal 1 |         |    |         | 1.0000  |
|  |   | Inner Marginal 3 | Central 2        |         |    |         | 0.5151  |
|  |   | Inner Marginal 3 | Inner Marginal 2 |         |    |         | 0.3642  |
|  |   | Outer Marginal 3 | Outer Marginal 2 |         |    |         | 0.2888  |
|  |   | Outer Marginal 2 | Central 2        |         |    |         | 0.2835  |
|  |   | Outer Marginal 2 | Inner Marginal 2 |         |    |         | 0.2850  |
|  |   | Lateral 1        | Central 2        |         |    |         | 0.2072  |
|  |   | Lateral 1        | Inner Marginal 2 |         |    |         | 0.2113  |
|  |   | Outer Marginal 1 | Central 2        |         |    |         | 0.2072  |
|  |   | Outer Marginal 1 | Inner Marginal 2 |         |    |         | 0.2113  |
|  |   | Outer Marginal 3 | Central 2        |         |    |         | 0.2072  |
|  |   | Outer Marginal 3 | Inner Marginal 2 |         |    |         | 0.2113  |
|  |   | Lateral 2        | Central 2        |         |    |         | 0.1576  |
|  |   | Inner Marginal 1 | Central 2        |         |    |         | 0.0269* |
|  |   | Lateral 2        | Inner Marginal 2 |         |    |         | 0.0477* |
|  |   | Outer Marginal 1 | Lateral 2        |         |    |         | 0.1340  |
|  |   | Outer Marginal 3 | Lateral 2        |         |    |         | 0.1340  |
|  |   | Inner Marginal 3 | Central 3        |         |    |         | 0.1002  |
|  |   | Inner Marginal 2 | Central 3        |         |    |         | 0.0284* |
|  |   | Lateral 1        | Central 3        |         |    |         | 0.1167  |
|  |   | Outer Marginal 1 | Central 3        |         |    |         | 0.1167  |
|  |   | Outer Marginal 3 | Central 3        |         |    |         | 0.1167  |
|  |   | Outer Marginal 2 | Central 3        |         |    |         | 0.0047* |
|  |   | Inner Marginal 1 | Central 3        |         |    |         | 0.0071* |
|  |   | Lateral 3        | Central 3        |         |    |         | 0.0559  |
|  |   | Lateral 2        | Central 3        |         |    |         | <.0001* |
|  |   | Outer Marginal 2 | Lateral 3        |         |    |         | 0.0692  |
|  |   | Outer Marginal 1 | Lateral 3        |         |    |         | 0.0937  |
|  |   | Outer Marginal 3 | Lateral 3        |         |    |         | 0.0937  |
|  |   | Lateral 3        | Central 1        |         |    |         | 0.0023* |
|  |   | Lateral 3        | Inner Marginal 1 |         |    |         | 0.0026* |
|  |   | Lateral 3        | Lateral 1        |         |    |         | 0.0974  |
|  |   | Central 3        | Central 1        |         |    |         | 0.0018* |
|  |   | Lateral 2        | Central 1        |         |    |         | 0.0053* |
|  |   | Lateral 2        | Inner Marginal 1 |         |    |         | 0.0056* |
|  |   | Outer Marginal 3 | Inner Marginal 1 |         |    |         | 0.0053* |
|  |   | Lateral 3        | Lateral 2        |         |    |         | 0.2121  |
|  |   | Outer Marginal 2 | Inner Marginal 1 |         |    |         | 0.0058* |
|  |   | Outer Marginal 3 | Central 1        |         |    |         | 0.0087* |
|  |   | Outer Marginal 2 | Central 1        |         |    |         | 0.0053* |
|  |   | Central 2        | Central 1        |         |    |         | 0.0073* |
|  |   | Lateral 3        | Central 2        |         |    |         | 0.2976  |
|  |   | Outer Marginal 2 | Outer Marginal 1 |         |    |         | 0.0084* |
|  |   | Lateral 3        | Central 3        |         |    |         | 0.2926  |
|  |   | Outer Marginal 3 | Outer Marginal 1 |         |    |         | 0.0272* |
|  |   | Outer Marginal 2 | Lateral 3        |         |    |         | 0.3855  |
|  | S | Inner Marginal 3 | Inner Marginal 1 | 29.7225 | 11 | 0.0018* | 0.0413* |
|  |   | Outer Marginal 3 | Lateral 1        |         |    |         | 0.0645  |
|  |   | Outer Marginal 2 | Lateral 2        |         |    |         | 0.1499  |
|  |   | Inner Marginal 3 | Central 1        |         |    |         | 0.0755  |
|  |   | Inner Marginal 2 | Inner Marginal 1 |         |    |         | 0.0840  |
|  |   | Outer Marginal 3 | Central 3        |         |    |         | 0.1555  |
|  |   | Outer Marginal 2 | Lateral 1        |         |    |         | 0.0991  |
|  |   | Inner Marginal 2 | Central 1        |         |    |         | 0.1274  |
|  |   | Lateral 2        | Lateral 1        |         |    |         | 0.2455  |
|  |   | Outer Marginal 3 | Lateral 2        |         |    |         | 0.2454  |
|  |   | Outer Marginal 3 | Lateral 3        |         |    |         | 0.5303  |
|  |   | Outer Marginal 3 | Central 2        |         |    |         | 0.2060  |
|  |   | Outer Marginal 2 | Central 3        |         |    |         | 0.3020  |
|  |   | Outer Marginal 2 | Central 2        |         |    |         | 0.3047  |
|  |   | Inner Marginal 3 | Central 3        |         |    |         | 0.4088  |
|  |   | Inner Marginal 3 | Central 2        |         |    |         | 0.4052  |
|  |   | Outer Marginal 2 | Inner Marginal 2 |         |    |         | 0.4277  |

|  |  |                  |                  |         |    |         |         |
|--|--|------------------|------------------|---------|----|---------|---------|
|  |  | Outer Marginal 1 | Inner Marginal 1 |         |    |         | 0.4647  |
|  |  | Lateral 3        | Inner Marginal 2 |         |    |         | 0.8030  |
|  |  | Outer Marginal 2 | Inner Marginal 3 |         |    |         | 0.6920  |
|  |  | Lateral 2        | Central 2        |         |    |         | 0.7653  |
|  |  | Outer Marginal 3 | Inner Marginal 2 |         |    |         | 0.7949  |
|  |  | Inner Marginal 3 | Inner Marginal 2 |         |    |         | 0.8170  |
|  |  | Inner Marginal 2 | Central 2        |         |    |         | 0.8290  |
|  |  | Lateral 1        | Central 1        |         |    |         | 0.8990  |
|  |  | Outer Marginal 1 | Lateral 1        |         |    |         | 0.9072  |
|  |  | Central 3        | Central 2        |         |    |         | 0.9280  |
|  |  | Lateral 1        | Inner Marginal 1 |         |    |         | 0.9145  |
|  |  | Inner Marginal 2 | Central 3        |         |    |         | 0.9493  |
|  |  | Lateral 2        | Central 3        |         |    |         | 0.9775  |
|  |  | Outer Marginal 1 | Central 1        |         |    |         | 1.0000  |
|  |  | Inner Marginal 1 | Central 1        |         |    |         | 0.7466  |
|  |  | Lateral 2        | Inner Marginal 2 |         |    |         | 0.7216  |
|  |  | Outer Marginal 3 | Outer Marginal 2 |         |    |         | 0.5974  |
|  |  | Outer Marginal 3 | Inner Marginal 3 |         |    |         | 0.6031  |
|  |  | Lateral 1        | Central 2        |         |    |         | 0.3393  |
|  |  | Lateral 3        | Inner Marginal 3 |         |    |         | 0.6407  |
|  |  | Lateral 1        | Inner Marginal 2 |         |    |         | 0.2721  |
|  |  | Lateral 1        | Central 3        |         |    |         | 0.2992  |
|  |  | Outer Marginal 1 | Inner Marginal 2 |         |    |         | 0.2011  |
|  |  | Lateral 2        | Inner Marginal 3 |         |    |         | 0.3117  |
|  |  | Lateral 1        | Inner Marginal 3 |         |    |         | 0.1190  |
|  |  | Outer Marginal 1 | Inner Marginal 3 |         |    |         | 0.0814  |
|  |  | Outer Marginal 1 | Central 2        |         |    |         | 0.0307* |
|  |  | Inner Marginal 1 | Central 2        |         |    |         | 0.0129* |
|  |  | Outer Marginal 1 | Central 3        |         |    |         | 0.0112* |
|  |  | Outer Marginal 1 | Lateral 2        |         |    |         | 0.0165* |
|  |  | Inner Marginal 1 | Central 3        |         |    |         | 0.0039* |
|  |  | Outer Marginal 1 | Lateral 3        |         |    |         | 0.0078* |
|  |  | Lateral 3        | Inner Marginal 1 |         |    |         | 0.0013* |
|  |  | Lateral 3        | Central 1        |         |    |         | 0.0043* |
|  |  | Lateral 3        | Lateral 1        |         |    |         | 0.0167* |
|  |  | Central 3        | Central 1        |         |    |         | 0.0006* |
|  |  | Lateral 3        | Inner Marginal 3 |         |    |         | 0.4608  |
|  |  | Central 2        | Central 1        |         |    |         | 0.0014* |
|  |  | Inner Marginal 2 | Central 1        |         |    |         | 0.0017* |
|  |  | Lateral 2        | Inner Marginal 1 |         |    |         | 0.0025* |
|  |  | Inner Marginal 2 | Inner Marginal 1 |         |    |         | 0.0028* |
|  |  | Lateral 2        | Lateral 1        |         |    |         | 0.0099* |
|  |  | Lateral 2        | Central 1        |         |    |         | 0.0079* |
|  |  | Outer Marginal 2 | Inner Marginal 1 |         |    |         | 0.0086* |
|  |  | Outer Marginal 2 | Outer Marginal 1 |         |    |         | 0.0104* |
|  |  | Outer Marginal 2 | Central 1        |         |    |         | 0.0118* |
|  |  | Outer Marginal 2 | Lateral 1        |         |    |         | 0.0567  |
|  |  | Lateral 2        | Inner Marginal 2 |         |    |         | 0.1700  |
|  |  | Lateral 1        | Inner Marginal 1 |         |    |         | 0.1690  |
|  |  | Lateral 2        | Inner Marginal 3 |         |    |         | 0.2375  |
|  |  | Outer Marginal 2 | Lateral 3        |         |    |         | 0.7505  |
|  |  | Lateral 2        | Central 3        |         |    |         | 0.6039  |
|  |  | Outer Marginal 1 | Inner Marginal 1 |         |    |         | 0.4798  |
|  |  | Lateral 1        | Central 1        |         |    |         | 0.7030  |
|  |  | Outer Marginal 2 | Inner Marginal 3 |         |    |         | 0.7688  |
|  |  | Lateral 2        | Central 2        |         |    |         | 0.8701  |
|  |  | Lateral 1        | Inner Marginal 3 |         |    |         | 0.9142  |
|  |  | Inner Marginal 3 | Central 1        |         |    |         | 1.0000  |
|  |  | Inner Marginal 3 | Inner Marginal 1 |         |    |         | 1.0000  |
|  |  | Outer Marginal 1 | Central 1        |         |    |         | 1.0000  |
|  |  | Outer Marginal 1 | Inner Marginal 3 |         |    |         | 1.0000  |
|  |  | Outer Marginal 2 | Inner Marginal 2 |         |    |         | 0.9576  |
|  |  | Inner Marginal 1 | Central 1        |         |    |         | 0.8287  |
|  |  | Outer Marginal 3 | Inner Marginal 3 | 46.4523 | 11 | <.0001* | 0.5403  |
|  |  | Central 3        | Central 2        |         |    |         | 0.7412  |
|  |  | Inner Marginal 3 | Inner Marginal 2 |         |    |         | 0.6335  |
|  |  | Outer Marginal 2 | Central 2        |         |    |         | 0.4937  |
|  |  | Lateral 3        | Inner Marginal 2 |         |    |         | 0.7959  |
|  |  | Outer Marginal 1 | Lateral 1        |         |    |         | 0.4033  |
|  |  | Outer Marginal 2 | Central 3        |         |    |         | 0.5243  |
|  |  | Inner Marginal 3 | Central 2        |         |    |         | 0.3893  |
|  |  | Outer Marginal 2 | Lateral 2        |         |    |         | 0.3143  |
|  |  | Inner Marginal 2 | Central 2        |         |    |         | 0.3057  |
|  |  | Outer Marginal 3 | Central 1        |         |    |         | 0.2030  |
|  |  | Outer Marginal 3 | Inner Marginal 1 |         |    |         | 0.1851  |
|  |  | Outer Marginal 3 | Outer Marginal 1 |         |    |         | 0.1851  |
|  |  | Outer Marginal 3 | Outer Marginal 2 |         |    |         | 0.1904  |
|  |  | Inner Marginal 2 | Central 3        |         |    |         | 0.2884  |
|  |  | Inner Marginal 3 | Central 3        |         |    |         | 0.3608  |
|  |  | Outer Marginal 3 | Inner Marginal 2 |         |    |         | 0.1586  |
|  |  | Outer Marginal 3 | Lateral 2        |         |    |         | 0.1637  |
|  |  | Outer Marginal 3 | Central 2        |         |    |         | 0.1547  |
|  |  | Outer Marginal 3 | Lateral 1        |         |    |         | 0.1528  |
|  |  | Lateral 1        | Inner Marginal 2 |         |    |         | 0.0363* |
|  |  | Outer Marginal 1 | Inner Marginal 2 |         |    |         | 0.0089* |
|  |  | Outer Marginal 1 | Lateral 2        |         |    |         | 0.0042* |
|  |  | Lateral 1        | Central 2        |         |    |         | 0.0058* |
|  |  | Outer Marginal 1 | Central 2        |         |    |         | 0.0015* |
|  |  | Inner Marginal 1 | Central 2        |         |    |         | 0.0013* |
|  |  | Lateral 3        | Central 3        |         |    |         | 0.1264  |
|  |  | Lateral 3        | Central 2        |         |    |         | 0.1584  |
|  |  | Outer Marginal 3 | Central 3        |         |    |         | 0.1167  |
|  |  | Lateral 1        | Central 3        |         |    |         | 0.0019* |
|  |  | Lateral 3        | Lateral 2        |         |    |         | 0.1390  |

|  |  |                  |                  |          |    |         |         |
|--|--|------------------|------------------|----------|----|---------|---------|
|  |  | Outer Marginal 1 | Central 3        |          |    |         | 0.0004* |
|  |  | Inner Marginal 1 | Central 3        |          |    |         | 0.0003* |
|  |  | Outer Marginal 1 | Lateral 3        |          |    |         | 0.0040* |
|  |  | Outer Marginal 3 | Lateral 3        |          |    |         | 0.0936  |
|  |  | Lateral 3        | Lateral 1        |          |    |         | <.0001* |
|  |  | Lateral 3        | Inner Marginal 1 |          |    |         | 0.0198* |
|  |  | Lateral 3        | Inner Marginal 3 |          |    |         | 0.0003* |
|  |  | Lateral 3        | Central 2        |          |    |         | 0.0026* |
|  |  | Lateral 2        | Lateral 1        |          |    |         | <.0001* |
|  |  | Central 3        | Central 2        |          |    |         | <.0001* |
|  |  | Lateral 2        | Inner Marginal 1 |          |    |         | 0.0242* |
|  |  | Lateral 2        | Inner Marginal 3 |          |    |         | 0.0039* |
|  |  | Outer Marginal 3 | Lateral 1        |          |    |         | 0.0003* |
|  |  | Outer Marginal 2 | Lateral 1        |          |    |         | 0.0007* |
|  |  | Lateral 2        | Central 2        |          |    |         | 0.0273* |
|  |  | Lateral 3        | Inner Marginal 2 |          |    |         | 0.2766  |
|  |  | Inner Marginal 2 | Inner Marginal 1 |          |    |         | 0.0358* |
|  |  | Inner Marginal 3 | Inner Marginal 1 |          |    |         | 0.0358* |
|  |  | Outer Marginal 3 | Inner Marginal 1 |          |    |         | 0.0354* |
|  |  | Outer Marginal 3 | Outer Marginal 1 |          |    |         | 0.0354* |
|  |  | Outer Marginal 2 | Inner Marginal 1 |          |    |         | 0.0413* |
|  |  | Outer Marginal 2 | Outer Marginal 1 |          |    |         | 0.0413* |
|  |  | Inner Marginal 2 | Central 2        |          |    |         | 0.0781  |
|  |  | Lateral 2        | Inner Marginal 2 |          |    |         | 0.4240  |
|  |  | Outer Marginal 2 | Inner Marginal 3 |          |    |         | 0.3225  |
|  |  | Outer Marginal 2 | Central 2        |          |    |         | 0.5310  |
|  |  | Outer Marginal 1 | Lateral 1        |          |    |         | 0.7934  |
|  |  | Outer Marginal 1 | Inner Marginal 1 |          |    |         | 0.6985  |
|  |  | Lateral 3        | Lateral 2        |          |    |         | 0.9513  |
|  |  | Lateral 1        | Inner Marginal 1 |          |    |         | 1.0000  |
|  |  | Outer Marginal 2 | Inner Marginal 2 |          |    |         | 0.5310  |
|  |  | Inner Marginal 3 | Central 2        | 74.5733  | 10 | <.0001* | 0.5067  |
|  |  | Outer Marginal 3 | Inner Marginal 3 |          |    |         | 0.1744  |
|  |  | Outer Marginal 2 | Lateral 2        |          |    |         | 0.2813  |
|  |  | Outer Marginal 3 | Central 2        |          |    |         | 0.1656  |
|  |  | Outer Marginal 3 | Outer Marginal 2 |          |    |         | 0.1060  |
|  |  | Inner Marginal 1 | Central 2        |          |    |         | 0.0358* |
|  |  | Outer Marginal 1 | Central 2        |          |    |         | 0.0358* |
|  |  | Outer Marginal 1 | Inner Marginal 2 |          |    |         | 0.0358* |
|  |  | Outer Marginal 1 | Inner Marginal 3 |          |    |         | 0.0358* |
|  |  | Outer Marginal 2 | Lateral 3        |          |    |         | 0.2942  |
|  |  | Inner Marginal 3 | Inner Marginal 2 |          |    |         | 0.0111* |
|  |  | Lateral 2        | Central 3        |          |    |         | 0.0559  |
|  |  | Outer Marginal 2 | Central 3        |          |    |         | 0.0121* |
|  |  | Outer Marginal 3 | Inner Marginal 2 |          |    |         | 0.0013* |
|  |  | Inner Marginal 2 | Central 3        |          |    |         | 0.0064* |
|  |  | Lateral 1        | Central 2        |          |    |         | 0.0002* |
|  |  | Lateral 1        | Inner Marginal 2 |          |    |         | 0.0002* |
|  |  | Lateral 1        | Inner Marginal 3 |          |    |         | 0.0002* |
|  |  | Inner Marginal 1 | Central 3        |          |    |         | 0.0259* |
|  |  | Outer Marginal 1 | Central 3        |          |    |         | 0.0259* |
|  |  | Outer Marginal 1 | Lateral 2        |          |    |         | 0.0242* |
|  |  | Outer Marginal 3 | Lateral 2        |          |    |         | 0.0007* |
|  |  | Lateral 1        | Central 3        |          |    |         | <.0001* |
|  |  | Inner Marginal 3 | Central 3        |          |    |         | <.0001* |
|  |  | Outer Marginal 3 | Central 3        |          |    |         | <.0001* |
|  |  | Lateral 3        | Central 3        |          |    |         | 0.0015* |
|  |  | Outer Marginal 3 | Lateral 3        |          |    |         | <.0001* |
|  |  | Outer Marginal 1 | Lateral 3        |          |    |         | 0.0198* |
|  |  | Lateral 3        | Lateral 1        |          |    |         | <.0001* |
|  |  | Lateral 3        | Inner Marginal 1 |          |    |         | <.0001* |
|  |  | Lateral 3        | Central 1        |          |    |         | <.0001* |
|  |  | Lateral 3        | Inner Marginal 3 |          |    |         | <.0001* |
|  |  | Lateral 3        | Central 2        |          |    |         | 0.0001* |
|  |  | Lateral 2        | Lateral 1        |          |    |         | <.0001* |
|  |  | Lateral 2        | Inner Marginal 1 |          |    |         | <.0001* |
|  |  | Lateral 3        | Lateral 2        |          |    |         | 0.0092* |
|  |  | Lateral 2        | Central 1        |          |    |         | <.0001* |
|  |  | Lateral 3        | Inner Marginal 2 |          |    |         | 0.0263* |
|  |  | Central 3        | Central 2        |          |    |         | <.0001* |
|  |  | Central 3        | Central 1        |          |    |         | 0.0001* |
|  |  | Lateral 2        | Inner Marginal 3 |          |    |         | 0.0013* |
|  |  | Inner Marginal 2 | Inner Marginal 1 |          |    |         | 0.0001* |
|  |  | Inner Marginal 3 | Inner Marginal 1 |          |    |         | 0.0001* |
|  |  | Outer Marginal 3 | Inner Marginal 1 |          |    |         | 0.0001* |
|  |  | Outer Marginal 2 | Lateral 1        |          |    |         | 0.0003* |
|  |  | Outer Marginal 3 | Outer Marginal 1 | 135.5405 | 11 | <.0001* | 0.0002* |
|  |  | Outer Marginal 2 | Inner Marginal 1 |          |    |         | 0.0003* |
|  |  | Central 2        | Central 1        |          |    |         | 0.0004* |
|  |  | Inner Marginal 2 | Central 1        |          |    |         | 0.0004* |
|  |  | Inner Marginal 3 | Central 1        |          |    |         | 0.0004* |
|  |  | Outer Marginal 3 | Central 1        |          |    |         | 0.0004* |
|  |  | Outer Marginal 3 | Lateral 1        |          |    |         | 0.0016* |
|  |  | Outer Marginal 2 | Outer Marginal 1 |          |    |         | 0.0004* |
|  |  | Outer Marginal 2 | Central 1        |          |    |         | 0.0008* |
|  |  | Lateral 1        | Central 1        |          |    |         | 0.0200* |
|  |  | Outer Marginal 2 | Inner Marginal 3 |          |    |         | 0.0518  |
|  |  | Lateral 1        | Inner Marginal 1 |          |    |         | 0.0942  |
|  |  | Inner Marginal 2 | Central 2        |          |    |         | 0.2252  |
|  |  | Lateral 2        | Central 2        |          |    |         | 0.3944  |
|  |  | Outer Marginal 1 | Inner Marginal 1 |          |    |         | 0.3603  |
|  |  | Outer Marginal 1 | Central 1        |          |    |         | 0.3537  |
|  |  | Inner Marginal 1 | Central 1        |          |    |         | 1.0000  |
|  |  | Outer Marginal 2 | Central 2        |          |    |         | 0.9212  |



|                    |            |                  |                  |        |   |         |            |         |
|--------------------|------------|------------------|------------------|--------|---|---------|------------|---------|
|                    |            | Lateral 2        | Inner Marginal 2 |        |   |         | 0.8620     |         |
|                    |            | Outer Marginal 3 | Inner Marginal 3 |        |   |         | 0.5834     |         |
|                    |            | Outer Marginal 2 | Inner Marginal 2 |        |   |         | 0.4681     |         |
|                    |            | Outer Marginal 1 | Lateral 1        |        |   |         | 0.2797     |         |
|                    |            | Outer Marginal 2 | Lateral 2        |        |   |         | 0.3887     |         |
|                    |            | Outer Marginal 3 | Outer Marginal 2 |        |   |         | 0.0068*    |         |
|                    |            | Inner Marginal 3 | Inner Marginal 2 |        |   |         | 0.0035*    |         |
|                    |            | Inner Marginal 3 | Central 2        |        |   |         | 0.0024*    |         |
|                    |            | Lateral 1        | Inner Marginal 3 |        |   |         | 0.0009*    |         |
|                    |            | Outer Marginal 1 | Central 2        |        |   |         | 0.0002*    |         |
|                    |            | Outer Marginal 1 | Inner Marginal 2 |        |   |         | 0.0002*    |         |
|                    |            | Outer Marginal 1 | Inner Marginal 3 |        |   |         | 0.0002*    |         |
|                    |            | Inner Marginal 1 | Central 2        |        |   |         | 0.0001*    |         |
|                    |            | Outer Marginal 3 | Inner Marginal 2 |        |   |         | 0.0002*    |         |
|                    |            | Outer Marginal 3 | Central 2        |        |   |         | 0.0002*    |         |
|                    |            | Inner Marginal 2 | Central 3        |        |   |         | 0.0015*    |         |
|                    |            | Outer Marginal 2 | Central 3        |        |   |         | 0.0010*    |         |
|                    |            | Lateral 1        | Inner Marginal 2 |        |   |         | <.0001*    |         |
|                    |            | Lateral 1        | Central 2        |        |   |         | <.0001*    |         |
|                    |            | Lateral 3        | Central 3        |        |   |         | 0.0282*    |         |
|                    |            | Lateral 2        | Central 3        |        |   |         | 0.0005*    |         |
|                    |            | Outer Marginal 1 | Central 3        |        |   |         | <.0001*    |         |
|                    |            | Inner Marginal 3 | Central 3        |        |   |         | <.0001*    |         |
|                    |            | Inner Marginal 1 | Central 3        |        |   |         | <.0001*    |         |
|                    |            | Outer Marginal 3 | Lateral 2        |        |   |         | <.0001*    |         |
|                    |            | Outer Marginal 1 | Lateral 2        |        |   |         | <.0001*    |         |
|                    |            | Lateral 1        | Central 3        |        |   |         | <.0001*    |         |
|                    |            | Outer Marginal 3 | Central 3        |        |   |         | <.0001*    |         |
|                    |            | Outer Marginal 2 | Lateral 3        |        |   |         | 0.0052*    |         |
| Outer Marginal 1   | Lateral 3  | <.0001*          |                  |        |   |         |            |         |
| Outer Marginal 3   | Lateral 3  | <.0001*          |                  |        |   |         |            |         |
| Littorina littorea | F          | Lateral 3        | Central 4        | 9.0759 | 3 | 0.0283* | 0.3447     |         |
|                    |            | Lateral 4        | Central 4        |        |   |         | 0.2925     |         |
|                    |            | Marginal 4       | Lateral 3        |        |   |         | 0.0678     |         |
|                    |            | Lateral 4        | Lateral 3        |        |   |         | 0.1400     |         |
|                    |            | Marginal 4       | Lateral 4        |        |   |         | 0.0267*    |         |
|                    |            | Marginal 4       | Central 4        |        |   |         | 0.0258*    |         |
|                    | Na         |                  | Lateral 3        |        |   |         | Central 4  | <.0001* |
|                    |            |                  | Marginal 2       |        |   |         | Central 4  | 0.0008* |
|                    |            |                  | Lateral 2        |        |   |         | Central 4  | 0.0074* |
|                    |            |                  | Marginal 3       |        |   |         | Central 4  | 0.0208* |
|                    |            |                  | Lateral 3        |        |   |         | Central 2  | 0.0072* |
|                    |            |                  | Lateral 3        |        |   |         | Central 1  | 0.1644  |
|                    |            |                  | Lateral 3        |        |   |         | Lateral 1  | 0.0254* |
|                    |            |                  | Lateral 4        |        |   |         | Central 4  | 0.0245* |
|                    |            |                  | Lateral 4        |        |   |         | Central 1  | 0.1253  |
|                    |            |                  | Marginal 2       |        |   |         | Lateral 4  | 0.0173* |
|                    |            |                  | Marginal 3       |        |   |         | Lateral 4  | 0.0652  |
|                    |            |                  | Central 3        |        |   |         | Central 2  | 0.0359* |
|                    |            |                  | Central 2        |        |   |         | Central 1  | 0.1547  |
|                    |            |                  | Marginal 3       |        |   |         | Marginal 1 | 0.0287* |
|                    |            |                  | Marginal 2       |        |   |         | Central 1  | 0.1625  |
|                    |            |                  | Marginal 3       |        |   |         | Lateral 3  | 0.2553  |
|                    |            |                  | Lateral 3        |        |   |         | Lateral 2  | 0.2131  |
|                    |            |                  | Marginal 2       |        |   |         | Marginal 1 | 0.0887  |
|                    |            |                  | Marginal 3       |        |   |         | Central 2  | 0.1039  |
|                    |            |                  | Marginal 2       |        |   |         | Lateral 1  | 0.1218  |
|                    |            |                  | Lateral 4        |        |   |         | Lateral 1  | 0.2768  |
|                    |            |                  | Lateral 2        |        |   |         | Lateral 1  | 0.0882  |
|                    |            |                  | Central 3        |        |   |         | Central 1  | 0.1904  |
|                    |            |                  | Lateral 2        |        |   |         | Central 1  | 0.1904  |
|                    |            |                  | Marginal 3       |        |   |         | Lateral 1  | 0.0606  |
|                    |            |                  | Central 4        |        |   |         | Central 1  | 0.6507  |
|                    |            |                  | Marginal 3       |        |   |         | Marginal 2 | 0.1891  |
|                    |            |                  | Marginal 3       |        |   |         | Lateral 2  | 0.1564  |
|                    |            |                  | Marginal 1       |        |   |         | Central 1  | 0.2636  |
| Marginal 3         |            |                  | Central 3        | 0.1849 |   |         |            |         |
| Lateral 2          |            |                  | Central 2        | 0.2828 |   |         |            |         |
| Marginal 2         | Central 2  | 0.3268           |                  |        |   |         |            |         |
| Marginal 3         | Central 1  | 0.2888           |                  |        |   |         |            |         |
| Lateral 3          | Central 3  | 0.5820           |                  |        |   |         |            |         |
| Marginal 1         | Central 4  | 0.7209           |                  |        |   |         |            |         |
| Lateral 1          | Central 1  | 0.4682           |                  |        |   |         |            |         |
| Lateral 1          | Central 4  | 0.9150           |                  |        |   |         |            |         |
| Marginal 1         | Lateral 1  | 0.8455           |                  |        |   |         |            |         |
| Marginal 2         | Lateral 2  | 0.9155           |                  |        |   |         |            |         |
| Lateral 2          | Central 3  | 0.6544           |                  |        |   |         |            |         |
| Marginal 2         | Central 3  | 0.6711           |                  |        |   |         |            |         |
| Marginal 4         | Central 1  | 0.2113           |                  |        |   |         |            |         |
| Marginal 2         | Lateral 3  | 0.3495           |                  |        |   |         |            |         |
| Lateral 1          | Central 2  | 0.2026           |                  |        |   |         |            |         |
| Marginal 1         | Lateral 4  | 0.2998           |                  |        |   |         |            |         |
| Marginal 1         | Central 2  | 0.1861           |                  |        |   |         |            |         |
| Lateral 1          | Central 3  | 0.0472*          |                  |        |   |         |            |         |
| Marginal 1         | Lateral 2  | 0.0537           |                  |        |   |         |            |         |
| Marginal 4         | Lateral 1  | 0.0142*          |                  |        |   |         |            |         |
| Marginal 4         | Marginal 3 | 0.0142*          |                  |        |   |         |            |         |
| Marginal 1         | Central 3  | 0.0210*          |                  |        |   |         |            |         |
| Lateral 4          | Central 2  | 0.0612           |                  |        |   |         |            |         |
| Marginal 4         | Central 3  | 0.0034*          |                  |        |   |         |            |         |
| Marginal 4         | Lateral 2  | 0.0034*          |                  |        |   |         |            |         |
| Marginal 4         | Marginal 1 | 0.0033*          |                  |        |   |         |            |         |
| Lateral 4          | Lateral 2  | 0.0324*          |                  |        |   |         |            |         |
| Marginal 4         | Marginal 2 | 0.0018*          |                  |        |   |         |            |         |

|  |  |            |            |         |    |         |         |
|--|--|------------|------------|---------|----|---------|---------|
|  |  | Marginal 4 | Central 2  |         |    |         | 0.0014* |
|  |  | Lateral 4  | Central 3  |         |    |         | 0.0036* |
|  |  | Marginal 1 | Lateral 3  |         |    |         | 0.0064* |
|  |  | Central 4  | Central 2  |         |    |         | 0.0028* |
|  |  | Marginal 4 | Lateral 4  |         |    |         | 0.0005* |
|  |  | Central 4  | Central 3  |         |    |         | 0.0008* |
|  |  | Marginal 4 | Lateral 3  |         |    |         | 0.0003* |
|  |  | Lateral 4  | Lateral 3  |         |    |         | <.0001* |
|  |  | Marginal 4 | Central 4  |         |    |         | 0.0002* |
|  |  | Central 4  | Central 2  |         |    |         | 0.0184* |
|  |  | Central 4  | Central 3  |         |    |         | 0.0065* |
|  |  | Lateral 4  | Lateral 3  |         |    |         | 0.0151* |
|  |  | Central 4  | Central 1  |         |    |         | 0.0402* |
|  |  | Marginal 1 | Lateral 3  |         |    |         | 0.0705  |
|  |  | Marginal 1 | Central 2  |         |    |         | 0.0216* |
|  |  | Lateral 3  | Central 2  |         |    |         | 0.2693  |
|  |  | Lateral 4  | Central 3  |         |    |         | 0.0536  |
|  |  | Lateral 4  | Central 2  |         |    |         | 0.1047  |
|  |  | Marginal 1 | Central 3  |         |    |         | 0.0459* |
|  |  | Lateral 4  | Central 1  |         |    |         | 0.1367  |
|  |  | Lateral 4  | Lateral 1  |         |    |         | 0.1723  |
|  |  | Marginal 1 | Central 1  |         |    |         | 0.1482  |
|  |  | Lateral 1  | Central 2  |         |    |         | 0.0919  |
|  |  | Central 3  | Central 2  |         |    |         | 0.1836  |
|  |  | Lateral 1  | Central 3  |         |    |         | 0.2714  |
|  |  | Lateral 1  | Central 1  |         |    |         | 0.4537  |
|  |  | Marginal 1 | Lateral 1  |         |    |         | 0.7228  |
|  |  | Marginal 2 | Central 2  |         |    |         | 0.8571  |
|  |  | Marginal 4 | Marginal 3 |         |    |         | 1.0000  |
|  |  | Lateral 3  | Central 3  |         |    |         | 0.9543  |
|  |  | Central 3  | Central 1  |         |    |         | 0.8257  |
|  |  | Marginal 2 | Central 3  |         |    |         | 0.5515  |
|  |  | Marginal 3 | Central 2  |         |    |         | 0.3711  |
|  |  | Marginal 2 | Central 1  |         |    |         | 0.4587  |
|  |  | Marginal 3 | Marginal 2 |         |    |         | 0.2888  |
|  |  | Lateral 3  | Central 1  |         |    |         | 0.6329  |
|  |  | Marginal 2 | Lateral 1  | 50.4065 | 10 | <.0001* | 0.2395  |
|  |  | Marginal 3 | Central 1  |         |    |         | 0.2348  |
|  |  | Central 2  | Central 1  |         |    |         | 0.1337  |
|  |  | Marginal 3 | Lateral 1  |         |    |         | 0.2072  |
|  |  | Marginal 2 | Lateral 3  |         |    |         | 0.5116  |
|  |  | Marginal 3 | Central 3  |         |    |         | 0.1734  |
|  |  | Lateral 3  | Lateral 1  |         |    |         | 0.3538  |
|  |  | Lateral 4  | Central 4  |         |    |         | 0.2633  |
|  |  | Marginal 1 | Lateral 4  |         |    |         | 0.1190  |
|  |  | Marginal 2 | Marginal 1 |         |    |         | 0.0776  |
|  |  | Marginal 2 | Lateral 4  |         |    |         | 0.1187  |
|  |  | Marginal 4 | Central 2  |         |    |         | 0.1183  |
|  |  | Marginal 3 | Marginal 1 |         |    |         | 0.1340  |
|  |  | Marginal 3 | Lateral 4  |         |    |         | 0.1840  |
|  |  | Marginal 4 | Marginal 2 |         |    |         | 0.0498* |
|  |  | Lateral 1  | Central 4  |         |    |         | 0.0517  |
|  |  | Marginal 1 | Central 4  |         |    |         | 0.0269* |
|  |  | Marginal 4 | Central 1  |         |    |         | 0.0111* |
|  |  | Marginal 4 | Central 3  |         |    |         | 0.0042* |
|  |  | Marginal 4 | Lateral 1  |         |    |         | 0.0041* |
|  |  | Marginal 2 | Central 4  |         |    |         | 0.0180* |
|  |  | Marginal 3 | Lateral 3  |         |    |         | 0.1684  |
|  |  | Marginal 3 | Central 4  |         |    |         | 0.1103  |
|  |  | Marginal 4 | Lateral 4  |         |    |         | 0.0003* |
|  |  | Marginal 4 | Marginal 1 |         |    |         | 0.0001* |
|  |  | Marginal 4 | Lateral 3  |         |    |         | 0.0003* |
|  |  | Lateral 3  | Central 4  |         |    |         | 0.0001* |
|  |  | Marginal 4 | Central 4  |         |    |         | <.0001* |
|  |  | Lateral 3  | Lateral 2  |         |    |         | 0.0251* |
|  |  | Lateral 3  | Central 1  |         |    |         | 0.1026  |
|  |  | Lateral 3  | Central 2  |         |    |         | 0.1026  |
|  |  | Lateral 3  | Lateral 1  |         |    |         | 0.1026  |
|  |  | Lateral 3  | Central 3  |         |    |         | 0.0113* |
|  |  | Central 4  | Central 1  |         |    |         | 0.1108  |
|  |  | Central 4  | Central 2  |         |    |         | 0.1108  |
|  |  | Central 4  | Central 3  |         |    |         | 0.0076* |
|  |  | Lateral 4  | Lateral 2  |         |    |         | 0.0294* |
|  |  | Lateral 4  | Central 1  |         |    |         | 0.1258  |
|  |  | Lateral 4  | Central 2  |         |    |         | 0.1258  |
|  |  | Lateral 4  | Lateral 1  |         |    |         | 0.1258  |
|  |  | Marginal 4 | Central 2  |         |    |         | 0.1253  |
|  |  | Marginal 4 | Marginal 2 |         |    |         | 0.1253  |
|  |  | Marginal 3 | Lateral 2  | 58.0894 | 11 | <.0001* | 0.0321* |
|  |  | Marginal 3 | Central 1  |         |    |         | 0.1325  |
|  |  | Marginal 3 | Central 2  |         |    |         | 0.1325  |
|  |  | Marginal 3 | Lateral 1  |         |    |         | 0.1325  |
|  |  | Marginal 3 | Marginal 1 |         |    |         | 0.1325  |
|  |  | Marginal 3 | Marginal 2 |         |    |         | 0.1325  |
|  |  | Marginal 4 | Central 1  |         |    |         | 0.2610  |
|  |  | Marginal 4 | Lateral 1  |         |    |         | 0.2610  |
|  |  | Marginal 4 | Marginal 1 |         |    |         | 0.2610  |
|  |  | Marginal 3 | Central 3  |         |    |         | 0.1270  |
|  |  | Lateral 4  | Central 3  |         |    |         | 0.2233  |
|  |  | Marginal 4 | Lateral 2  |         |    |         | 0.4392  |
|  |  | Central 3  | Central 1  |         |    |         | 0.2113  |
|  |  | Central 3  | Central 2  |         |    |         | 0.2113  |
|  |  | Lateral 2  | Central 2  |         |    |         | 0.5403  |
|  |  | Marginal 3 | Lateral 4  |         |    |         | 0.8190  |

|  |  |            |            |         |    |         |         |
|--|--|------------|------------|---------|----|---------|---------|
|  |  | Central 2  | Central 1  |         |    |         | 1.0000  |
|  |  | Lateral 1  | Central 1  |         |    |         | 1.0000  |
|  |  | Lateral 1  | Central 2  |         |    |         | 1.0000  |
|  |  | Lateral 2  | Central 1  |         |    |         | 1.0000  |
|  |  | Lateral 2  | Lateral 1  |         |    |         | 1.0000  |
|  |  | Marginal 1 | Central 1  |         |    |         | 1.0000  |
|  |  | Marginal 1 | Central 2  |         |    |         | 1.0000  |
|  |  | Marginal 1 | Lateral 1  |         |    |         | 1.0000  |
|  |  | Marginal 1 | Lateral 2  |         |    |         | 1.0000  |
|  |  | Marginal 2 | Central 1  |         |    |         | 1.0000  |
|  |  | Marginal 2 | Central 2  |         |    |         | 1.0000  |
|  |  | Marginal 2 | Lateral 1  |         |    |         | 1.0000  |
|  |  | Marginal 2 | Marginal 1 |         |    |         | 1.0000  |
|  |  | Marginal 2 | Lateral 2  |         |    |         | 0.5403  |
|  |  | Lateral 3  | Central 4  |         |    |         | 0.6918  |
|  |  | Lateral 2  | Central 3  |         |    |         | 0.2433  |
|  |  | Lateral 1  | Central 3  |         |    |         | 0.2113  |
|  |  | Marginal 1 | Central 3  |         |    |         | 0.2113  |
|  |  | Marginal 2 | Central 3  |         |    |         | 0.2113  |
|  |  | Marginal 3 | Lateral 3  |         |    |         | 0.2131  |
|  |  | Marginal 3 | Central 4  |         |    |         | 0.1421  |
|  |  | Marginal 4 | Central 3  |         |    |         | 0.0504  |
|  |  | Lateral 4  | Central 4  |         |    |         | 0.0586  |
|  |  | Lateral 4  | Lateral 3  |         |    |         | 0.0900  |
|  |  | Marginal 1 | Lateral 4  |         |    |         | 0.1258  |
|  |  | Marginal 2 | Lateral 4  |         |    |         | 0.1258  |
|  |  | Lateral 1  | Central 4  |         |    |         | 0.1108  |
|  |  | Marginal 1 | Central 4  |         |    |         | 0.1108  |
|  |  | Marginal 2 | Central 4  |         |    |         | 0.1108  |
|  |  | Lateral 2  | Central 4  |         |    |         | 0.0237* |
|  |  | Marginal 4 | Marginal 3 |         |    |         | <.0001* |
|  |  | Marginal 4 | Lateral 4  |         |    |         | <.0001* |
|  |  | Marginal 1 | Lateral 3  |         |    |         | 0.1026  |
|  |  | Marginal 2 | Lateral 3  |         |    |         | 0.1026  |
|  |  | Marginal 4 | Central 4  |         |    |         | <.0001* |
|  |  | Marginal 4 | Lateral 3  |         |    |         | <.0001* |
|  |  | Lateral 3  | Central 2  |         |    |         | 0.0024* |
|  |  | Lateral 3  | Lateral 1  |         |    |         | 0.0214* |
|  |  | Lateral 3  | Central 1  |         |    |         | 0.1042  |
|  |  | Lateral 3  | Lateral 2  |         |    |         | 0.0091* |
|  |  | Central 4  | Central 2  |         |    |         | 0.0035* |
|  |  | Central 4  | Central 1  |         |    |         | 0.1108  |
|  |  | Marginal 4 | Central 2  |         |    |         | 0.0043* |
|  |  | Lateral 4  | Lateral 2  |         |    |         | 0.0015* |
|  |  | Marginal 4 | Marginal 1 |         |    |         | 0.0032* |
|  |  | Lateral 4  | Central 2  |         |    |         | 0.0029* |
|  |  | Marginal 4 | Lateral 1  |         |    |         | 0.0275* |
|  |  | Marginal 4 | Central 1  |         |    |         | 0.1207  |
|  |  | Lateral 4  | Lateral 1  |         |    |         | 0.0294* |
|  |  | Lateral 4  | Central 1  |         |    |         | 0.1256  |
|  |  | Marginal 4 | Marginal 2 |         |    |         | 0.0403* |
|  |  | Central 4  | Central 3  |         |    |         | 0.0764  |
|  |  | Marginal 4 | Lateral 2  |         |    |         | 0.1089  |
|  |  | Central 3  | Central 2  |         |    |         | 0.0107* |
|  |  | Marginal 3 | Marginal 1 |         |    |         | 0.0175* |
|  |  | Marginal 3 | Marginal 2 |         |    |         | 0.0195* |
|  |  | Marginal 3 | Lateral 2  |         |    |         | 0.0365* |
|  |  | Marginal 3 | Central 2  |         |    |         | 0.0294* |
|  |  | Lateral 4  | Lateral 3  |         |    |         | 0.4060  |
|  |  | Central 3  | Central 1  |         |    |         | 0.1904  |
|  |  | Marginal 2 | Marginal 1 |         |    |         | 0.0714  |
|  |  | Lateral 2  | Central 2  |         |    |         | 0.0662  |
|  |  | Lateral 4  | Central 3  |         |    |         | 0.3003  |
|  |  | Lateral 2  | Lateral 1  |         |    |         | 0.0814  |
|  |  | Marginal 2 | Lateral 1  |         |    |         | 0.1180  |
|  |  | Marginal 2 | Central 2  | 55.8509 | 11 | <.0001* | 0.1400  |
|  |  | Marginal 3 | Lateral 1  |         |    |         | 0.1002  |
|  |  | Lateral 2  | Central 1  |         |    |         | 0.2416  |
|  |  | Marginal 2 | Central 1  |         |    |         | 0.2416  |
|  |  | Lateral 3  | Central 3  |         |    |         | 0.6650  |
|  |  | Central 2  | Central 1  |         |    |         | 0.2888  |
|  |  | Marginal 3 | Central 1  |         |    |         | 0.2765  |
|  |  | Marginal 1 | Central 1  |         |    |         | 0.7290  |
|  |  | Lateral 1  | Central 1  |         |    |         | 1.0000  |
|  |  | Marginal 1 | Lateral 1  |         |    |         | 1.0000  |
|  |  | Marginal 2 | Lateral 2  |         |    |         | 0.7533  |
|  |  | Lateral 4  | Central 4  |         |    |         | 0.6487  |
|  |  | Lateral 1  | Central 2  |         |    |         | 0.1588  |
|  |  | Marginal 1 | Central 2  |         |    |         | 0.2109  |
|  |  | Marginal 3 | Central 3  |         |    |         | 0.2183  |
|  |  | Marginal 4 | Marginal 3 |         |    |         | 0.4692  |
|  |  | Marginal 1 | Lateral 2  |         |    |         | 0.0714  |
|  |  | Lateral 1  | Central 3  |         |    |         | 0.0570  |
|  |  | Marginal 3 | Lateral 3  |         |    |         | 0.3506  |
|  |  | Lateral 2  | Central 3  |         |    |         | 0.0094* |
|  |  | Lateral 3  | Central 4  |         |    |         | 0.2059  |
|  |  | Marginal 1 | Central 3  |         |    |         | 0.0054* |
|  |  | Marginal 2 | Central 3  |         |    |         | 0.0058* |
|  |  | Marginal 4 | Central 3  |         |    |         | 0.0742  |
|  |  | Marginal 3 | Lateral 4  |         |    |         | 0.0652  |
|  |  | Marginal 3 | Central 4  |         |    |         | 0.0819  |
|  |  | Marginal 4 | Lateral 3  |         |    |         | 0.0302* |
|  |  | Marginal 4 | Lateral 4  |         |    |         | 0.0030* |
|  |  | Marginal 1 | Lateral 4  |         |    |         | 0.0011* |

|  |  |            |            |          |    |         |         |
|--|--|------------|------------|----------|----|---------|---------|
|  |  | Marginal 2 | Lateral 4  |          |    |         | 0.0011* |
|  |  | Marginal 4 | Central 4  |          |    |         | 0.0016* |
|  |  | Lateral 2  | Central 4  |          |    |         | 0.0035* |
|  |  | Lateral 1  | Central 4  |          |    |         | 0.0237* |
|  |  | Marginal 2 | Central 4  |          |    |         | 0.0020* |
|  |  | Marginal 1 | Central 4  |          |    |         | 0.0009* |
|  |  | Marginal 2 | Lateral 3  |          |    |         | 0.0042* |
|  |  | Marginal 1 | Lateral 3  |          |    |         | 0.0010* |
|  |  | Lateral 3  | Central 4  |          |    |         | <.0001* |
|  |  | Marginal 2 | Central 4  |          |    |         | <.0001* |
|  |  | Marginal 1 | Central 4  |          |    |         | <.0001* |
|  |  | Lateral 4  | Central 4  |          |    |         | <.0001* |
|  |  | Marginal 3 | Central 4  |          |    |         | <.0001* |
|  |  | Lateral 3  | Lateral 1  |          |    |         | 0.0038* |
|  |  | Lateral 2  | Central 4  |          |    |         | <.0001* |
|  |  | Lateral 3  | Central 1  |          |    |         | 0.0124* |
|  |  | Lateral 1  | Central 4  |          |    |         | 0.0002* |
|  |  | Marginal 2 | Lateral 4  |          |    |         | <.0001* |
|  |  | Marginal 1 | Lateral 4  |          |    |         | <.0001* |
|  |  | Marginal 3 | Lateral 4  |          |    |         | <.0001* |
|  |  | Marginal 2 | Marginal 1 |          |    |         | 0.0056* |
|  |  | Marginal 2 | Lateral 1  |          |    |         | 0.0109* |
|  |  | Lateral 2  | Lateral 1  |          |    |         | 0.0037* |
|  |  | Marginal 3 | Marginal 1 |          |    |         | 0.0319* |
|  |  | Central 2  | Central 1  |          |    |         | 0.0174* |
|  |  | Marginal 2 | Central 1  |          |    |         | 0.0611  |
|  |  | Marginal 3 | Lateral 1  |          |    |         | 0.0786  |
|  |  | Lateral 2  | Central 1  |          |    |         | 0.0481* |
|  |  | Marginal 3 | Central 1  |          |    |         | 0.1408  |
|  |  | Central 3  | Central 1  |          |    |         | 0.3083  |
|  |  | Marginal 1 | Central 1  |          |    |         | 0.8817  |
|  |  | Lateral 1  | Central 1  |          |    |         | 1.0000  |
|  |  | Marginal 1 | Lateral 1  |          |    |         | 1.0000  |
|  |  | Marginal 3 | Marginal 2 |          |    |         | 1.0000  |
|  |  | Marginal 3 | Central 3  |          |    |         | 0.7242  |
|  |  | Marginal 2 | Lateral 3  | 105.7584 | 10 | <.0001* | 0.8037  |
|  |  | Lateral 3  | Central 3  |          |    |         | 0.7777  |
|  |  | Marginal 3 | Lateral 3  |          |    |         | 0.7553  |
|  |  | Marginal 3 | Lateral 2  |          |    |         | 0.4828  |
|  |  | Marginal 2 | Central 3  |          |    |         | 0.5579  |
|  |  | Lateral 2  | Central 3  |          |    |         | 0.5407  |
|  |  | Lateral 2  | Central 2  |          |    |         | 0.2829  |
|  |  | Marginal 2 | Lateral 2  |          |    |         | 0.2934  |
|  |  | Marginal 3 | Central 2  |          |    |         | 0.2504  |
|  |  | Lateral 3  | Lateral 2  |          |    |         | 0.5331  |
|  |  | Central 3  | Central 2  |          |    |         | 0.2688  |
|  |  | Marginal 2 | Central 2  |          |    |         | 0.1642  |
|  |  | Lateral 1  | Central 3  |          |    |         | 0.0741  |
|  |  | Marginal 1 | Central 3  |          |    |         | 0.0541  |
|  |  | Lateral 1  | Central 2  |          |    |         | 0.0066* |
|  |  | Lateral 3  | Central 2  |          |    |         | 0.1373  |
|  |  | Marginal 1 | Lateral 2  |          |    |         | 0.0016* |
|  |  | Marginal 1 | Central 2  |          |    |         | 0.0008* |
|  |  | Lateral 4  | Central 1  |          |    |         | 0.0011* |
|  |  | Lateral 4  | Lateral 1  |          |    |         | 0.0005* |
|  |  | Lateral 4  | Lateral 2  |          |    |         | <.0001* |
|  |  | Lateral 4  | Central 2  |          |    |         | <.0001* |
|  |  | Central 4  | Central 1  |          |    |         | 0.0006* |
|  |  | Lateral 4  | Central 3  |          |    |         | <.0001* |
|  |  | Central 4  | Central 2  |          |    |         | <.0001* |
|  |  | Marginal 1 | Lateral 3  |          |    |         | 0.0002* |
|  |  | Central 4  | Central 3  |          |    |         | <.0001* |
|  |  | Lateral 4  | Lateral 3  |          |    |         | <.0001* |
|  |  | Lateral 3  | Central 4  |          |    |         | 0.0274* |
|  |  | Marginal 3 | Lateral 3  |          |    |         | 0.0151* |
|  |  | Marginal 1 | Central 4  |          |    |         | 0.0437* |
|  |  | Marginal 3 | Central 2  |          |    |         | 0.0399* |
|  |  | Marginal 2 | Central 4  |          |    |         | 0.0896  |
|  |  | Marginal 2 | Lateral 3  |          |    |         | 0.2091  |
|  |  | Marginal 3 | Central 3  |          |    |         | 0.1685  |
|  |  | Marginal 2 | Central 2  |          |    |         | 0.1812  |
|  |  | Central 3  | Central 2  |          |    |         | 0.2447  |
|  |  | Lateral 1  | Central 4  |          |    |         | 0.0814  |
|  |  | Marginal 3 | Marginal 1 |          |    |         | 0.1878  |
|  |  | Lateral 2  | Central 4  |          |    |         | 0.1052  |
|  |  | Marginal 3 | Central 4  |          |    |         | 0.1052  |
|  |  | Marginal 3 | Central 1  |          |    |         | 0.1939  |
|  |  | Marginal 3 | Marginal 2 |          |    |         | 0.3502  |
|  |  | Lateral 1  | Central 2  | 12.0432  | 9  | 0.2109  | 0.4243  |
|  |  | Marginal 2 | Marginal 1 |          |    |         | 0.4995  |
|  |  | Marginal 3 | Lateral 1  |          |    |         | 0.3913  |
|  |  | Marginal 1 | Lateral 2  |          |    |         | 0.5876  |
|  |  | Marginal 3 | Lateral 2  |          |    |         | 0.4705  |
|  |  | Lateral 2  | Central 2  |          |    |         | 0.6198  |
|  |  | Marginal 1 | Central 2  |          |    |         | 0.6819  |
|  |  | Lateral 3  | Central 2  |          |    |         | 0.7811  |
|  |  | Central 3  | Central 1  |          |    |         | 0.7437  |
|  |  | Marginal 2 | Central 3  |          |    |         | 0.7724  |
|  |  | Marginal 2 | Central 1  |          |    |         | 0.7336  |
|  |  | Marginal 2 | Lateral 2  |          |    |         | 0.7989  |
|  |  | Lateral 1  | Central 1  |          |    |         | 1.0000  |
|  |  | Lateral 1  | Central 3  |          |    |         | 1.0000  |
|  |  | Lateral 3  | Lateral 2  |          |    |         | 1.0000  |
|  |  | Marginal 1 | Lateral 3  |          |    |         | 1.0000  |

|   |            |            |            |         |   |        |           |
|---|------------|------------|------------|---------|---|--------|-----------|
|   |            | Marginal 2 | Lateral 1  |         |   |        | 1.0000    |
|   |            | Lateral 2  | Central 3  |         |   |        | 0.9479    |
|   |            | Lateral 3  | Central 1  |         |   |        | 0.8926    |
|   |            | Central 2  | Central 1  |         |   |        | 0.7766    |
|   |            | Lateral 2  | Central 1  |         |   |        | 0.6650    |
|   |            | Marginal 1 | Central 1  |         |   |        | 0.6393    |
|   |            | Marginal 1 | Lateral 1  |         |   |        | 0.6363    |
|   |            | Lateral 2  | Lateral 1  |         |   |        | 0.5403    |
|   |            | Marginal 1 | Central 3  |         |   |        | 0.6479    |
|   |            | Lateral 3  | Lateral 1  |         |   |        | 0.5818    |
|   |            | Central 4  | Central 1  |         |   |        | 0.1052    |
|   |            | Central 4  | Central 2  |         |   |        | 0.1059    |
|   |            | Lateral 3  | Central 3  |         |   |        | 0.1373    |
|   |            | Central 4  | Central 3  |         |   |        | 0.0601    |
| K |            | Central 3  | Central 2  | 10.6864 | 9 | 0.2978 | 0.1386    |
|   |            | Lateral 3  | Central 1  |         |   |        | 0.3458    |
|   |            | Marginal 1 | Central 2  |         |   |        | 0.3758    |
|   |            | Lateral 4  | Central 1  |         |   |        | 0.4682    |
|   |            | Lateral 4  | Central 2  |         |   |        | 0.5959    |
|   |            | Central 3  | Central 1  |         |   |        | 0.4795    |
|   |            | Lateral 2  | Central 1  |         |   |        | 0.4795    |
|   |            | Marginal 1 | Lateral 3  |         |   |        | 0.6531    |
|   |            | Marginal 1 | Central 1  |         |   |        | 0.6171    |
|   |            | Marginal 2 | Central 1  |         |   |        | 0.7168    |
|   |            | Lateral 1  | Central 2  |         |   |        | 0.7728    |
|   |            | Lateral 2  | Central 2  |         |   |        | 0.7671    |
|   |            | Marginal 1 | Central 3  |         |   |        | 0.7609    |
|   |            | Marginal 1 | Lateral 2  |         |   |        | 0.7609    |
|   |            | Lateral 4  | Lateral 1  |         |   |        | 0.8116    |
|   |            | Lateral 4  | Lateral 3  |         |   |        | 0.8584    |
|   |            | Central 2  | Central 1  |         |   |        | 1.0000    |
|   |            | Lateral 1  | Central 1  |         |   |        | 1.0000    |
|   |            | Lateral 1  | Central 3  |         |   |        | 1.0000    |
|   |            | Lateral 2  | Lateral 1  |         |   |        | 1.0000    |
|   |            | Lateral 3  | Lateral 1  |         |   |        | 1.0000    |
|   |            | Lateral 4  | Central 3  |         |   |        | 1.0000    |
|   |            | Lateral 4  | Lateral 2  |         |   |        | 1.0000    |
|   |            | Marginal 1 | Lateral 1  |         |   |        | 1.0000    |
|   |            | Marginal 1 | Lateral 4  |         |   |        | 1.0000    |
|   |            | Marginal 2 | Lateral 1  |         |   |        | 0.8143    |
|   |            | Lateral 3  | Central 2  |         |   |        | 0.6579    |
|   | Ca         |            | Marginal 2 |         |   |        | Lateral 4 |
|   |            | Marginal 4 | Central 1  | 0.5403  |   |        |           |
|   |            | Marginal 2 | Central 2  | 0.4715  |   |        |           |
|   |            | Marginal 2 | Lateral 3  | 0.3681  |   |        |           |
|   |            | Marginal 2 | Marginal 1 | 0.3681  |   |        |           |
|   |            | Lateral 2  | Central 3  | 0.1939  |   |        |           |
|   |            | Marginal 4 | Central 3  | 0.2207  |   |        |           |
|   |            | Marginal 4 | Lateral 1  | 0.2453  |   |        |           |
|   |            | Marginal 4 | Lateral 2  | 0.2207  |   |        |           |
|   |            | Lateral 3  | Central 3  | 0.1281  |   |        |           |
|   |            | Lateral 3  | Lateral 2  | 0.1281  |   |        |           |
|   |            | Marginal 4 | Central 2  | 0.1489  |   |        |           |
|   |            | Marginal 4 | Lateral 3  | 0.1386  |   |        |           |
|   |            | Marginal 4 | Marginal 1 | 0.1386  |   |        |           |
|   |            | Marginal 2 | Central 3  | 0.0952  |   |        |           |
|   |            | Marginal 2 | Lateral 2  | 0.0952  |   |        |           |
|   |            | Marginal 4 | Lateral 4  | 0.1052  |   |        |           |
|   |            | Marginal 4 | Marginal 2 | 0.1002  |   |        |           |
|   |            | Lateral 3  | Central 2  | 0.0004* |   |        |           |
|   |            | Lateral 3  | Lateral 2  | 0.0010* |   |        |           |
|   |            | Central 4  | Central 2  | <.0001* |   |        |           |
|   |            | Lateral 4  | Central 2  | <.0001* |   |        |           |
|   |            | Lateral 4  | Lateral 3  | 0.0059* |   |        |           |
|   |            | Central 3  | Central 2  | 0.0001* |   |        |           |
|   |            | Lateral 4  | Lateral 2  | 0.0001* |   |        |           |
|   |            | Marginal 1 | Central 2  | 0.0002* |   |        |           |
|   |            | Marginal 1 | Lateral 2  | 0.0002* |   |        |           |
|   |            | Central 4  | Central 1  | 0.0166* |   |        |           |
|   |            | Marginal 3 | Lateral 2  | 0.0015* |   |        |           |
|   |            | Lateral 4  | Central 1  | 0.0044* |   |        |           |
|   |            | Marginal 3 | Central 2  | 0.0034* |   |        |           |
|   |            | Central 3  | Central 1  | 0.0187* |   |        |           |
|   |            | Lateral 4  | Lateral 1  | 0.0182* |   |        |           |
|   |            | Lateral 1  | Central 2  | 0.0088* |   |        |           |
|   |            | Marginal 2 | Lateral 2  | 0.0241* |   |        |           |
|   |            | Marginal 3 | Marginal 2 | 0.0627  |   |        |           |
|   |            | Marginal 2 | Central 2  | 0.0662  |   |        |           |
|   | Lateral 3  | Central 1  | 0.4052     |         |   |        |           |
|   | Lateral 3  | Lateral 1  | 0.7009     |         |   |        |           |
|   | Marginal 1 | Central 1  | 0.5187     |         |   |        |           |
|   | Marginal 4 | Lateral 2  | 0.7071     |         |   |        |           |
|   | Lateral 1  | Central 1  | 0.6466     |         |   |        |           |
|   | Marginal 3 | Lateral 1  | 0.7727     |         |   |        |           |
|   | Central 4  | Central 3  | 0.8323     |         |   |        |           |
|   | Marginal 1 | Lateral 1  | 1.0000     |         |   |        |           |
|   | Marginal 3 | Central 1  | 1.0000     |         |   |        |           |
|   | Marginal 4 | Central 2  | 1.0000     |         |   |        |           |
|   | Marginal 3 | Marginal 1 | 0.9806     |         |   |        |           |
|   | Marginal 3 | Lateral 3  | 0.9598     |         |   |        |           |
|   | Lateral 4  | Central 3  | 0.7320     |         |   |        |           |
|   | Lateral 2  | Central 2  | 0.5081     |         |   |        |           |
|   | Lateral 4  | Central 4  | 0.4644     |         |   |        |           |
|   | Marginal 1 | Lateral 3  | 0.5398     |         |   |        |           |

|  |  |            |                             |         |    |         |         |
|--|--|------------|-----------------------------|---------|----|---------|---------|
|  |  | Marginal 4 | Marginal 2                  |         |    |         | 0.2318  |
|  |  | Marginal 2 | Lateral 1                   |         |    |         | 0.0694  |
|  |  | Marginal 2 | Central 1                   |         |    |         | 0.0464* |
|  |  | Marginal 3 | Lateral 4                   |         |    |         | 0.0558  |
|  |  | Marginal 4 | Lateral 1                   |         |    |         | 0.0319* |
|  |  | Lateral 2  | Lateral 1                   |         |    |         | 0.0055* |
|  |  | Marginal 3 | Central 3                   |         |    |         | 0.0542  |
|  |  | Lateral 2  | Central 1                   |         |    |         | 0.0043* |
|  |  | Marginal 4 | Central 1                   |         |    |         | 0.0296* |
|  |  | Lateral 1  | Central 3                   |         |    |         | 0.0299* |
|  |  | Central 2  | Central 1                   |         |    |         | 0.0046* |
|  |  | Marginal 4 | Marginal 3                  |         |    |         | 0.0158* |
|  |  | Marginal 2 | Marginal 1                  |         |    |         | 0.0052* |
|  |  | Marginal 3 | Central 4                   |         |    |         | 0.0161* |
|  |  | Marginal 4 | Marginal 1                  |         |    |         | 0.0020* |
|  |  | Marginal 1 | Central 3                   |         |    |         | 0.0036* |
|  |  | Lateral 1  | Central 4                   |         |    |         | 0.0138* |
|  |  | Marginal 1 | Lateral 4                   |         |    |         | 0.0007* |
|  |  | Lateral 2  | Central 3                   |         |    |         | 0.0005* |
|  |  | Marginal 4 | Central 3                   |         |    |         | 0.0004* |
|  |  | Marginal 1 | Central 4                   |         |    |         | 0.0012* |
|  |  | Marginal 2 | Central 3                   |         |    |         | 0.0002* |
|  |  | Marginal 4 | Lateral 4                   |         |    |         | <.0001* |
|  |  | Marginal 2 | Lateral 3                   |         |    |         | 0.0066* |
|  |  | Lateral 3  | Central 3                   |         |    |         | 0.0054* |
|  |  | Marginal 4 | Central 4                   |         |    |         | 0.0002* |
|  |  | Marginal 2 | Lateral 4                   |         |    |         | <.0001* |
|  |  | Lateral 2  | Central 4                   |         |    |         | 0.0002* |
|  |  | Marginal 2 | Central 4                   |         |    |         | <.0001* |
|  |  | Marginal 4 | Lateral 3                   |         |    |         | 0.0012* |
|  |  | Lateral 3  | Central 4                   |         |    |         | 0.0008* |
|  |  | Central 4  | Central 2                   |         |    |         | <.0001* |
|  |  | Lateral 3  | Central 2                   |         |    |         | 0.0169* |
|  |  | Central 4  | Central 3                   |         |    |         | 0.0091* |
|  |  | Lateral 4  | Lateral 3                   |         |    |         | 0.0337* |
|  |  | Lateral 3  | Lateral 2                   |         |    |         | 0.0571  |
|  |  | Lateral 4  | Central 2                   |         |    |         | 0.0077* |
|  |  | Lateral 4  | Lateral 2                   |         |    |         | 0.0084* |
|  |  | Marginal 3 | Central 2                   |         |    |         | 0.0100* |
|  |  | Marginal 3 | Lateral 2                   |         |    |         | 0.0268* |
|  |  | Central 3  | Central 2                   |         |    |         | 0.0615  |
|  |  | Lateral 4  | Central 3                   |         |    |         | 0.2826  |
|  |  | Marginal 3 | Marginal 2                  |         |    |         | 0.2807  |
|  |  | Marginal 3 | Marginal 1                  |         |    |         | 0.2715  |
|  |  | Marginal 2 | Central 2                   |         |    |         | 0.3318  |
|  |  | Lateral 4  | Lateral 1                   |         |    |         | 0.4212  |
|  |  | Lateral 1  | Central 2                   |         |    |         | 0.3532  |
|  |  | Marginal 3 | Lateral 3                   |         |    |         | 0.6527  |
|  |  | Marginal 1 | Lateral 2                   |         |    |         | 0.5551  |
|  |  | Marginal 2 | Lateral 2                   |         |    |         | 0.6626  |
|  |  | Marginal 1 | Central 2                   |         |    |         | 0.6784  |
|  |  | Lateral 1  | Central 3                   |         |    |         | 0.8130  |
|  |  | Marginal 3 | Lateral 1                   |         |    |         | 0.8647  |
|  |  | Lateral 2  | Central 2                   |         |    |         | 0.9231  |
|  |  | Marginal 3 | Central 3                   |         |    |         | 0.9650  |
|  |  | Marginal 2 | Marginal 1                  |         |    |         | 0.8255  |
|  |  | Marginal 1 | Lateral 1                   |         |    |         | 0.7414  |
|  |  | Lateral 1  | Central 1                   |         |    |         | 0.4745  |
|  |  | Marginal 1 | Central 3                   |         |    |         | 0.6847  |
|  |  | Marginal 1 | Lateral 3                   |         |    |         | 0.7094  |
|  |  | Marginal 2 | Lateral 1                   |         |    |         | 0.5319  |
|  |  | Central 4  | Central 1                   |         |    |         | 0.7361  |
|  |  | Lateral 4  | Central 1                   | 51.5682 | 11 | <.0001* | 0.6226  |
|  |  | Lateral 2  | Lateral 1                   |         |    |         | 0.3039  |
|  |  | Marginal 3 | Lateral 4                   |         |    |         | 0.4691  |
|  |  | Marginal 1 | Central 1                   |         |    |         | 0.2319  |
|  |  | Lateral 3  | Lateral 1                   |         |    |         | 0.5996  |
|  |  | Marginal 2 | Lateral 3                   |         |    |         | 0.4621  |
|  |  | Lateral 3  | Central 3                   |         |    |         | 0.3861  |
|  |  | Marginal 2 | Central 3                   |         |    |         | 0.2538  |
|  |  | Marginal 4 | Central 1                   |         |    |         | 0.0668  |
|  |  | Lateral 4  | Central 4                   |         |    |         | 0.2876  |
|  |  | Marginal 4 | Lateral 1                   |         |    |         | 0.0252* |
|  |  | Lateral 2  | Central 1                   |         |    |         | 0.0495* |
|  |  | Marginal 2 | Central 1                   |         |    |         | 0.1477  |
|  |  | Marginal 3 | Central 1                   |         |    |         | 0.1470  |
|  |  | Marginal 1 | Lateral 4                   |         |    |         | 0.1119  |
|  |  | Marginal 4 | Central 2                   |         |    |         | 0.0288* |
|  |  | Marginal 4 | Marginal 1                  |         |    |         | 0.0127* |
|  |  | Central 2  | ittorina littorea Central 1 |         |    |         | 0.0446* |
|  |  | Lateral 2  | Central 3                   |         |    |         | 0.0861  |
|  |  | Lateral 1  | Central 4                   |         |    |         | 0.2119  |
|  |  | Marginal 4 | Lateral 2                   |         |    |         | 0.0115* |
|  |  | Marginal 2 | Lateral 4                   |         |    |         | 0.0591  |
|  |  | Central 3  | Central 1                   |         |    |         | 0.1056  |
|  |  | Marginal 4 | Marginal 2                  |         |    |         | 0.0083* |
|  |  | Marginal 1 | Central 4                   |         |    |         | 0.0274* |
|  |  | Marginal 4 | Marginal 3                  |         |    |         | 0.0011* |
|  |  | Marginal 4 | Central 3                   |         |    |         | 0.0032* |
|  |  | Marginal 3 | Central 4                   |         |    |         | 0.0072* |
|  |  | Marginal 4 | Lateral 4                   |         |    |         | 0.0008* |
|  |  | Marginal 2 | Central 4                   |         |    |         | 0.0019* |
|  |  | Marginal 4 | Central 4                   |         |    |         | 0.0002* |
|  |  | Lateral 2  | Central 4                   |         |    |         | <.0001* |

|  |  |                  |                  |          |    |         |         |
|--|--|------------------|------------------|----------|----|---------|---------|
|  |  | Lateral 3        | Central 1        |          |    |         | 0.0216* |
|  |  | Marginal 4       | Lateral 3        |          |    |         | 0.0008* |
|  |  | Lateral 3        | Central 4        |          |    |         | <.0001* |
|  |  | Lateral 3        | Lateral 2        |          |    |         | <.0001* |
|  |  | Lateral 3        | Central 2        |          |    |         | <.0001* |
|  |  | Lateral 3        | Central 1        |          |    |         | 0.0004* |
|  |  | Lateral 3        | Lateral 1        |          |    |         | 0.0002* |
|  |  | Central 4        | Central 2        |          |    |         | <.0001* |
|  |  | Central 4        | Central 1        |          |    |         | 0.0006* |
|  |  | Lateral 4        | Central 2        |          |    |         | <.0001* |
|  |  | Central 3        | Central 2        |          |    |         | 0.0002* |
|  |  | Lateral 4        | Lateral 2        |          |    |         | 0.0001* |
|  |  | Lateral 4        | Lateral 1        |          |    |         | 0.0006* |
|  |  | Lateral 4        | Central 1        |          |    |         | 0.0011* |
|  |  | Central 3        | Central 1        |          |    |         | 0.0022* |
|  |  | Marginal 3       | Marginal 1       |          |    |         | 0.0045* |
|  |  | Marginal 3       | Marginal 2       |          |    |         | 0.0063* |
|  |  | Marginal 3       | Lateral 2        |          |    |         | 0.0105* |
|  |  | Marginal 3       | Central 2        |          |    |         | 0.0148* |
|  |  | Central 4        | Central 3        |          |    |         | 0.0784  |
|  |  | Marginal 3       | Central 1        |          |    |         | 0.0233* |
|  |  | Marginal 3       | Lateral 1        |          |    |         | 0.0354* |
|  |  | Lateral 4        | Central 3        |          |    |         | 0.1768  |
|  |  | Lateral 4        | Lateral 3        |          |    |         | 0.3688  |
|  |  | Lateral 3        | Central 3        |          |    |         | 0.5565  |
|  |  | Marginal 1       | Central 1        |          |    |         | 0.4586  |
|  |  | Lateral 1        | Central 1        |          |    |         | 0.3580  |
|  |  | Marginal 1       | Lateral 2        |          |    |         | 0.5868  |
|  |  | Lateral 1        | Central 2        |          |    |         | 0.7250  |
|  |  | Central 2        | Central 1        |          |    |         | 0.8208  |
|  |  | Marginal 1       | Central 2        |          |    |         | 0.9077  |
|  |  | Lateral 2        | Central 1        |          |    |         | 0.8835  |
|  |  | Marginal 2       | Central 1        |          |    |         | 0.8896  |
|  |  | Marginal 2       | Central 2        |          |    |         | 0.7220  |
|  |  | Lateral 2        | Central 2        |          |    |         | 0.6796  |
|  |  | Marginal 1       | Lateral 1        |          |    |         | 0.6606  |
|  |  | Lateral 4        | Central 4        | 117.2615 | 11 | <.0001* | 0.7094  |
|  |  | Lateral 2        | Lateral 1        |          |    |         | 0.5181  |
|  |  | Marginal 2       | Lateral 2        |          |    |         | 0.6087  |
|  |  | Marginal 2       | Marginal 1       |          |    |         | 0.3956  |
|  |  | Marginal 3       | Central 3        |          |    |         | 0.3718  |
|  |  | Marginal 2       | Lateral 1        |          |    |         | 0.3025  |
|  |  | Marginal 3       | Lateral 4        |          |    |         | 0.0532  |
|  |  | Lateral 3        | Central 4        |          |    |         | 0.1469  |
|  |  | Marginal 3       | Lateral 3        |          |    |         | 0.1227  |
|  |  | Marginal 3       | Central 4        |          |    |         | 0.0261* |
|  |  | Marginal 4       | Central 1        |          |    |         | 0.0041* |
|  |  | Lateral 1        | Central 3        |          |    |         | 0.0018* |
|  |  | Marginal 4       | Lateral 1        |          |    |         | 0.0015* |
|  |  | Marginal 4       | Lateral 2        |          |    |         | 0.0008* |
|  |  | Lateral 2        | Central 3        |          |    |         | 0.0002* |
|  |  | Marginal 2       | Central 3        |          |    |         | 0.0002* |
|  |  | Marginal 4       | Central 2        |          |    |         | 0.0001* |
|  |  | Marginal 1       | Central 3        |          |    |         | <.0001* |
|  |  | Marginal 4       | Marginal 1       |          |    |         | <.0001* |
|  |  | Marginal 4       | Marginal 3       |          |    |         | <.0001* |
|  |  | Marginal 4       | Marginal 2       |          |    |         | <.0001* |
|  |  | Marginal 2       | Lateral 4        |          |    |         | <.0001* |
|  |  | Marginal 1       | Lateral 4        |          |    |         | <.0001* |
|  |  | Lateral 1        | Central 4        |          |    |         | 0.0002* |
|  |  | Marginal 4       | Lateral 4        |          |    |         | <.0001* |
|  |  | Marginal 4       | Central 3        |          |    |         | <.0001* |
|  |  | Lateral 2        | Central 4        |          |    |         | <.0001* |
|  |  | Marginal 2       | Central 4        |          |    |         | <.0001* |
|  |  | Marginal 1       | Central 4        |          |    |         | <.0001* |
|  |  | Marginal 4       | Central 4        |          |    |         | <.0001* |
|  |  | Marginal 2       | Lateral 3        |          |    |         | <.0001* |
|  |  | Marginal 1       | Lateral 3        |          |    |         | <.0001* |
|  |  | Marginal 4       | Lateral 3        |          |    |         | <.0001* |
|  |  | Lateral 3        | Inner Marginal 3 |          |    |         | 0.0104* |
|  |  | Lateral 3        | Inner Marginal 2 |          |    |         | 0.0465* |
|  |  | Lateral 2        | Inner Marginal 3 |          |    |         | 0.0140* |
|  |  | Outer Marginal 3 | Inner Marginal 3 |          |    |         | 0.0141* |
|  |  | Lateral 2        | Inner Marginal 2 |          |    |         | 0.1065  |
|  |  | Outer Marginal 1 | Inner Marginal 3 |          |    |         | 0.0275* |
|  |  | Outer Marginal 1 | Inner Marginal 2 |          |    |         | 0.0668  |
|  |  | Outer Marginal 2 | Inner Marginal 3 |          |    |         | 0.0497* |
|  |  | Outer Marginal 2 | Inner Marginal 2 |          |    |         | 0.1052  |
|  |  | Lateral 2        | Central 1        |          |    |         | 0.3471  |
|  |  | Central 3        | Central 1        |          |    |         | 0.3156  |
|  |  | Central 2        | Central 1        |          |    |         | 0.3496  |
|  |  | Lateral 3        | Central 1        | 21.6336  | 10 | 0.0171* | 0.7107  |
|  |  | Inner Marginal 1 | Central 3        |          |    |         | 0.5169  |
|  |  | Inner Marginal 1 | Central 2        |          |    |         | 0.5486  |
|  |  | Outer Marginal 3 | Inner Marginal 2 |          |    |         | 0.7473  |
|  |  | Outer Marginal 2 | Outer Marginal 1 |          |    |         | 0.7491  |
|  |  | Inner Marginal 1 | Central 1        |          |    |         | 0.8525  |
|  |  | Outer Marginal 3 | Outer Marginal 1 |          |    |         | 1.0000  |
|  |  | Central 3        | Central 2        |          |    |         | 0.8541  |
|  |  | Outer Marginal 3 | Outer Marginal 2 |          |    |         | 0.8320  |
|  |  | Lateral 3        | Lateral 2        |          |    |         | 0.8407  |
|  |  | Outer Marginal 2 | Central 1        |          |    |         | 0.5354  |
|  |  | Outer Marginal 2 | Inner Marginal 1 |          |    |         | 0.3725  |
|  |  | Lateral 2        | Inner Marginal 1 |          |    |         | 0.5530  |

|  |  |                  |                  |         |    |         |         |
|--|--|------------------|------------------|---------|----|---------|---------|
|  |  | Lateral 2        | Central 3        |         |    |         | 0.4805  |
|  |  | Outer Marginal 3 | Central 1        |         |    |         | 0.4869  |
|  |  | Outer Marginal 1 | Inner Marginal 1 |         |    |         | 0.2976  |
|  |  | Inner Marginal 2 | Inner Marginal 1 |         |    |         | 0.1386  |
|  |  | Inner Marginal 3 | Inner Marginal 2 |         |    |         | 0.1386  |
|  |  | Lateral 2        | Central 2        |         |    |         | 0.3579  |
|  |  | Outer Marginal 2 | Lateral 2        |         |    |         | 0.3574  |
|  |  | Outer Marginal 1 | Central 1        |         |    |         | 0.3156  |
|  |  | Outer Marginal 2 | Central 2        |         |    |         | 0.1779  |
|  |  | Inner Marginal 3 | Inner Marginal 1 |         |    |         | 0.0722  |
|  |  | Outer Marginal 2 | Central 3        |         |    |         | 0.1658  |
|  |  | Outer Marginal 3 | Inner Marginal 1 |         |    |         | 0.2712  |
|  |  | Outer Marginal 2 | Lateral 3        |         |    |         | 0.5064  |
|  |  | Inner Marginal 2 | Central 2        |         |    |         | 0.0814  |
|  |  | Inner Marginal 2 | Central 3        |         |    |         | 0.0668  |
|  |  | Inner Marginal 3 | Central 2        |         |    |         | 0.0358* |
|  |  | Outer Marginal 1 | Central 2        |         |    |         | 0.0552  |
|  |  | Outer Marginal 3 | Central 2        |         |    |         | 0.0982  |
|  |  | Outer Marginal 1 | Lateral 2        |         |    |         | 0.0925  |
|  |  | Outer Marginal 1 | Central 3        |         |    |         | 0.0453* |
|  |  | Inner Marginal 3 | Central 3        |         |    |         | 0.0275* |
|  |  | Outer Marginal 3 | Lateral 2        |         |    |         | 0.0961  |
|  |  | Outer Marginal 3 | Central 3        |         |    |         | 0.0735  |
|  |  | Lateral 3        | Inner Marginal 1 |         |    |         | 0.3727  |
|  |  | Lateral 3        | Central 3        |         |    |         | 0.2606  |
|  |  | Inner Marginal 2 | Central 1        |         |    |         | 0.0442* |
|  |  | Inner Marginal 3 | Central 1        |         |    |         | 0.0157* |
|  |  | Lateral 3        | Central 2        |         |    |         | 0.1727  |
|  |  | Outer Marginal 1 | Lateral 3        |         |    |         | 0.1402  |
|  |  | Outer Marginal 3 | Lateral 3        |         |    |         | 0.1042  |
|  |  | Outer Marginal 3 | Lateral 3        |         |    |         | 0.0128* |
|  |  | Outer Marginal 3 | Outer Marginal 2 |         |    |         | 0.0105* |
|  |  | Outer Marginal 1 | Lateral 3        |         |    |         | 0.1263  |
|  |  | Outer Marginal 3 | Lateral 2        |         |    |         | 0.0952  |
|  |  | Lateral 2        | Inner Marginal 2 |         |    |         | 0.1172  |
|  |  | Outer Marginal 3 | Inner Marginal 2 |         |    |         | 0.0440* |
|  |  | Outer Marginal 1 | Inner Marginal 2 |         |    |         | 0.1175  |
|  |  | Inner Marginal 1 | Central 2        |         |    |         | 0.2699  |
|  |  | Outer Marginal 3 | Central 2        |         |    |         | 0.3071  |
|  |  | Outer Marginal 3 | Inner Marginal 3 |         |    |         | 0.2888  |
|  |  | Inner Marginal 3 | Inner Marginal 2 |         |    |         | 0.3617  |
|  |  | Central 3        | Central 2        |         |    |         | 0.3257  |
|  |  | Outer Marginal 3 | Outer Marginal 1 |         |    |         | 0.4377  |
|  |  | Outer Marginal 1 | Inner Marginal 3 |         |    |         | 0.5886  |
|  |  | Inner Marginal 1 | Central 3        |         |    |         | 0.5169  |
|  |  | Inner Marginal 1 | Central 1        |         |    |         | 0.7172  |
|  |  | Central 3        | Central 1        |         |    |         | 0.7074  |
|  |  | Outer Marginal 3 | Central 1        |         |    |         | 0.7665  |
|  |  | Lateral 2        | Inner Marginal 3 |         |    |         | 0.8949  |
|  |  | Outer Marginal 1 | Lateral 2        |         |    |         | 0.9676  |
|  |  | Outer Marginal 3 | Central 3        |         |    |         | 0.9567  |
|  |  | Outer Marginal 1 | Central 2        |         |    |         | 0.9674  |
|  |  | Inner Marginal 3 | Central 2        |         |    |         | 0.7225  |
|  |  | Outer Marginal 3 | Inner Marginal 1 |         |    |         | 0.6722  |
|  |  | Lateral 3        | Inner Marginal 2 |         |    |         | 0.7850  |
|  |  | Inner Marginal 3 | Inner Marginal 1 |         |    |         | 0.3725  |
|  |  | Central 2        | Central 1        |         |    |         | 0.5519  |
|  |  | Outer Marginal 2 | Lateral 3        | 24.8909 | 10 | 0.0056* | 0.7044  |
|  |  | Outer Marginal 1 | Central 3        |         |    |         | 0.3763  |
|  |  | Outer Marginal 2 | Inner Marginal 2 |         |    |         | 0.4855  |
|  |  | Inner Marginal 3 | Central 3        |         |    |         | 0.1658  |
|  |  | Outer Marginal 1 | Inner Marginal 1 |         |    |         | 0.2270  |
|  |  | Outer Marginal 1 | Central 1        |         |    |         | 0.2700  |
|  |  | Lateral 2        | Central 2        |         |    |         | 0.4039  |
|  |  | Inner Marginal 3 | Central 1        |         |    |         | 0.2239  |
|  |  | Lateral 2        | Central 1        |         |    |         | 0.3539  |
|  |  | Outer Marginal 2 | Inner Marginal 3 |         |    |         | 0.2365  |
|  |  | Lateral 3        | Inner Marginal 3 |         |    |         | 0.5060  |
|  |  | Inner Marginal 2 | Central 2        |         |    |         | 0.1053  |
|  |  | Lateral 2        | Inner Marginal 1 |         |    |         | 0.3317  |
|  |  | Inner Marginal 2 | Inner Marginal 1 |         |    |         | 0.0960  |
|  |  | Outer Marginal 2 | Outer Marginal 1 |         |    |         | 0.0473* |
|  |  | Outer Marginal 2 | Inner Marginal 1 |         |    |         | 0.0826  |
|  |  | Outer Marginal 2 | Central 2        |         |    |         | 0.0447* |
|  |  | Inner Marginal 2 | Central 1        |         |    |         | 0.0224* |
|  |  | Inner Marginal 2 | Central 3        |         |    |         | 0.0113* |
|  |  | Outer Marginal 2 | Lateral 2        |         |    |         | 0.0445* |
|  |  | Lateral 3        | Lateral 2        |         |    |         | 0.1046  |
|  |  | Lateral 2        | Central 3        |         |    |         | 0.0422* |
|  |  | Outer Marginal 2 | Central 3        |         |    |         | 0.0071* |
|  |  | Outer Marginal 2 | Central 1        |         |    |         | 0.0075* |
|  |  | Lateral 3        | Central 2        |         |    |         | 0.0795  |
|  |  | Lateral 3        | Inner Marginal 1 |         |    |         | 0.1143  |
|  |  | Lateral 3        | Central 1        |         |    |         | 0.0180* |
|  |  | Lateral 3        | Central 3        |         |    |         | 0.0151* |
|  |  | Inner Marginal 2 | Central 1        |         |    |         | 0.0765  |
|  |  | Inner Marginal 2 | Central 2        |         |    |         | 0.1498  |
|  |  | Inner Marginal 2 | Central 3        |         |    |         | 0.1489  |
|  |  | Inner Marginal 2 | Inner Marginal 1 |         |    |         | 0.1386  |
|  |  | Inner Marginal 3 | Central 1        | 9.2661  | 10 | 0.5071  | 0.1386  |
|  |  | Inner Marginal 3 | Central 3        |         |    |         | 0.2453  |
|  |  | Inner Marginal 3 | Inner Marginal 1 |         |    |         | 0.2207  |
|  |  | Lateral 2        | Central 2        |         |    |         | 0.4529  |
|  |  | Inner Marginal 1 | Central 2        |         |    |         | 0.4745  |



|   |  |                  |                  |         |    |         |         |
|---|--|------------------|------------------|---------|----|---------|---------|
|   |  | Inner Marginal 3 | Central 2        |         |    |         | 0.4811  |
|   |  | Lateral 2        | Central 1        |         |    |         | 0.6508  |
|   |  | Outer Marginal 3 | Outer Marginal 2 |         |    |         | 0.5403  |
|   |  | Lateral 2        | Central 3        |         |    |         | 0.6959  |
|   |  | Central 3        | Central 2        |         |    |         | 0.8057  |
|   |  | Lateral 2        | Inner Marginal 1 |         |    |         | 0.8451  |
|   |  | Lateral 2        | Inner Marginal 3 |         |    |         | 0.8465  |
|   |  | Central 3        | Central 1        |         |    |         | 1.0000  |
|   |  | Inner Marginal 1 | Central 3        |         |    |         | 1.0000  |
|   |  | Lateral 3        | Central 1        |         |    |         | 1.0000  |
|   |  | Lateral 3        | Central 3        |         |    |         | 1.0000  |
|   |  | Lateral 3        | Inner Marginal 1 |         |    |         | 1.0000  |
|   |  | Lateral 3        | Inner Marginal 3 |         |    |         | 1.0000  |
|   |  | Outer Marginal 1 | Lateral 3        |         |    |         | 1.0000  |
|   |  | Outer Marginal 2 | Outer Marginal 1 |         |    |         | 1.0000  |
|   |  | Outer Marginal 3 | Lateral 3        |         |    |         | 1.0000  |
|   |  | Lateral 3        | Central 2        |         |    |         | 0.8642  |
|   |  | Inner Marginal 1 | Central 1        |         |    |         | 0.7609  |
|   |  | Outer Marginal 2 | Lateral 3        |         |    |         | 0.8432  |
|   |  | Outer Marginal 1 | Central 2        |         |    |         | 0.7168  |
|   |  | Outer Marginal 1 | Central 3        |         |    |         | 0.5403  |
|   |  | Outer Marginal 1 | Inner Marginal 1 |         |    |         | 0.4795  |
|   |  | Outer Marginal 1 | Inner Marginal 3 |         |    |         | 0.5403  |
|   |  | Outer Marginal 2 | Central 3        |         |    |         | 0.5403  |
|   |  | Outer Marginal 2 | Inner Marginal 1 |         |    |         | 0.4795  |
|   |  | Outer Marginal 2 | Inner Marginal 3 |         |    |         | 0.5403  |
|   |  | Outer Marginal 3 | Outer Marginal 1 |         |    |         | 0.5403  |
|   |  | Lateral 2        | Inner Marginal 2 |         |    |         | 0.6528  |
|   |  | Central 2        | Central 1        |         |    |         | 0.5784  |
|   |  | Outer Marginal 1 | Lateral 2        |         |    |         | 0.5582  |
|   |  | Outer Marginal 1 | Central 1        |         |    |         | 0.3458  |
|   |  | Outer Marginal 1 | Inner Marginal 2 |         |    |         | 0.3711  |
|   |  | Outer Marginal 2 | Central 1        |         |    |         | 0.3458  |
|   |  | Outer Marginal 2 | Inner Marginal 2 |         |    |         | 0.3711  |
|   |  | Outer Marginal 3 | Central 2        |         |    |         | 0.3404  |
|   |  | Outer Marginal 3 | Central 3        |         |    |         | 0.2453  |
|   |  | Outer Marginal 3 | Inner Marginal 1 |         |    |         | 0.2207  |
|   |  | Outer Marginal 3 | Inner Marginal 3 |         |    |         | 0.2453  |
|   |  | Inner Marginal 3 | Inner Marginal 2 |         |    |         | 0.2361  |
|   |  | Outer Marginal 3 | Lateral 2        |         |    |         | 0.3329  |
|   |  | Outer Marginal 2 | Lateral 2        |         |    |         | 0.3729  |
|   |  | Outer Marginal 2 | Central 2        |         |    |         | 0.2765  |
|   |  | Outer Marginal 3 | Central 1        |         |    |         | 0.1386  |
|   |  | Outer Marginal 3 | Inner Marginal 2 |         |    |         | 0.1489  |
|   |  | Lateral 3        | Inner Marginal 2 |         |    |         | 0.3041  |
|   |  | Lateral 3        | Lateral 2        |         |    |         | 0.2676  |
|   |  | Lateral 3        | Central 3        |         |    |         | 0.0202* |
| P |  | Lateral 3        | Central 1        |         |    |         | 0.0917  |
|   |  | Lateral 3        | Inner Marginal 1 |         |    |         | 0.2104  |
|   |  | Lateral 3        | Inner Marginal 3 |         |    |         | 0.2777  |
|   |  | Lateral 3        | Lateral 2        |         |    |         | 0.6558  |
|   |  | Lateral 2        | Central 1        |         |    |         | 0.2030  |
|   |  | Lateral 2        | Central 3        |         |    |         | 0.5613  |
|   |  | Inner Marginal 1 | Central 3        |         |    |         | 0.4740  |
|   |  | Outer Marginal 1 | Central 3        |         |    |         | 0.4750  |
|   |  | Lateral 2        | Inner Marginal 1 |         |    |         | 0.3458  |
|   |  | Inner Marginal 3 | Central 3        |         |    |         | 0.8379  |
|   |  | Inner Marginal 3 | Inner Marginal 1 |         |    |         | 1.0000  |
|   |  | Lateral 2        | Inner Marginal 3 |         |    |         | 1.0000  |
|   |  | Outer Marginal 1 | Inner Marginal 1 |         |    |         | 1.0000  |
|   |  | Outer Marginal 1 | Inner Marginal 3 |         |    |         | 1.0000  |
|   |  | Inner Marginal 3 | Central 1        | 17.2038 |    |         | 0.6961  |
|   |  | Inner Marginal 1 | Central 1        |         | 7  |         | 0.5133  |
|   |  | Outer Marginal 1 | Lateral 2        |         |    | 0.0161* | 0.3711  |
|   |  | Outer Marginal 1 | Central 1        |         |    |         | 0.3621  |
|   |  | Outer Marginal 3 | Inner Marginal 3 |         |    |         | 0.2354  |
|   |  | Outer Marginal 3 | Central 3        |         |    |         | 0.2296  |
|   |  | Central 3        | Central 1        |         |    |         | 0.1743  |
|   |  | Outer Marginal 3 | Lateral 2        |         |    |         | 0.2673  |
|   |  | Outer Marginal 3 | Inner Marginal 1 |         |    |         | 0.1073  |
|   |  | Outer Marginal 3 | Outer Marginal 1 |         |    |         | 0.1078  |
|   |  | Outer Marginal 3 | Central 1        |         |    |         | 0.0167* |
|   |  | Outer Marginal 1 | Lateral 3        |         |    |         | 0.2104  |
|   |  | Outer Marginal 3 | Lateral 3        |         |    |         | 0.0028* |
| S |  | Outer Marginal 1 | Lateral 3        |         |    |         | 0.0393* |
|   |  | Lateral 2        | Central 3        |         |    |         | 0.0306* |
|   |  | Inner Marginal 1 | Central 3        |         |    |         | 0.0017* |
|   |  | Outer Marginal 1 | Central 3        |         |    |         | 0.0020* |
|   |  | Lateral 3        | Central 3        |         |    |         | 0.2001  |
|   |  | Lateral 1        | Central 3        |         |    |         | 0.0024* |
|   |  | Lateral 1        | Inner Marginal 2 |         |    |         | 0.0521  |
|   |  | Lateral 2        | Inner Marginal 2 |         |    |         | 0.1647  |
|   |  | Outer Marginal 1 | Inner Marginal 2 |         |    |         | 0.0722  |
|   |  | Outer Marginal 1 | Lateral 2        |         |    |         | 0.2421  |
|   |  | Outer Marginal 2 | Central 3        |         |    |         | 0.1776  |
|   |  | Lateral 1        | Inner Marginal 3 |         |    |         | 0.0646  |
|   |  | Inner Marginal 3 | Central 3        | 31.8352 |    |         | 0.0929  |
|   |  | Outer Marginal 2 | Lateral 3        |         | 11 |         | 0.5251  |
|   |  | Lateral 3        | Inner Marginal 2 |         |    |         | 0.5365  |
|   |  | Inner Marginal 3 | Inner Marginal 2 |         |    |         | 0.3210  |
|   |  | Outer Marginal 1 | Inner Marginal 3 |         |    |         | 0.3160  |
|   |  | Outer Marginal 2 | Inner Marginal 2 |         |    |         | 0.4925  |
|   |  | Lateral 1        | Inner Marginal 1 |         |    |         | 0.3738  |
|   |  | Lateral 1        | Central 1        |         |    |         | 0.4518  |



|  |              |                  |                  |         |    |         |         |
|--|--------------|------------------|------------------|---------|----|---------|---------|
|  |              | Lateral 2        | Central 2        |         |    |         | 0.6374  |
|  |              | Outer Marginal 2 | Lateral 2        |         |    |         | 0.6374  |
|  |              | Outer Marginal 2 | Central 3        |         |    |         | 0.5403  |
|  |              | Lateral 2        | Central 3        |         |    |         | 0.5536  |
|  |              | Lateral 3        | Lateral 2        |         |    |         | 0.4678  |
|  |              | Lateral 3        | Central 2        |         |    |         | 0.2393  |
|  |              | Lateral 3        | Central 3        |         |    |         | 0.1460  |
|  |              | Lateral 3        | Lateral 1        |         |    |         | 0.0004* |
|  |              | Lateral 3        | Inner Marginal 1 |         |    |         | 0.0006* |
|  |              | Lateral 3        | Central 1        |         |    |         | 0.0018* |
|  |              | Lateral 3        | Inner Marginal 3 |         |    |         | 0.0107* |
|  |              | Lateral 2        | Lateral 1        |         |    |         | 0.0005* |
|  |              | Lateral 2        | Inner Marginal 1 |         |    |         | 0.0013* |
|  |              | Lateral 2        | Central 1        |         |    |         | 0.0027* |
|  |              | Lateral 2        | Inner Marginal 3 |         |    |         | 0.0096* |
|  |              | Inner Marginal 2 | Central 1        |         |    |         | 0.0003* |
|  |              | Outer Marginal 2 | Inner Marginal 3 |         |    |         | 0.0005* |
|  |              | Outer Marginal 2 | Lateral 1        |         |    |         | 0.0004* |
|  |              | Outer Marginal 2 | Inner Marginal 1 |         |    |         | 0.0004* |
|  |              | Central 2        | Central 1        |         |    |         | 0.0002* |
|  |              | Inner Marginal 2 | Inner Marginal 1 |         |    |         | 0.0005* |
|  |              | Outer Marginal 2 | Outer Marginal 1 |         |    |         | 0.0011* |
|  |              | Outer Marginal 2 | Central 1        |         |    |         | 0.0017* |
|  |              | Outer Marginal 3 | Lateral 1        |         |    |         | 0.0008* |
|  |              | Outer Marginal 1 | Lateral 1        |         |    |         | 0.0017* |
|  |              | Central 3        | Central 1        |         |    |         | 0.0150* |
|  |              | Outer Marginal 3 | Inner Marginal 1 |         |    |         | 0.0356* |
|  |              | Inner Marginal 2 | Central 3        |         |    |         | 0.1293  |
|  |              | Outer Marginal 1 | Inner Marginal 1 |         |    |         | 0.1207  |
|  |              | Outer Marginal 3 | Inner Marginal 3 |         |    |         | 0.2603  |
|  |              | Outer Marginal 3 | Outer Marginal 1 |         |    |         | 0.3369  |
|  |              | Inner Marginal 3 | Inner Marginal 1 |         |    |         | 0.3139  |
|  |              | Outer Marginal 3 | Central 1        |         |    |         | 0.6231  |
|  |              | Inner Marginal 3 | Central 1        |         |    |         | 0.7427  |
|  |              | Lateral 1        | Inner Marginal 1 |         |    |         | 0.8583  |
|  |              | Lateral 3        | Lateral 2        |         |    |         | 0.9104  |
|  |              | Outer Marginal 2 | Lateral 2        |         |    |         | 0.8308  |
|  |              | Lateral 2        | Central 3        |         |    |         | 0.7682  |
|  |              | Outer Marginal 2 | Central 3        |         |    |         | 0.6458  |
|  |              | Inner Marginal 2 | Central 2        |         |    |         | 0.6084  |
|  |              | Outer Marginal 1 | Central 1        | 74.8328 | 11 | <.0001* | 0.4550  |
|  |              | Outer Marginal 1 | Inner Marginal 3 |         |    |         | 0.3763  |
|  |              | Lateral 3        | Central 3        |         |    |         | 0.6942  |
|  |              | Outer Marginal 2 | Lateral 3        |         |    |         | 0.5036  |
|  |              | Central 3        | Central 2        |         |    |         | 0.0821  |
|  |              | Inner Marginal 3 | Central 3        |         |    |         | 0.0332* |
|  |              | Outer Marginal 3 | Central 3        |         |    |         | 0.0490* |
|  |              | Inner Marginal 1 | Central 1        |         |    |         | 0.0500* |
|  |              | Lateral 1        | Inner Marginal 3 |         |    |         | 0.0047* |
|  |              | Outer Marginal 1 | Central 3        |         |    |         | 0.0107* |
|  |              | Inner Marginal 1 | Central 3        |         |    |         | 0.0079* |
|  |              | Lateral 1        | Central 3        |         |    |         | 0.0023* |
|  |              | Inner Marginal 3 | Central 2        |         |    |         | 0.0043* |
|  |              | Lateral 2        | Inner Marginal 2 |         |    |         | 0.0369* |
|  |              | Lateral 1        | Central 1        |         |    |         | 0.0016* |
|  |              | Inner Marginal 3 | Inner Marginal 2 |         |    |         | 0.0031* |
|  |              | Lateral 1        | Central 2        |         |    |         | 0.0009* |
|  |              | Outer Marginal 3 | Lateral 2        |         |    |         | 0.0216* |
|  |              | Outer Marginal 2 | Inner Marginal 2 |         |    |         | 0.0047* |
|  |              | Outer Marginal 1 | Central 2        |         |    |         | 0.0006* |
|  |              | Outer Marginal 2 | Central 2        |         |    |         | 0.0024* |
|  |              | Inner Marginal 1 | Central 2        |         |    |         | 0.0004* |
|  |              | Outer Marginal 3 | Outer Marginal 2 |         |    |         | 0.0017* |
|  |              | Outer Marginal 3 | Inner Marginal 2 |         |    |         | 0.0013* |
|  |              | Outer Marginal 3 | Central 2        |         |    |         | 0.0006* |
|  |              | Lateral 2        | Central 2        |         |    |         | 0.0093* |
|  |              | Lateral 1        | Inner Marginal 2 |         |    |         | 0.0005* |
|  |              | Outer Marginal 1 | Inner Marginal 2 |         |    |         | 0.0004* |
|  |              | Outer Marginal 1 | Lateral 2        |         |    |         | 0.0024* |
|  |              | Lateral 3        | Inner Marginal 2 |         |    |         | 0.0084* |
|  |              | Outer Marginal 3 | Lateral 3        |         |    |         | 0.0060* |
|  |              | Lateral 3        | Central 2        |         |    |         | 0.0022* |
|  |              | Outer Marginal 1 | Lateral 3        |         |    |         | 0.0013* |
|  | Ca           | Lateral 3        | Lateral 2        | 3.4404  | 2  | 0.1790  | 0.1161  |
|  |              | Lateral 2        | Central 2        |         |    |         | 0.6973  |
|  |              | Lateral 3        | Central 2        |         |    |         | 0.5403  |
|  |              | Lateral 3        | Inner Marginal 3 |         |    |         | <.0001* |
|  |              | Lateral 3        | Lateral 1        |         |    |         | <.0001* |
|  |              | Lateral 3        | Lateral 2        |         |    |         | 0.0002* |
|  |              | Lateral 3        | Inner Marginal 1 |         |    |         | 0.0007* |
|  |              | Lateral 3        | Inner Marginal 2 |         |    |         | 0.0003* |
|  |              | Lateral 3        | Central 1        |         |    |         | 0.0008* |
|  |              | Lateral 2        | Lateral 1        |         |    |         | 0.0002* |
|  |              | Lateral 2        | Inner Marginal 3 |         |    |         | 0.0002* |
|  |              | Outer Marginal 2 | Lateral 1        |         |    |         | 0.0005* |
|  |              | Outer Marginal 3 | Lateral 1        | 88.5554 | 11 | <.0001* | 0.0009* |
|  |              | Lateral 2        | Inner Marginal 1 |         |    |         | 0.0341* |
|  |              | Central 2        | Central 1        |         |    |         | 0.0051* |
|  |              | Outer Marginal 2 | Inner Marginal 3 |         |    |         | 0.0131* |
|  |              | Outer Marginal 1 | Lateral 1        |         |    |         | 0.0017* |
|  |              | Central 3        | Central 1        |         |    |         | 0.0077* |
|  |              | Outer Marginal 3 | Inner Marginal 3 |         |    |         | 0.0078* |
|  |              | Outer Marginal 1 | Inner Marginal 3 |         |    |         | 0.0237* |
|  |              | Inner Marginal 2 | Inner Marginal 1 |         |    |         | 0.1065  |
|  | All elements |                  |                  |         |    |         |         |

|                 |   |                  |                  |         |    |         |         |
|-----------------|---|------------------|------------------|---------|----|---------|---------|
|                 |   | Outer Marginal 2 | Inner Marginal 1 |         |    |         | 0.1653  |
|                 |   | Outer Marginal 3 | Inner Marginal 1 |         |    |         | 0.1883  |
|                 |   | Outer Marginal 1 | Inner Marginal 1 |         |    |         | 0.1995  |
|                 |   | Lateral 2        | Inner Marginal 2 |         |    |         | 0.4975  |
|                 |   | Lateral 2        | Central 1        |         |    |         | 0.5032  |
|                 |   | Outer Marginal 3 | Outer Marginal 2 |         |    |         | 0.4436  |
|                 |   | Central 3        | Central 2        |         |    |         | 0.6160  |
|                 |   | Inner Marginal 2 | Central 1        |         |    |         | 0.8709  |
|                 |   | Inner Marginal 3 | Inner Marginal 1 |         |    |         | 0.8851  |
|                 |   | Outer Marginal 3 | Outer Marginal 1 |         |    |         | 0.9716  |
|                 |   | Lateral 3        | Central 2        |         |    |         | 0.8574  |
|                 |   | Lateral 1        | Inner Marginal 1 |         |    |         | 0.6789  |
|                 |   | Outer Marginal 2 | Outer Marginal 1 |         |    |         | 0.5521  |
|                 |   | Outer Marginal 3 | Central 1        |         |    |         | 0.4703  |
|                 |   | Lateral 3        | Central 3        |         |    |         | 0.7131  |
|                 |   | Lateral 1        | Inner Marginal 3 |         |    |         | 0.2714  |
|                 |   | Outer Marginal 1 | Central 1        |         |    |         | 0.3023  |
|                 |   | Outer Marginal 3 | Inner Marginal 2 |         |    |         | 0.3413  |
|                 |   | Outer Marginal 1 | Inner Marginal 2 |         |    |         | 0.3217  |
|                 |   | Inner Marginal 1 | Central 1        |         |    |         | 0.0945  |
|                 |   | Outer Marginal 2 | Central 1        |         |    |         | 0.0857  |
|                 |   | Outer Marginal 3 | Lateral 2        |         |    |         | 0.1662  |
|                 |   | Inner Marginal 1 | Central 3        |         |    |         | 0.0081* |
|                 |   | Outer Marginal 1 | Central 3        |         |    |         | 0.0081* |
|                 |   | Outer Marginal 1 | Lateral 2        |         |    |         | 0.1040  |
|                 |   | Lateral 1        | Central 3        |         |    |         | 0.0024* |
|                 |   | Inner Marginal 2 | Central 3        |         |    |         | 0.0184* |
|                 |   | Inner Marginal 3 | Central 1        |         |    |         | 0.0061* |
|                 |   | Outer Marginal 3 | Central 3        |         |    |         | 0.0055* |
|                 |   | Inner Marginal 3 | Central 3        |         |    |         | 0.0014* |
|                 |   | Outer Marginal 1 | Central 2        |         |    |         | 0.0050* |
|                 |   | Inner Marginal 1 | Central 2        |         |    |         | 0.0025* |
|                 |   | Outer Marginal 2 | Inner Marginal 2 |         |    |         | 0.0098* |
|                 |   | Outer Marginal 3 | Central 2        |         |    |         | 0.0024* |
|                 |   | Inner Marginal 2 | Central 2        |         |    |         | 0.0050* |
|                 |   | Lateral 1        | Central 1        |         |    |         | 0.0009* |
|                 |   | Lateral 1        | Central 2        |         |    |         | 0.0009* |
|                 |   | Inner Marginal 3 | Central 2        |         |    |         | 0.0008* |
|                 |   | Lateral 2        | Central 2        |         |    |         | 0.0131* |
|                 |   | Inner Marginal 3 | Inner Marginal 2 |         |    |         | 0.0008* |
|                 |   | Lateral 2        | Central 3        |         |    |         | 0.0113* |
|                 |   | Outer Marginal 2 | Central 3        |         |    |         | 0.0004* |
|                 |   | Lateral 1        | Inner Marginal 2 |         |    |         | 0.0005* |
|                 |   | Outer Marginal 2 | Central 2        |         |    |         | 0.0003* |
|                 |   | Outer Marginal 2 | Lateral 2        |         |    |         | 0.0018* |
|                 |   | Outer Marginal 1 | Lateral 3        |         |    |         | 0.0002* |
|                 |   | Outer Marginal 3 | Lateral 3        |         |    |         | <.0001* |
|                 |   | Outer Marginal 2 | Lateral 3        |         |    |         | <.0001* |
|                 |   | Lateral 3        | Inner Marginal 3 |         |    |         | 0.0196* |
|                 |   | Lateral 3        | Central 1        |         |    |         | 0.0653  |
|                 |   | Lateral 2        | Inner Marginal 3 |         |    |         | 0.0293* |
|                 |   | Lateral 3        | Lateral 2        |         |    |         | 0.3315  |
|                 |   | Lateral 2        | Central 1        |         |    |         | 0.1721  |
|                 |   | Central 3        | Central 1        |         |    |         | 0.0604  |
|                 |   | Outer Marginal 1 | Inner Marginal 3 |         |    |         | 0.0635  |
|                 |   | Inner Marginal 2 | Central 1        |         |    |         | 0.1720  |
|                 |   | Central 2        | Central 1        |         |    |         | 0.3990  |
|                 |   | Outer Marginal 3 | Inner Marginal 3 |         |    |         | 0.4142  |
|                 |   | Inner Marginal 2 | Central 3        |         |    |         | 1.0000  |
|                 |   | Central 3        | Central 2        |         |    |         | 0.8948  |
|                 |   | Inner Marginal 2 | Central 2        |         |    |         | 0.7374  |
|                 |   | Inner Marginal 3 | Central 2        |         |    |         | 0.2453  |
|                 |   | Outer Marginal 1 | Central 1        |         |    |         | 0.4680  |
|                 |   | Outer Marginal 3 | Central 2        |         |    |         | 0.2453  |
|                 |   | Outer Marginal 1 | Central 2        |         |    |         | 0.3990  |
|                 |   | Lateral 3        | Inner Marginal 2 |         |    |         | 0.6477  |
|                 |   | Outer Marginal 1 | Inner Marginal 2 | 20.1536 | 8  | 0.0098* | 0.1720  |
|                 |   | Lateral 2        | Central 2        |         |    |         | 0.4392  |
|                 |   | Lateral 2        | Inner Marginal 2 |         |    |         | 0.3193  |
|                 |   | Inner Marginal 3 | Central 1        |         |    |         | 0.0635  |
|                 |   | Inner Marginal 3 | Inner Marginal 2 |         |    |         | 0.0668  |
|                 |   | Outer Marginal 3 | Central 1        |         |    |         | 0.0635  |
|                 |   | Outer Marginal 3 | Inner Marginal 2 |         |    |         | 0.0668  |
|                 |   | Outer Marginal 3 | Outer Marginal 1 |         |    |         | 0.0635  |
|                 |   | Lateral 2        | Central 3        |         |    |         | 0.1875  |
|                 |   | Lateral 3        | Central 2        |         |    |         | 0.6364  |
|                 |   | Outer Marginal 1 | Central 3        |         |    |         | 0.0604  |
|                 |   | Lateral 3        | Central 3        |         |    |         | 0.4063  |
|                 |   | Inner Marginal 3 | Central 3        |         |    |         | 0.0495* |
|                 |   | Outer Marginal 3 | Central 3        |         |    |         | 0.0495* |
|                 |   | Outer Marginal 1 | Lateral 2        |         |    |         | 0.1303  |
|                 |   | Outer Marginal 3 | Lateral 2        |         |    |         | 0.0293* |
|                 |   | Outer Marginal 1 | Lateral 3        |         |    |         | 0.0484* |
|                 |   | Outer Marginal 3 | Lateral 3        |         |    |         | 0.0196* |
|                 |   | Outer Marginal 3 | Inner Marginal 2 |         |    |         | 1.0000  |
|                 | F | Outer Marginal 3 | Outer Marginal 1 | 2.2500  | 2  | 0.3247  | 1.0000  |
|                 |   | Outer Marginal 1 | Inner Marginal 2 |         |    |         | 0.5403  |
|                 |   | Lateral II 2     | Lateral I 4      |         |    |         | 0.0033* |
|                 |   | Outer Marginal 3 | Outer Marginal 1 |         |    |         | 0.0026* |
|                 |   | Outer Marginal 1 | Lateral I 4      |         |    |         | 0.0033* |
|                 |   | Outer Marginal 3 | Lateral I 4      | 60.4272 | 15 | <.0001* | 0.0033* |
|                 |   | Outer Marginal 3 | Lateral II 4     |         |    |         | 0.0034* |
|                 |   | Outer Marginal 3 | Lateral I 3      |         |    |         | 0.0049* |
|                 |   | Lateral II 2     | Inner Marginal 4 |         |    |         | 0.0137* |
| Vittina turrata |   |                  |                  |         |    |         |         |

|  |  |                  |                  |  |  |         |
|--|--|------------------|------------------|--|--|---------|
|  |  | Lateral II 2     | Lateral I 1      |  |  | 0.0141* |
|  |  | Lateral II 3     | Lateral I 3      |  |  | 0.0058* |
|  |  | Outer Marginal 3 | Lateral I 2      |  |  | 0.0058* |
|  |  | Lateral II 4     | Lateral I 4      |  |  | 0.0061* |
|  |  | Outer Marginal 1 | Lateral II 4     |  |  | 0.0119* |
|  |  | Lateral II 3     | Lateral I 4      |  |  | 0.0078* |
|  |  | Lateral II 3     | Lateral I 2      |  |  | 0.0122* |
|  |  | Lateral I 3      | Inner Marginal 4 |  |  | 0.0210* |
|  |  | Lateral I 3      | Lateral I 1      |  |  | 0.0222* |
|  |  | Outer Marginal 1 | Inner Marginal 4 |  |  | 0.0210* |
|  |  | Outer Marginal 1 | Lateral I 1      |  |  | 0.0222* |
|  |  | Outer Marginal 3 | Inner Marginal 4 |  |  | 0.0210* |
|  |  | Outer Marginal 3 | Lateral I 1      |  |  | 0.0222* |
|  |  | Lateral II 2     | Lateral II 1     |  |  | 0.1059  |
|  |  | Lateral II 2     | Inner Marginal 1 |  |  | 0.2049  |
|  |  | Lateral II 4     | Inner Marginal 4 |  |  | 0.0250* |
|  |  | Lateral II 4     | Lateral I 1      |  |  | 0.0269* |
|  |  | Outer Marginal 1 | Lateral II 1     |  |  | 0.0570  |
|  |  | Outer Marginal 3 | Lateral II 1     |  |  | 0.0570  |
|  |  | Lateral II 2     | Lateral I 2      |  |  | 0.0982  |
|  |  | Lateral II 2     | Lateral I 3      |  |  | 0.1073  |
|  |  | Lateral I 2      | Inner Marginal 4 |  |  | 0.0325* |
|  |  | Lateral I 2      | Lateral I 1      |  |  | 0.0358* |
|  |  | Lateral II 3     | Inner Marginal 4 |  |  | 0.0325* |
|  |  | Lateral II 3     | Lateral I 1      |  |  | 0.0358* |
|  |  | Lateral II 3     | Lateral II 2     |  |  | 0.1583  |
|  |  | Lateral I 3      | Inner Marginal 1 |  |  | 0.1904  |
|  |  | Outer Marginal 1 | Inner Marginal 1 |  |  | 0.1904  |
|  |  | Outer Marginal 2 | Lateral I 3      |  |  | 0.1904  |
|  |  | Outer Marginal 2 | Outer Marginal 1 |  |  | 0.1904  |
|  |  | Outer Marginal 3 | Inner Marginal 1 |  |  | 0.1904  |
|  |  | Lateral II 4     | Lateral II 1     |  |  | 0.0916  |
|  |  | Lateral II 3     | Lateral II 1     |  |  | 0.0814  |
|  |  | Lateral II 4     | Inner Marginal 1 |  |  | 0.2072  |
|  |  | Outer Marginal 2 | Lateral I 4      |  |  | 0.2030  |
|  |  | Outer Marginal 2 | Lateral II 4     |  |  | 0.2072  |
|  |  | Lateral I 3      | Lateral I 2      |  |  | 0.1667  |
|  |  | Lateral I 4      | Inner Marginal 4 |  |  | 0.1179  |
|  |  | Lateral II 3     | Inner Marginal 2 |  |  | 0.1360  |
|  |  | Lateral II 3     | Inner Marginal 3 |  |  | 0.1771  |
|  |  | Lateral I 2      | Inner Marginal 1 |  |  | 0.2416  |
|  |  | Lateral II 3     | Inner Marginal 1 |  |  | 0.2416  |
|  |  | Outer Marginal 2 | Lateral I 2      |  |  | 0.2416  |
|  |  | Outer Marginal 3 | Inner Marginal 2 |  |  | 0.3036  |
|  |  | Outer Marginal 4 | Inner Marginal 4 |  |  | 0.1685  |
|  |  | Lateral II 1     | Inner Marginal 4 |  |  | 0.1066  |
|  |  | Lateral II 1     | Lateral I 1      |  |  | 0.1386  |
|  |  | Lateral II 1     | Lateral I 4      |  |  | 0.2994  |
|  |  | Lateral I 1      | Inner Marginal 4 |  |  | 0.1876  |
|  |  | Outer Marginal 3 | Inner Marginal 3 |  |  | 0.4941  |
|  |  | Inner Marginal 2 | Inner Marginal 1 |  |  | 0.3711  |
|  |  | Inner Marginal 3 | Inner Marginal 1 |  |  | 0.3711  |
|  |  | Outer Marginal 2 | Inner Marginal 2 |  |  | 0.3711  |
|  |  | Outer Marginal 2 | Inner Marginal 4 |  |  | 0.2482  |
|  |  | Outer Marginal 2 | Lateral I 1      |  |  | 0.3458  |
|  |  | Lateral I 4      | Lateral I 1      |  |  | 0.5021  |
|  |  | Outer Marginal 2 | Lateral II 1     |  |  | 0.5403  |
|  |  | Outer Marginal 2 | Inner Marginal 3 |  |  | 0.6374  |
|  |  | Outer Marginal 3 | Lateral II 2     |  |  | 0.8070  |
|  |  | Outer Marginal 2 | Lateral II 2     |  |  | 0.8744  |
|  |  | Lateral II 2     | Inner Marginal 2 |  |  | 0.8656  |
|  |  | Lateral II 2     | Inner Marginal 3 |  |  | 0.8656  |
|  |  | Inner Marginal 3 | Inner Marginal 2 |  |  | 1.0000  |
|  |  | Lateral II 1     | Inner Marginal 1 |  |  | 1.0000  |
|  |  | Outer Marginal 2 | Inner Marginal 1 |  |  | 1.0000  |
|  |  | Outer Marginal 2 | Lateral II 3     |  |  | 1.0000  |
|  |  | Outer Marginal 3 | Outer Marginal 2 |  |  | 1.0000  |
|  |  | Outer Marginal 4 | Lateral I 1      |  |  | 1.0000  |
|  |  | Lateral I 4      | Inner Marginal 1 |  |  | 0.7933  |
|  |  | Outer Marginal 4 | Lateral I 4      |  |  | 0.5049  |
|  |  | Inner Marginal 4 | Inner Marginal 1 |  |  | 0.2482  |
|  |  | Lateral I 1      | Inner Marginal 1 |  |  | 0.3458  |
|  |  | Outer Marginal 1 | Lateral I 2      |  |  | 0.4641  |
|  |  | Outer Marginal 4 | Inner Marginal 1 |  |  | 0.3583  |
|  |  | Lateral II 1     | Inner Marginal 2 |  |  | 0.1489  |
|  |  | Lateral II 1     | Inner Marginal 3 |  |  | 0.1489  |
|  |  | Lateral I 3      | Inner Marginal 3 |  |  | 0.2545  |
|  |  | Outer Marginal 4 | Outer Marginal 2 |  |  | 0.2278  |
|  |  | Inner Marginal 4 | Inner Marginal 2 |  |  | 0.0636  |
|  |  | Inner Marginal 4 | Inner Marginal 3 |  |  | 0.0636  |
|  |  | Lateral I 1      | Inner Marginal 2 |  |  | 0.0765  |
|  |  | Lateral I 1      | Inner Marginal 3 |  |  | 0.0765  |
|  |  | Outer Marginal 4 | Lateral II 1     |  |  | 0.1113  |
|  |  | Outer Marginal 3 | Lateral II 3     |  |  | 0.1667  |
|  |  | Lateral II 1     | Lateral I 2      |  |  | 0.0814  |
|  |  | Lateral I 2      | Inner Marginal 3 |  |  | 0.0736  |
|  |  | Outer Marginal 1 | Lateral I 3      |  |  | 0.1413  |
|  |  | Lateral I 2      | Inner Marginal 2 |  |  | 0.0369* |
|  |  | Outer Marginal 4 | Inner Marginal 2 |  |  | 0.0347* |
|  |  | Outer Marginal 4 | Inner Marginal 3 |  |  | 0.0347* |
|  |  | Lateral I 3      | Inner Marginal 2 |  |  | 0.0682  |
|  |  | Outer Marginal 1 | Inner Marginal 3 |  |  | 0.0682  |
|  |  | Lateral II 1     | Lateral I 3      |  |  | 0.0570  |
|  |  | Lateral I 4      | Inner Marginal 2 |  |  | 0.0269* |

|  |  |                  |                  |  |  |  |         |
|--|--|------------------|------------------|--|--|--|---------|
|  |  | Lateral I 4      | Inner Marginal 3 |  |  |  | 0.0269* |
|  |  | Lateral II 4     | Inner Marginal 2 |  |  |  | 0.0275* |
|  |  | Lateral II 4     | Inner Marginal 3 |  |  |  | 0.0275* |
|  |  | Outer Marginal 1 | Lateral II 2     |  |  |  | 0.0788  |
|  |  | Outer Marginal 1 | Inner Marginal 2 |  |  |  | 0.0299* |
|  |  | Lateral II 4     | Lateral II 2     |  |  |  | 0.0506  |
|  |  | Outer Marginal 4 | Lateral I 2      |  |  |  | 0.0117* |
|  |  | Outer Marginal 4 | Lateral II 3     |  |  |  | 0.0117* |
|  |  | Lateral I 4      | Lateral I 2      |  |  |  | 0.0078* |
|  |  | Lateral II 4     | Lateral I 2      |  |  |  | 0.0080* |
|  |  | Lateral II 4     | Lateral II 3     |  |  |  | 0.0080* |
|  |  | Outer Marginal 4 | Lateral II 4     |  |  |  | 0.0077* |
|  |  | Outer Marginal 1 | Lateral II 3     |  |  |  | 0.0058* |
|  |  | Outer Marginal 4 | Lateral I 3      |  |  |  | 0.0056* |
|  |  | Outer Marginal 4 | Outer Marginal 1 |  |  |  | 0.0056* |
|  |  | Outer Marginal 4 | Outer Marginal 3 |  |  |  | 0.0056* |
|  |  | Lateral I 4      | Lateral I 3      |  |  |  | 0.0033* |
|  |  | Lateral II 4     | Lateral I 3      |  |  |  | 0.0034* |
|  |  | Outer Marginal 4 | Lateral II 2     |  |  |  | 0.0032* |
|  |  | Lateral II 4     | Lateral I 4      |  |  |  | 0.0011* |
|  |  | Outer Marginal 3 | Lateral II 4     |  |  |  | 0.0029* |
|  |  | Lateral II 4     | Inner Marginal 1 |  |  |  | 0.0294* |
|  |  | Lateral II 4     | Inner Marginal 4 |  |  |  | 0.0294* |
|  |  | Lateral II 4     | Lateral II 1     |  |  |  | 0.0294* |
|  |  | Lateral II 2     | Lateral I 4      |  |  |  | 0.0047* |
|  |  | Lateral II 4     | Lateral I 1      |  |  |  | 0.1258  |
|  |  | Lateral II 2     | Inner Marginal 4 |  |  |  | 0.0465* |
|  |  | Lateral II 2     | Lateral II 1     |  |  |  | 0.0566  |
|  |  | Lateral II 2     | Inner Marginal 1 |  |  |  | 0.0679  |
|  |  | Outer Marginal 2 | Lateral II 4     |  |  |  | 0.0654  |
|  |  | Lateral II 2     | Lateral I 1      |  |  |  | 0.2030  |
|  |  | Lateral II 2     | Inner Marginal 3 |  |  |  | 0.1315  |
|  |  | Lateral II 2     | Lateral I 2      |  |  |  | 0.1315  |
|  |  | Lateral II 2     | Lateral I 3      |  |  |  | 0.0955  |
|  |  | Lateral II 3     | Lateral I 4      |  |  |  | 0.0195* |
|  |  | Outer Marginal 2 | Lateral I 4      |  |  |  | 0.0195* |
|  |  | Outer Marginal 3 | Lateral I 3      |  |  |  | 0.0200* |
|  |  | Outer Marginal 3 | Lateral I 4      |  |  |  | 0.0195* |
|  |  | Lateral II 3     | Lateral I 3      |  |  |  | 0.0373* |
|  |  | Outer Marginal 2 | Outer Marginal 1 |  |  |  | 0.0304* |
|  |  | Outer Marginal 3 | Outer Marginal 1 |  |  |  | 0.0304* |
|  |  | Lateral II 2     | Inner Marginal 2 |  |  |  | 0.3020  |
|  |  | Lateral I 3      | Inner Marginal 1 |  |  |  | 0.0814  |
|  |  | Lateral I 3      | Inner Marginal 4 |  |  |  | 0.0786  |
|  |  | Lateral II 3     | Inner Marginal 1 |  |  |  | 0.1052  |
|  |  | Lateral II 3     | Inner Marginal 2 |  |  |  | 0.1052  |
|  |  | Lateral II 3     | Inner Marginal 3 |  |  |  | 0.1052  |
|  |  | Lateral II 3     | Inner Marginal 4 |  |  |  | 0.1002  |
|  |  | Lateral II 3     | Lateral I 2      |  |  |  | 0.1052  |
|  |  | Lateral II 3     | Lateral II 1     |  |  |  | 0.1052  |
|  |  | Outer Marginal 2 | Inner Marginal 1 |  |  |  | 0.1052  |
|  |  | Outer Marginal 2 | Inner Marginal 4 |  |  |  | 0.1002  |
|  |  | Outer Marginal 2 | Lateral II 1     |  |  |  | 0.1052  |
|  |  | Outer Marginal 3 | Inner Marginal 1 |  |  |  | 0.1052  |
|  |  | Outer Marginal 3 | Inner Marginal 2 |  |  |  | 0.1052  |
|  |  | Outer Marginal 3 | Inner Marginal 3 |  |  |  | 0.1052  |
|  |  | Outer Marginal 3 | Inner Marginal 4 |  |  |  | 0.1002  |
|  |  | Outer Marginal 3 | Lateral I 2      |  |  |  | 0.1052  |
|  |  | Outer Marginal 3 | Lateral II 1     |  |  |  | 0.1052  |
|  |  | Lateral I 3      | Lateral I 1      |  |  |  | 0.2416  |
|  |  | Lateral II 3     | Lateral II 2     |  |  |  | 0.5238  |
|  |  | Lateral II 3     | Lateral I 1      |  |  |  | 0.2888  |
|  |  | Outer Marginal 1 | Inner Marginal 4 |  |  |  | 0.2188  |
|  |  | Outer Marginal 2 | Lateral I 1      |  |  |  | 0.2888  |
|  |  | Outer Marginal 3 | Lateral I 1      |  |  |  | 0.2888  |
|  |  | Lateral I 4      | Inner Marginal 4 |  |  |  | 0.2854  |
|  |  | Inner Marginal 2 | Inner Marginal 1 |  |  |  | 0.2453  |
|  |  | Lateral I 2      | Inner Marginal 1 |  |  |  | 0.2453  |
|  |  | Lateral I 2      | Inner Marginal 4 |  |  |  | 0.2207  |
|  |  | Outer Marginal 3 | Outer Marginal 2 |  |  |  | 0.3836  |
|  |  | Outer Marginal 1 | Lateral II 1     |  |  |  | 0.4745  |
|  |  | Outer Marginal 2 | Inner Marginal 3 |  |  |  | 0.4875  |
|  |  | Outer Marginal 2 | Lateral I 2      |  |  |  | 0.4875  |
|  |  | Outer Marginal 2 | Lateral I 3      |  |  |  | 0.5403  |
|  |  | Outer Marginal 4 | Inner Marginal 4 |  |  |  | 0.4113  |
|  |  | Lateral I 3      | Inner Marginal 3 |  |  |  | 0.5613  |
|  |  | Lateral I 3      | Lateral I 2      |  |  |  | 0.5613  |
|  |  | Outer Marginal 3 | Lateral II 2     |  |  |  | 0.7499  |
|  |  | Lateral I 1      | Inner Marginal 1 |  |  |  | 0.5403  |
|  |  | Lateral I 1      | Inner Marginal 4 |  |  |  | 0.4795  |
|  |  | Lateral I 2      | Lateral I 1      |  |  |  | 0.5403  |
|  |  | Lateral II 1     | Inner Marginal 4 |  |  |  | 0.6171  |
|  |  | Lateral II 4     | Inner Marginal 3 |  |  |  | 0.9440  |
|  |  | Outer Marginal 1 | Lateral I 4      |  |  |  | 0.9000  |
|  |  | Inner Marginal 3 | Inner Marginal 1 |  |  |  | 1.0000  |
|  |  | Lateral I 1      | Inner Marginal 3 |  |  |  | 1.0000  |
|  |  | Lateral I 2      | Inner Marginal 3 |  |  |  | 1.0000  |
|  |  | Lateral I 4      | Lateral I 1      |  |  |  | 1.0000  |
|  |  | Lateral II 4     | Lateral I 2      |  |  |  | 1.0000  |
|  |  | Outer Marginal 1 | Inner Marginal 1 |  |  |  | 1.0000  |
|  |  | Outer Marginal 1 | Lateral I 1      |  |  |  | 1.0000  |
|  |  | Outer Marginal 2 | Inner Marginal 2 |  |  |  | 1.0000  |
|  |  | Outer Marginal 4 | Lateral II 1     |  |  |  | 1.0000  |
|  |  | Outer Marginal 3 | Lateral II 3     |  |  |  | 0.8852  |

Mg

53.5764

15

&lt;.0001\*

|  |  |                  |                  |  |  |  |         |
|--|--|------------------|------------------|--|--|--|---------|
|  |  | Lateral I 4      | Inner Marginal 1 |  |  |  | 0.8451  |
|  |  | Lateral II 1     | Lateral I 4      |  |  |  | 0.6849  |
|  |  | Lateral I 1      | Inner Marginal 2 |  |  |  | 0.5403  |
|  |  | Lateral II 1     | Lateral I 1      |  |  |  | 0.5403  |
|  |  | Outer Marginal 4 | Lateral I 4      |  |  |  | 0.6072  |
|  |  | Inner Marginal 3 | Inner Marginal 2 |  |  |  | 0.4142  |
|  |  | Lateral I 3      | Inner Marginal 2 |  |  |  | 0.5613  |
|  |  | Outer Marginal 1 | Inner Marginal 3 |  |  |  | 0.4875  |
|  |  | Inner Marginal 4 | Inner Marginal 1 |  |  |  | 0.2207  |
|  |  | Inner Marginal 4 | Inner Marginal 2 |  |  |  | 0.2207  |
|  |  | Inner Marginal 4 | Inner Marginal 3 |  |  |  | 0.2207  |
|  |  | Lateral I 2      | Inner Marginal 2 |  |  |  | 0.2453  |
|  |  | Lateral II 1     | Inner Marginal 1 |  |  |  | 0.2453  |
|  |  | Lateral II 1     | Inner Marginal 2 |  |  |  | 0.2453  |
|  |  | Lateral II 1     | Inner Marginal 3 |  |  |  | 0.2453  |
|  |  | Lateral II 1     | Lateral I 2      |  |  |  | 0.2453  |
|  |  | Outer Marginal 4 | Outer Marginal 1 |  |  |  | 0.3719  |
|  |  | Outer Marginal 2 | Lateral II 2     |  |  |  | 0.5952  |
|  |  | Lateral I 4      | Inner Marginal 3 |  |  |  | 0.3286  |
|  |  | Outer Marginal 2 | Lateral II 3     |  |  |  | 0.3123  |
|  |  | Outer Marginal 4 | Inner Marginal 3 |  |  |  | 0.2403  |
|  |  | Outer Marginal 4 | Lateral I 1      |  |  |  | 0.2765  |
|  |  | Outer Marginal 4 | Inner Marginal 1 |  |  |  | 0.1527  |
|  |  | Outer Marginal 1 | Inner Marginal 2 |  |  |  | 0.1052  |
|  |  | Outer Marginal 1 | Lateral I 2      |  |  |  | 0.1052  |
|  |  | Outer Marginal 4 | Inner Marginal 2 |  |  |  | 0.1002  |
|  |  | Outer Marginal 4 | Lateral I 2      |  |  |  | 0.1002  |
|  |  | Lateral I 4      | Inner Marginal 2 |  |  |  | 0.0786  |
|  |  | Lateral I 4      | Lateral I 2      |  |  |  | 0.0786  |
|  |  | Lateral II 1     | Lateral I 3      |  |  |  | 0.0814  |
|  |  | Outer Marginal 1 | Lateral II 3     |  |  |  | 0.0304* |
|  |  | Outer Marginal 4 | Lateral II 3     |  |  |  | 0.0294* |
|  |  | Outer Marginal 4 | Outer Marginal 2 |  |  |  | 0.0294* |
|  |  | Outer Marginal 4 | Outer Marginal 3 |  |  |  | 0.0294* |
|  |  | Outer Marginal 1 | Lateral I 3      |  |  |  | 0.0200* |
|  |  | Outer Marginal 4 | Lateral I 3      |  |  |  | 0.0195* |
|  |  | Lateral I 4      | Lateral I 3      |  |  |  | 0.0119* |
|  |  | Lateral II 4     | Lateral I 3      |  |  |  | 0.0985  |
|  |  | Outer Marginal 1 | Lateral II 2     |  |  |  | 0.0108* |
|  |  | Outer Marginal 4 | Lateral II 2     |  |  |  | 0.0091* |
|  |  | Lateral II 4     | Inner Marginal 2 |  |  |  | 0.0416* |
|  |  | Lateral II 4     | Lateral II 3     |  |  |  | 0.0029* |
|  |  | Outer Marginal 1 | Lateral II 4     |  |  |  | 0.0029* |
|  |  | Outer Marginal 4 | Lateral II 4     |  |  |  | 0.0029* |
|  |  | Lateral II 4     | Lateral II 2     |  |  |  | 0.0008* |
|  |  | Lateral II 4     | Lateral I 4      |  |  |  | <.0001* |
|  |  | Lateral I 4      | Inner Marginal 4 |  |  |  | <.0001* |
|  |  | Lateral II 4     | Inner Marginal 4 |  |  |  | <.0001* |
|  |  | Lateral II 2     | Inner Marginal 4 |  |  |  | <.0001* |
|  |  | Lateral I 4      | Lateral I 3      |  |  |  | 0.0030* |
|  |  | Outer Marginal 2 | Lateral I 4      |  |  |  | 0.0254* |
|  |  | Outer Marginal 3 | Lateral I 4      |  |  |  | 0.0254* |
|  |  | Lateral II 2     | Lateral I 4      |  |  |  | 0.0025* |
|  |  | Lateral II 4     | Lateral I 3      |  |  |  | 0.0011* |
|  |  | Lateral II 3     | Lateral I 4      |  |  |  | 0.1151  |
|  |  | Lateral II 4     | Inner Marginal 2 |  |  |  | 0.0013* |
|  |  | Lateral II 4     | Inner Marginal 1 |  |  |  | 0.0294* |
|  |  | Lateral II 4     | Lateral I 1      |  |  |  | 0.0294* |
|  |  | Lateral II 4     | Lateral I 2      |  |  |  | 0.0294* |
|  |  | Lateral II 4     | Lateral II 1     |  |  |  | 0.0294* |
|  |  | Lateral II 2     | Lateral I 3      |  |  |  | 0.0022* |
|  |  | Lateral II 4     | Lateral II 2     |  |  |  | 0.0103* |
|  |  | Lateral I 4      | Inner Marginal 1 |  |  |  | 0.1217  |
|  |  | Lateral I 4      | Lateral I 1      |  |  |  | 0.1217  |
|  |  | Lateral I 4      | Lateral I 2      |  |  |  | 0.1217  |
|  |  | Outer Marginal 1 | Inner Marginal 4 |  |  |  | 0.0352* |
|  |  | Outer Marginal 2 | Inner Marginal 4 |  |  |  | 0.0352* |
|  |  | Outer Marginal 3 | Inner Marginal 4 |  |  |  | 0.0352* |
|  |  | Lateral II 2     | Inner Marginal 1 |  |  |  | 0.0502  |
|  |  | Lateral II 2     | Lateral I 1      |  |  |  | 0.0502  |
|  |  | Lateral II 2     | Lateral I 2      |  |  |  | 0.0502  |
|  |  | Lateral II 2     | Lateral II 1     |  |  |  | 0.0502  |
|  |  | Outer Marginal 1 | Lateral I 4      |  |  |  | 0.1685  |
|  |  | Lateral II 3     | Lateral II 2     |  |  |  | 0.1353  |
|  |  | Outer Marginal 3 | Lateral II 2     |  |  |  | 0.0738  |
|  |  | Lateral II 3     | Inner Marginal 4 |  |  |  | 0.1399  |
|  |  | Lateral II 2     | Inner Marginal 2 |  |  |  | 0.0801  |
|  |  | Outer Marginal 2 | Inner Marginal 2 |  |  |  | 0.0460* |
|  |  | Outer Marginal 3 | Inner Marginal 2 |  |  |  | 0.0460* |
|  |  | Inner Marginal 2 | Inner Marginal 1 |  |  |  | 0.0838  |
|  |  | Inner Marginal 3 | Inner Marginal 2 |  |  |  | 0.1643  |
|  |  | Lateral II 3     | Inner Marginal 2 |  |  |  | 0.1643  |
|  |  | Lateral II 4     | Inner Marginal 3 |  |  |  | 0.4747  |
|  |  | Outer Marginal 1 | Lateral I 3      |  |  |  | 0.0786  |
|  |  | Outer Marginal 2 | Lateral I 3      |  |  |  | 0.0786  |
|  |  | Outer Marginal 3 | Lateral I 3      |  |  |  | 0.0786  |
|  |  | Outer Marginal 4 | Lateral I 3      |  |  |  | 0.3393  |
|  |  | Outer Marginal 3 | Lateral II 4     |  |  |  | 0.5270  |
|  |  | Outer Marginal 4 | Inner Marginal 4 |  |  |  | 0.4271  |
|  |  | Lateral II 3     | Lateral I 3      |  |  |  | 0.2348  |
|  |  | Outer Marginal 2 | Lateral II 2     |  |  |  | 0.4954  |
|  |  | Outer Marginal 1 | Inner Marginal 2 |  |  |  | 0.3519  |
|  |  | Outer Marginal 1 | Inner Marginal 1 |  |  |  | 0.2453  |
|  |  | Outer Marginal 1 | Lateral I 1      |  |  |  | 0.2453  |

Si

79.5076

15

&lt;.0001\*

|   |  |                  |                  |         |    |         |         |
|---|--|------------------|------------------|---------|----|---------|---------|
|   |  | Outer Marginal 1 | Lateral I 2      |         |    |         | 0.2453  |
|   |  | Outer Marginal 1 | Lateral II 1     |         |    |         | 0.2453  |
|   |  | Outer Marginal 2 | Inner Marginal 1 |         |    |         | 0.2453  |
|   |  | Outer Marginal 2 | Lateral I 1      |         |    |         | 0.2453  |
|   |  | Outer Marginal 2 | Lateral I 2      |         |    |         | 0.2453  |
|   |  | Outer Marginal 2 | Lateral II 1     |         |    |         | 0.2453  |
|   |  | Outer Marginal 2 | Outer Marginal 1 |         |    |         | 0.2453  |
|   |  | Outer Marginal 3 | Inner Marginal 1 |         |    |         | 0.2453  |
|   |  | Outer Marginal 3 | Lateral I 1      |         |    |         | 0.2453  |
|   |  | Outer Marginal 3 | Lateral I 2      |         |    |         | 0.2453  |
|   |  | Outer Marginal 3 | Lateral II 1     |         |    |         | 0.2453  |
|   |  | Outer Marginal 3 | Outer Marginal 1 |         |    |         | 0.2453  |
|   |  | Outer Marginal 3 | Outer Marginal 2 |         |    |         | 0.2453  |
|   |  | Lateral I 1      | Inner Marginal 4 |         |    |         | 0.6459  |
|   |  | Lateral I 2      | Inner Marginal 4 |         |    |         | 0.6459  |
|   |  | Inner Marginal 3 | Inner Marginal 1 |         |    |         | 0.5403  |
|   |  | Lateral II 3     | Inner Marginal 1 |         |    |         | 0.5403  |
|   |  | Lateral II 3     | Lateral I 1      |         |    |         | 0.5403  |
|   |  | Lateral II 3     | Lateral I 2      |         |    |         | 0.5403  |
|   |  | Lateral II 3     | Lateral II 1     |         |    |         | 0.5403  |
|   |  | Outer Marginal 3 | Inner Marginal 3 |         |    |         | 0.5403  |
|   |  | Lateral II 1     | Lateral I 3      |         |    |         | 0.6933  |
|   |  | Lateral II 1     | Inner Marginal 4 |         |    |         | 0.8545  |
|   |  | Lateral I 1      | Inner Marginal 1 |         |    |         | 1.0000  |
|   |  | Lateral I 2      | Inner Marginal 1 |         |    |         | 1.0000  |
|   |  | Lateral I 2      | Lateral I 1      |         |    |         | 1.0000  |
|   |  | Lateral II 1     | Inner Marginal 1 |         |    |         | 1.0000  |
|   |  | Lateral II 1     | Lateral I 1      |         |    |         | 1.0000  |
|   |  | Lateral II 1     | Lateral I 2      |         |    |         | 1.0000  |
|   |  | Lateral II 3     | Inner Marginal 3 |         |    |         | 1.0000  |
|   |  | Outer Marginal 2 | Inner Marginal 3 |         |    |         | 1.0000  |
|   |  | Outer Marginal 3 | Lateral II 3     |         |    |         | 1.0000  |
|   |  | Lateral I 1      | Inner Marginal 3 |         |    |         | 0.5403  |
|   |  | Lateral I 2      | Inner Marginal 3 |         |    |         | 0.5403  |
|   |  | Lateral II 1     | Inner Marginal 3 |         |    |         | 0.5403  |
|   |  | Outer Marginal 1 | Inner Marginal 3 |         |    |         | 0.5403  |
|   |  | Outer Marginal 1 | Lateral II 3     |         |    |         | 0.5403  |
|   |  | Outer Marginal 2 | Lateral II 3     |         |    |         | 0.5403  |
|   |  | Outer Marginal 4 | Lateral II 1     |         |    |         | 0.8321  |
|   |  | Lateral I 3      | Lateral I 1      |         |    |         | 0.4170  |
|   |  | Lateral I 3      | Lateral I 2      |         |    |         | 0.4170  |
|   |  | Inner Marginal 4 | Inner Marginal 1 |         |    |         | 0.6459  |
|   |  | Outer Marginal 4 | Inner Marginal 1 |         |    |         | 0.6718  |
|   |  | Outer Marginal 4 | Lateral I 1      |         |    |         | 0.6718  |
|   |  | Outer Marginal 4 | Lateral I 2      |         |    |         | 0.6718  |
|   |  | Lateral I 3      | Inner Marginal 1 |         |    |         | 0.3150  |
|   |  | Lateral II 2     | Inner Marginal 3 |         |    |         | 0.6186  |
|   |  | Lateral I 3      | Inner Marginal 3 |         |    |         | 0.2348  |
|   |  | Outer Marginal 1 | Lateral II 2     |         |    |         | 0.4435  |
|   |  | Lateral I 3      | Inner Marginal 4 |         |    |         | 0.3125  |
|   |  | Lateral I 4      | Inner Marginal 2 |         |    |         | 0.2730  |
|   |  | Lateral I 1      | Inner Marginal 2 |         |    |         | 0.0838  |
|   |  | Lateral I 2      | Inner Marginal 2 |         |    |         | 0.0838  |
|   |  | Lateral II 1     | Inner Marginal 2 |         |    |         | 0.0838  |
|   |  | Outer Marginal 2 | Lateral II 4     |         |    |         | 0.2918  |
|   |  | Inner Marginal 4 | Inner Marginal 3 |         |    |         | 0.1399  |
|   |  | Lateral I 3      | Inner Marginal 2 |         |    |         | 0.0062* |
|   |  | Outer Marginal 1 | Lateral II 4     |         |    |         | 0.1219  |
|   |  | Lateral II 1     | Lateral I 4      |         |    |         | 0.1217  |
|   |  | Outer Marginal 4 | Outer Marginal 1 |         |    |         | 0.0567  |
|   |  | Lateral II 4     | Lateral II 3     |         |    |         | 0.1256  |
|   |  | Outer Marginal 4 | Inner Marginal 3 |         |    |         | 0.1237  |
|   |  | Outer Marginal 4 | Lateral II 3     |         |    |         | 0.1237  |
|   |  | Outer Marginal 4 | Outer Marginal 2 |         |    |         | 0.0287* |
|   |  | Outer Marginal 4 | Outer Marginal 3 |         |    |         | 0.0287* |
|   |  | Inner Marginal 4 | Inner Marginal 2 |         |    |         | 0.0002* |
|   |  | Lateral I 4      | Inner Marginal 3 |         |    |         | 0.1151  |
|   |  | Outer Marginal 4 | Inner Marginal 2 |         |    |         | 0.0007* |
|   |  | Outer Marginal 4 | Lateral I 4      |         |    |         | 0.0004* |
|   |  | Outer Marginal 4 | Lateral II 2     |         |    |         | <.0001* |
|   |  | Outer Marginal 4 | Lateral II 4     |         |    |         | <.0001* |
|   |  | Lateral II 2     | Lateral I 4      |         |    |         | <.0001* |
|   |  | Lateral II 2     | Lateral I 3      |         |    |         | 0.0007* |
|   |  | Lateral II 2     | Inner Marginal 4 |         |    |         | 0.0010* |
|   |  | Lateral II 3     | Lateral II 2     |         |    |         | 0.0024* |
|   |  | Lateral II 2     | Lateral I 2      |         |    |         | 0.0035* |
|   |  | Lateral II 2     | Lateral II 1     |         |    |         | 0.0342* |
|   |  | Lateral II 2     | Inner Marginal 1 |         |    |         | 0.0385* |
|   |  | Lateral II 2     | Lateral I 1      |         |    |         | 0.0186* |
|   |  | Lateral II 3     | Lateral I 4      |         |    |         | 0.0009* |
|   |  | Lateral II 2     | Inner Marginal 3 |         |    |         | 0.1875  |
|   |  | Lateral I 4      | Inner Marginal 1 |         |    |         | 0.0271* |
|   |  | Lateral II 4     | Lateral I 3      |         |    |         | 0.0024* |
|   |  | Lateral II 4     | Inner Marginal 1 |         |    |         | 0.0294* |
|   |  | Lateral II 4     | Lateral II 1     |         |    |         | 0.0294* |
|   |  | Lateral II 4     | Lateral I 1      |         |    |         | 0.0162* |
|   |  | Lateral II 4     | Lateral I 2      |         |    |         | 0.0093* |
|   |  | Lateral I 4      | Lateral I 3      |         |    |         | 0.0118* |
|   |  | Lateral I 4      | Lateral I 1      |         |    |         | 0.0344* |
|   |  | Lateral II 4     | Lateral I 4      |         |    |         | 0.0207* |
|   |  | Lateral II 4     | Inner Marginal 4 |         |    |         | 0.0177* |
|   |  | Outer Marginal 4 | Lateral II 1     |         |    |         | 0.0412* |
|   |  | Outer Marginal 4 | Inner Marginal 1 |         |    |         | 0.0613  |
|   |  | Lateral I 4      | Lateral I 2      |         |    |         | 0.0731  |
| P |  |                  |                  | 62.0254 | 11 | <.0001* |         |



|   |  |                  |                  |         |    |         |         |
|---|--|------------------|------------------|---------|----|---------|---------|
|   |  | Lateral II 3     | Inner Marginal 4 |         |    |         | 0.0058* |
|   |  | Lateral II 3     | Lateral I 3      |         |    |         | 0.0056* |
|   |  | Lateral II 3     | Lateral I 2      |         |    |         | 0.0122* |
|   |  | Outer Marginal 4 | Lateral I 1      |         |    |         | 0.1213  |
|   |  | Outer Marginal 4 | Lateral I 3      |         |    |         | 0.1122  |
|   |  | Inner Marginal 4 | Inner Marginal 1 |         |    |         | 0.0570  |
|   |  | Lateral I 3      | Inner Marginal 1 |         |    |         | 0.0550  |
|   |  | Lateral I 4      | Inner Marginal 4 |         |    |         | 0.2252  |
|   |  | Lateral II 3     | Lateral I 1      |         |    |         | 0.0369* |
|   |  | Lateral II 4     | Inner Marginal 3 |         |    |         | 0.4750  |
|   |  | Lateral I 2      | Inner Marginal 1 |         |    |         | 0.0814  |
|   |  | Lateral II 3     | Inner Marginal 1 |         |    |         | 0.0814  |
|   |  | Lateral II 3     | Lateral II 1     |         |    |         | 0.0814  |
|   |  | Outer Marginal 4 | Lateral I 2      |         |    |         | 0.3485  |
|   |  | Lateral II 3     | Inner Marginal 3 |         |    |         | 0.2416  |
|   |  | Lateral I 1      | Inner Marginal 1 |         |    |         | 0.1489  |
|   |  | Outer Marginal 4 | Inner Marginal 4 |         |    |         | 0.7811  |
|   |  | Inner Marginal 3 | Inner Marginal 1 |         |    |         | 0.5403  |
|   |  | Lateral I 2      | Lateral I 1      |         |    |         | 0.8793  |
|   |  | Lateral I 3      | Lateral I 1      |         |    |         | 0.9067  |
|   |  | Lateral I 4      | Inner Marginal 3 |         |    |         | 1.0000  |
|   |  | Outer Marginal 4 | Inner Marginal 3 |         |    |         | 1.0000  |
|   |  | Lateral I 3      | Lateral I 2      |         |    |         | 0.8687  |
|   |  | Lateral II 1     | Inner Marginal 3 |         |    |         | 0.5403  |
|   |  | Lateral II 1     | Inner Marginal 1 |         |    |         | 0.4142  |
|   |  | Inner Marginal 4 | Inner Marginal 3 |         |    |         | 0.6625  |
|   |  | Lateral I 2      | Inner Marginal 3 |         |    |         | 0.5582  |
|   |  | Lateral I 1      | Inner Marginal 3 |         |    |         | 0.3711  |
|   |  | Lateral II 1     | Lateral I 1      |         |    |         | 0.1489  |
|   |  | Lateral I 2      | Inner Marginal 4 |         |    |         | 0.2903  |
|   |  | Lateral I 3      | Inner Marginal 3 |         |    |         | 0.3770  |
|   |  | Lateral I 1      | Inner Marginal 4 |         |    |         | 0.1715  |
|   |  | Lateral II 1     | Lateral I 2      |         |    |         | 0.0814  |
|   |  | Lateral I 3      | Inner Marginal 4 |         |    |         | 0.1404  |
|   |  | Lateral II 1     | Inner Marginal 4 |         |    |         | 0.0570  |
|   |  | Lateral II 1     | Lateral I 3      |         |    |         | 0.0550  |
|   |  | Outer Marginal 4 | Lateral I 4      |         |    |         | 0.1855  |
|   |  | Outer Marginal 4 | Lateral II 4     |         |    |         | 0.0117* |
|   |  | Lateral II 4     | Lateral II 2     |         |    |         | 0.0282* |
|   |  | Outer Marginal 4 | Lateral II 3     |         |    |         | 0.0016* |
|   |  | Lateral II 1     | Lateral I 4      |         |    |         | 0.0271* |
|   |  | Lateral II 4     | Lateral II 3     |         |    |         | 0.0011* |
|   |  | Outer Marginal 4 | Lateral II 2     |         |    |         | <.0001* |
|   |  | Lateral II 2     | Lateral I 4      |         |    |         | <.0001* |
|   |  | Outer Marginal 2 | Lateral I 4      |         |    |         | 0.0002* |
|   |  | Lateral II 3     | Lateral I 4      |         |    |         | 0.0008* |
|   |  | Lateral II 2     | Lateral I 3      |         |    |         | 0.0031* |
|   |  | Outer Marginal 3 | Lateral I 4      |         |    |         | 0.0010* |
|   |  | Outer Marginal 2 | Lateral II 4     |         |    |         | 0.0002* |
|   |  | Lateral II 2     | Lateral I 2      |         |    |         | 0.0066* |
|   |  | Lateral II 2     | Inner Marginal 4 |         |    |         | 0.0024* |
|   |  | Outer Marginal 4 | Outer Marginal 1 |         |    |         | 0.0002* |
|   |  | Lateral II 4     | Lateral I 4      |         |    |         | 0.0014* |
|   |  | Lateral II 2     | Lateral I 1      |         |    |         | 0.0102* |
|   |  | Lateral II 2     | Lateral II 1     |         |    |         | 0.0120* |
|   |  | Lateral II 3     | Lateral II 2     |         |    |         | 0.0165* |
|   |  | Lateral II 2     | Inner Marginal 1 |         |    |         | 0.0262* |
|   |  | Outer Marginal 2 | Inner Marginal 4 |         |    |         | 0.0006* |
|   |  | Lateral II 3     | Inner Marginal 4 |         |    |         | 0.0019* |
|   |  | Outer Marginal 3 | Lateral II 4     |         |    |         | 0.0083* |
|   |  | Outer Marginal 3 | Inner Marginal 4 |         |    |         | 0.0078* |
|   |  | Outer Marginal 4 | Lateral I 4      |         |    |         | 0.0465* |
|   |  | Outer Marginal 2 | Outer Marginal 1 |         |    |         | 0.0022* |
|   |  | Outer Marginal 3 | Outer Marginal 1 |         |    |         | 0.0022* |
|   |  | Lateral I 4      | Lateral I 2      |         |    |         | 0.0891  |
|   |  | Lateral II 4     | Lateral I 2      |         |    |         | 0.0523  |
|   |  | Outer Marginal 4 | Lateral I 2      |         |    |         | 0.0575  |
|   |  | Lateral II 3     | Lateral I 3      |         |    |         | 0.0057* |
|   |  | Outer Marginal 2 | Lateral I 1      | 88.3610 | 15 | <.0001* | 0.0058* |
|   |  | Outer Marginal 2 | Lateral II 1     |         |    |         | 0.0058* |
|   |  | Outer Marginal 2 | Lateral I 3      |         |    |         | 0.0105* |
|   |  | Outer Marginal 3 | Lateral I 3      |         |    |         | 0.0105* |
|   |  | Inner Marginal 2 | Inner Marginal 1 |         |    |         | 0.0157* |
|   |  | Outer Marginal 2 | Inner Marginal 1 |         |    |         | 0.0149* |
|   |  | Outer Marginal 2 | Lateral I 2      |         |    |         | 0.0149* |
|   |  | Outer Marginal 3 | Lateral I 2      |         |    |         | 0.0149* |
|   |  | Lateral II 4     | Lateral I 1      |         |    |         | 0.1266  |
|   |  | Lateral II 4     | Lateral I 3      |         |    |         | 0.1163  |
|   |  | Outer Marginal 4 | Lateral I 3      |         |    |         | 0.1160  |
|   |  | Lateral II 3     | Inner Marginal 1 |         |    |         | 0.0122* |
|   |  | Lateral II 3     | Lateral I 1      |         |    |         | 0.0122* |
|   |  | Lateral II 3     | Lateral II 1     |         |    |         | 0.0122* |
|   |  | Outer Marginal 3 | Lateral I 1      |         |    |         | 0.0230* |
|   |  | Outer Marginal 3 | Lateral II 1     |         |    |         | 0.0230* |
|   |  | Lateral II 4     | Lateral II 1     |         |    |         | 0.1371  |
|   |  | Outer Marginal 3 | Inner Marginal 1 |         |    |         | 0.0513  |
|   |  | Lateral I 4      | Lateral I 3      |         |    |         | 0.2444  |
|   |  | Inner Marginal 3 | Inner Marginal 1 |         |    |         | 0.0947  |
|   |  | Outer Marginal 4 | Lateral I 1      |         |    |         | 0.3216  |
|   |  | Outer Marginal 4 | Lateral II 1     |         |    |         | 0.3636  |
|   |  | Lateral II 3     | Inner Marginal 3 |         |    |         | 0.2101  |
|   |  | Outer Marginal 3 | Lateral II 2     |         |    |         | 0.6198  |
|   |  | Lateral II 3     | Inner Marginal 2 |         |    |         | 0.4208  |
| S |  |                  |                  |         |    |         |         |



|  |                  |                  |  |  |  |         |
|--|------------------|------------------|--|--|--|---------|
|  | Outer Marginal 2 | Lateral II 3     |  |  |  | 0.0552  |
|  | Outer Marginal 3 | Lateral II 4     |  |  |  | 0.2160  |
|  | Lateral II 2     | Inner Marginal 2 |  |  |  | 0.3157  |
|  | Outer Marginal 2 | Lateral I 1      |  |  |  | 0.0828  |
|  | Lateral II 2     | Lateral I 3      |  |  |  | 0.3667  |
|  | Lateral I 3      | Lateral I 1      |  |  |  | 0.1432  |
|  | Outer Marginal 3 | Lateral I 2      |  |  |  | 0.1432  |
|  | Outer Marginal 3 | Lateral II 3     |  |  |  | 0.1417  |
|  | Outer Marginal 2 | Inner Marginal 2 |  |  |  | 0.2195  |
|  | Outer Marginal 3 | Lateral I 1      |  |  |  | 0.1931  |
|  | Outer Marginal 3 | Lateral I 3      |  |  |  | 0.2491  |
|  | Lateral I 2      | Lateral I 1      |  |  |  | 0.2101  |
|  | Outer Marginal 2 | Lateral I 3      |  |  |  | 0.2833  |
|  | Outer Marginal 1 | Lateral I 4      |  |  |  | 0.5794  |
|  | Outer Marginal 3 | Inner Marginal 2 |  |  |  | 0.4166  |
|  | Outer Marginal 2 | Inner Marginal 1 |  |  |  | 0.3662  |
|  | Outer Marginal 2 | Lateral II 1     |  |  |  | 0.3662  |
|  | Lateral I 3      | Lateral I 2      |  |  |  | 0.4118  |
|  | Inner Marginal 2 | Inner Marginal 1 |  |  |  | 0.4740  |
|  | Inner Marginal 3 | Inner Marginal 1 |  |  |  | 0.3725  |
|  | Lateral I 3      | Inner Marginal 1 |  |  |  | 0.4928  |
|  | Outer Marginal 3 | Inner Marginal 1 |  |  |  | 0.4928  |
|  | Outer Marginal 3 | Lateral II 1     |  |  |  | 0.4928  |
|  | Outer Marginal 2 | Lateral II 2     |  |  |  | 0.7262  |
|  | Lateral II 3     | Lateral I 1      |  |  |  | 0.5309  |
|  | Outer Marginal 4 | Inner Marginal 4 |  |  |  | 0.7097  |
|  | Lateral I 2      | Inner Marginal 1 |  |  |  | 0.5510  |
|  | Lateral II 4     | Lateral I 2      |  |  |  | 0.7411  |
|  | Inner Marginal 3 | Inner Marginal 2 |  |  |  | 0.6700  |
|  | Lateral II 4     | Lateral II 3     |  |  |  | 0.7726  |
|  | Lateral II 4     | Lateral I 1      |  |  |  | 0.8365  |
|  | Lateral II 3     | Inner Marginal 1 |  |  |  | 0.7656  |
|  | Lateral II 3     | Lateral II 1     |  |  |  | 0.7656  |
|  | Lateral I 3      | Inner Marginal 2 |  |  |  | 0.9538  |
|  | Lateral I 1      | Inner Marginal 1 |  |  |  | 1.0000  |
|  | Outer Marginal 2 | Inner Marginal 3 |  |  |  | 1.0000  |
|  | Outer Marginal 3 | Lateral II 2     |  |  |  | 1.0000  |
|  | Lateral II 4     | Inner Marginal 1 |  |  |  | 0.9554  |
|  | Lateral II 4     | Lateral II 1     |  |  |  | 0.9554  |
|  | Lateral II 4     | Lateral I 3      |  |  |  | 0.9467  |
|  | Lateral II 1     | Lateral I 1      |  |  |  | 0.8793  |
|  | Lateral II 2     | Inner Marginal 3 |  |  |  | 0.9408  |
|  | Lateral II 1     | Inner Marginal 1 |  |  |  | 0.8248  |
|  | Outer Marginal 3 | Outer Marginal 2 |  |  |  | 0.8301  |
|  | Lateral I 2      | Inner Marginal 2 |  |  |  | 0.8260  |
|  | Outer Marginal 3 | Inner Marginal 3 |  |  |  | 0.7758  |
|  | Outer Marginal 1 | Lateral II 1     |  |  |  | 0.6445  |
|  | Lateral II 1     | Lateral I 2      |  |  |  | 0.5510  |
|  | Lateral II 4     | Inner Marginal 2 |  |  |  | 0.6905  |
|  | Lateral I 3      | Inner Marginal 3 |  |  |  | 0.5064  |
|  | Lateral II 1     | Lateral I 3      |  |  |  | 0.4928  |
|  | Outer Marginal 1 | Inner Marginal 1 |  |  |  | 0.4928  |
|  | Lateral II 1     | Inner Marginal 3 |  |  |  | 0.3725  |
|  | Lateral II 1     | Inner Marginal 2 |  |  |  | 0.4740  |
|  | Lateral II 3     | Lateral I 2      |  |  |  | 0.2963  |
|  | Lateral II 3     | Inner Marginal 3 |  |  |  | 0.2683  |
|  | Outer Marginal 1 | Lateral I 1      |  |  |  | 0.3265  |
|  | Lateral I 2      | Inner Marginal 3 |  |  |  | 0.1761  |
|  | Lateral I 1      | Inner Marginal 3 |  |  |  | 0.1099  |
|  | Lateral II 3     | Inner Marginal 2 |  |  |  | 0.1834  |
|  | Lateral II 3     | Lateral I 3      |  |  |  | 0.1432  |
|  | Lateral I 1      | Inner Marginal 2 |  |  |  | 0.1238  |
|  | Outer Marginal 1 | Lateral II 3     |  |  |  | 0.1038  |
|  | Outer Marginal 4 | Lateral I 4      |  |  |  | 0.3151  |
|  | Lateral II 4     | Inner Marginal 3 |  |  |  | 0.2770  |
|  | Outer Marginal 1 | Lateral II 4     |  |  |  | 0.2161  |
|  | Outer Marginal 4 | Outer Marginal 1 |  |  |  | 0.1499  |
|  | Lateral I 4      | Lateral I 1      |  |  |  | 0.2208  |
|  | Outer Marginal 4 | Lateral II 1     |  |  |  | 0.1975  |
|  | Inner Marginal 4 | Inner Marginal 1 |  |  |  | 0.1114  |
|  | Lateral I 4      | Inner Marginal 1 |  |  |  | 0.2725  |
|  | Outer Marginal 1 | Inner Marginal 3 |  |  |  | 0.0176* |
|  | Outer Marginal 1 | Lateral I 2      |  |  |  | 0.0115* |
|  | Outer Marginal 4 | Inner Marginal 1 |  |  |  | 0.1304  |
|  | Lateral II 4     | Lateral II 2     |  |  |  | 0.1074  |
|  | Outer Marginal 1 | Lateral I 3      |  |  |  | 0.0039* |
|  | Outer Marginal 1 | Inner Marginal 2 |  |  |  | 0.0045* |
|  | Outer Marginal 4 | Lateral I 1      |  |  |  | 0.0315* |
|  | Lateral II 3     | Lateral II 2     |  |  |  | 0.0631  |
|  | Inner Marginal 4 | Inner Marginal 3 |  |  |  | 0.0062* |
|  | Outer Marginal 4 | Lateral II 4     |  |  |  | 0.0088* |
|  | Outer Marginal 4 | Lateral II 3     |  |  |  | 0.0033* |
|  | Inner Marginal 4 | Inner Marginal 2 |  |  |  | 0.0004* |
|  | Outer Marginal 4 | Inner Marginal 3 |  |  |  | 0.0029* |
|  | Lateral I 4      | Inner Marginal 3 |  |  |  | 0.0094* |
|  | Lateral I 4      | Lateral I 2      |  |  |  | 0.0059* |
|  | Outer Marginal 4 | Lateral I 2      |  |  |  | 0.0011* |
|  | Outer Marginal 4 | Outer Marginal 3 |  |  |  | 0.0006* |
|  | Outer Marginal 4 | Outer Marginal 2 |  |  |  | 0.0005* |
|  | Lateral I 4      | Inner Marginal 2 |  |  |  | 0.0010* |
|  | Outer Marginal 4 | Lateral I 3      |  |  |  | 0.0002* |
|  | Lateral I 4      | Lateral I 3      |  |  |  | 0.0009* |
|  | Outer Marginal 4 | Inner Marginal 2 |  |  |  | <.0001* |
|  | Outer Marginal 1 | Lateral II 2     |  |  |  | 0.0008* |

|                  |                  |                  |         |    |         |         |
|------------------|------------------|------------------|---------|----|---------|---------|
| K                | Outer Marginal 4 | Lateral II 2     | 4.3690  | 3  | 0.2243  | <.0001* |
|                  | Outer Marginal 2 | Lateral II 2     |         |    |         | 0.3711  |
|                  | Lateral II 2     | Inner Marginal 2 |         |    |         | 0.5408  |
|                  | Inner Marginal 3 | Inner Marginal 2 |         |    |         | 0.5403  |
|                  | Outer Marginal 2 | Inner Marginal 2 |         |    |         | 0.5403  |
|                  | Outer Marginal 2 | Inner Marginal 3 |         |    |         | 1.0000  |
|                  | Lateral II 2     | Inner Marginal 3 |         |    |         | 0.1797  |
|                  | Lateral II 2     | Lateral I 1      |         |    |         | 0.0137* |
|                  | Lateral I 4      | Lateral I 2      |         |    |         | 0.0031* |
|                  | Lateral I 4      | Lateral I 1      |         |    |         | 0.0059* |
| Ca               | Lateral II 4     | Lateral I 2      | 65.0009 | 15 | <.0001* | 0.0011* |
|                  | Lateral II 2     | Lateral I 2      |         |    |         | 0.0141* |
|                  | Lateral II 4     | Inner Marginal 4 |         |    |         | 0.0012* |
|                  | Lateral II 4     | Lateral I 1      |         |    |         | 0.0029* |
|                  | Lateral II 4     | Lateral I 3      |         |    |         | 0.0015* |
|                  | Outer Marginal 4 | Outer Marginal 1 |         |    |         | 0.0017* |
|                  | Lateral II 4     | Lateral I 4      |         |    |         | 0.0108* |
|                  | Outer Marginal 2 | Lateral II 2     |         |    |         | 0.0233* |
|                  | Lateral II 4     | Lateral II 3     |         |    |         | 0.0057* |
|                  | Lateral II 4     | Lateral II 2     |         |    |         | 0.0211* |
|                  | Lateral II 4     | Lateral II 1     |         |    |         | 0.0094* |
|                  | Lateral I 4      | Lateral I 3      |         |    |         | 0.0160* |
|                  | Outer Marginal 2 | Lateral I 4      |         |    |         | 0.0186* |
|                  | Outer Marginal 4 | Lateral I 2      |         |    |         | 0.0104* |
|                  | Lateral II 4     | Inner Marginal 1 |         |    |         | 0.0118* |
|                  | Outer Marginal 4 | Lateral I 1      |         |    |         | 0.0159* |
|                  | Lateral II 2     | Lateral II 1     |         |    |         | 0.0758  |
|                  | Outer Marginal 2 | Inner Marginal 4 |         |    |         | 0.0035* |
|                  | Outer Marginal 2 | Lateral I 3      |         |    |         | 0.0022* |
|                  | Outer Marginal 2 | Outer Marginal 1 |         |    |         | 0.0022* |
|                  | Outer Marginal 3 | Outer Marginal 1 |         |    |         | 0.0021* |
|                  | Lateral II 2     | Lateral I 3      |         |    |         | 0.0933  |
|                  | Outer Marginal 4 | Lateral I 3      |         |    |         | 0.0382* |
|                  | Outer Marginal 2 | Inner Marginal 2 |         |    |         | 0.0065* |
|                  | Outer Marginal 4 | Lateral II 1     |         |    |         | 0.0653  |
|                  | Lateral I 4      | Inner Marginal 4 |         |    |         | 0.0794  |
|                  | Lateral I 4      | Inner Marginal 1 |         |    |         | 0.1100  |
|                  | Outer Marginal 2 | Inner Marginal 1 |         |    |         | 0.0058* |
|                  | Outer Marginal 2 | Lateral I 2      |         |    |         | 0.0058* |
|                  | Outer Marginal 2 | Lateral II 3     |         |    |         | 0.0057* |
|                  | Outer Marginal 3 | Lateral I 2      |         |    |         | 0.0057* |
|                  | Lateral II 4     | Inner Marginal 2 |         |    |         | 0.0617  |
|                  | Outer Marginal 3 | Lateral I 3      |         |    |         | 0.0105* |
|                  | Outer Marginal 2 | Lateral I 1      |         |    |         | 0.0106* |
|                  | Outer Marginal 2 | Lateral II 1     |         |    |         | 0.0107* |
|                  | Outer Marginal 3 | Lateral I 1      |         |    |         | 0.0104* |
|                  | Outer Marginal 3 | Lateral II 3     |         |    |         | 0.0145* |
|                  | Outer Marginal 4 | Lateral II 3     |         |    |         | 0.1071  |
|                  | Outer Marginal 3 | Lateral II 2     |         |    |         | 0.1936  |
|                  | Outer Marginal 3 | Lateral II 1     |         |    |         | 0.0294* |
|                  | Lateral II 4     | Inner Marginal 3 |         |    |         | 0.1729  |
|                  | Outer Marginal 4 | Inner Marginal 1 |         |    |         | 0.1729  |
|                  | Outer Marginal 2 | Inner Marginal 3 |         |    |         | 0.0416* |
|                  | Lateral II 2     | Inner Marginal 4 |         |    |         | 0.2752  |
|                  | Outer Marginal 3 | Inner Marginal 4 |         |    |         | 0.1386  |
|                  | Lateral II 3     | Lateral I 1      |         |    |         | 0.0358* |
|                  | Outer Marginal 3 | Inner Marginal 1 |         |    |         | 0.0735  |
|                  | Lateral II 2     | Inner Marginal 1 |         |    |         | 0.3861  |
|                  | Lateral II 3     | Lateral I 2      |         |    |         | 0.0593  |
|                  | Outer Marginal 3 | Inner Marginal 2 |         |    |         | 0.1626  |
| Outer Marginal 4 | Inner Marginal 4 | 0.3174           |         |    |         |         |
| Lateral I 3      | Lateral I 1      | 0.1839           |         |    |         |         |
| Inner Marginal 2 | Inner Marginal 1 | 0.2716           |         |    |         |         |
| Inner Marginal 3 | Inner Marginal 1 | 0.2087           |         |    |         |         |
| Lateral I 3      | Lateral I 2      | 0.2523           |         |    |         |         |
| Inner Marginal 3 | Inner Marginal 2 | 0.3035           |         |    |         |         |
| Lateral II 3     | Lateral II 1     | 0.2683           |         |    |         |         |
| Lateral I 4      | Inner Marginal 2 | 0.5930           |         |    |         |         |
| Lateral II 3     | Lateral I 3      | 0.5152           |         |    |         |         |
| Inner Marginal 4 | Inner Marginal 1 | 0.6348           |         |    |         |         |
| Outer Marginal 3 | Lateral I 4      | 0.8899           |         |    |         |         |
| Outer Marginal 4 | Lateral II 2     | 0.9011           |         |    |         |         |
| Lateral I 2      | Lateral I 1      | 0.8049           |         |    |         |         |
| Lateral II 3     | Inner Marginal 4 | 0.9579           |         |    |         |         |
| Lateral II 1     | Lateral I 1      | 1.0000           |         |    |         |         |
| Lateral II 3     | Inner Marginal 1 | 1.0000           |         |    |         |         |
| Outer Marginal 1 | Lateral II 1     | 0.9244           |         |    |         |         |
| Lateral II 1     | Lateral I 2      | 0.9025           |         |    |         |         |
| Outer Marginal 3 | Inner Marginal 3 | 0.8699           |         |    |         |         |
| Outer Marginal 4 | Inner Marginal 2 | 0.8783           |         |    |         |         |
| Outer Marginal 2 | Lateral II 4     | 0.8673           |         |    |         |         |
| Lateral I 3      | Inner Marginal 1 | 0.6842           |         |    |         |         |
| Outer Marginal 1 | Lateral I 1      | 0.6335           |         |    |         |         |
| Lateral I 4      | Inner Marginal 3 | 0.7083           |         |    |         |         |
| Lateral II 1     | Lateral I 3      | 0.5083           |         |    |         |         |
| Lateral II 2     | Inner Marginal 2 | 0.6948           |         |    |         |         |
| Lateral I 3      | Inner Marginal 4 | 0.5254           |         |    |         |         |
| Outer Marginal 1 | Lateral I 2      | 0.3709           |         |    |         |         |
| Lateral II 2     | Lateral I 4      | 0.6121           |         |    |         |         |
| Lateral I 2      | Inner Marginal 1 | 0.2963           |         |    |         |         |
| Outer Marginal 4 | Outer Marginal 3 | 0.4827           |         |    |         |         |
| Lateral II 1     | Inner Marginal 1 | 0.2187           |         |    |         |         |
| Lateral I 1      | Inner Marginal 1 | 0.1761           |         |    |         |         |
| Inner Marginal 4 | Inner Marginal 2 | 0.2627           |         |    |         |         |

|              |  |                  |                  |          |    |         |         |
|--------------|--|------------------|------------------|----------|----|---------|---------|
|              |  | Lateral II 1     | Inner Marginal 2 |          |    |         | 0.1060  |
|              |  | Outer Marginal 4 | Lateral I 4      |          |    |         | 0.2783  |
|              |  | Lateral II 1     | Inner Marginal 3 |          |    |         | 0.0365* |
|              |  | Outer Marginal 1 | Inner Marginal 1 |          |    |         | 0.0614  |
|              |  | Outer Marginal 4 | Inner Marginal 3 |          |    |         | 0.2003  |
|              |  | Inner Marginal 4 | Inner Marginal 3 |          |    |         | 0.1257  |
|              |  | Lateral I 3      | Inner Marginal 2 |          |    |         | 0.0726  |
|              |  | Lateral II 1     | Inner Marginal 4 |          |    |         | 0.1290  |
|              |  | Outer Marginal 3 | Lateral II 4     |          |    |         | 0.1707  |
|              |  | Lateral I 1      | Inner Marginal 3 |          |    |         | 0.0189* |
|              |  | Lateral II 2     | Inner Marginal 3 |          |    |         | 0.2983  |
|              |  | Lateral II 3     | Inner Marginal 2 |          |    |         | 0.0475* |
|              |  | Lateral I 2      | Inner Marginal 4 |          |    |         | 0.1015  |
|              |  | Lateral II 3     | Inner Marginal 3 |          |    |         | 0.0208* |
|              |  | Outer Marginal 1 | Lateral I 3      |          |    |         | 0.0474* |
|              |  | Lateral II 3     | Lateral II 2     |          |    |         | 0.2597  |
|              |  | Lateral I 2      | Inner Marginal 3 |          |    |         | 0.0119* |
|              |  | Lateral I 3      | Inner Marginal 3 |          |    |         | 0.0147* |
|              |  | Lateral I 1      | Inner Marginal 4 |          |    |         | 0.0592  |
|              |  | Outer Marginal 1 | Lateral II 3     |          |    |         | 0.0092* |
|              |  | Lateral I 1      | Inner Marginal 2 |          |    |         | 0.0082* |
|              |  | Outer Marginal 1 | Inner Marginal 3 |          |    |         | 0.0057* |
|              |  | Outer Marginal 3 | Outer Marginal 2 |          |    |         | 0.0059* |
|              |  | Lateral I 2      | Inner Marginal 2 |          |    |         | 0.0043* |
|              |  | Lateral II 3     | Lateral I 4      |          |    |         | 0.0614  |
|              |  | Outer Marginal 1 | Inner Marginal 4 |          |    |         | 0.0086* |
|              |  | Outer Marginal 1 | Inner Marginal 2 |          |    |         | 0.0014* |
|              |  | Lateral II 1     | Lateral I 4      |          |    |         | 0.0362* |
|              |  | Outer Marginal 4 | Lateral II 4     |          |    |         | 0.0063* |
|              |  | Outer Marginal 4 | Outer Marginal 2 |          |    |         | 0.0019* |
|              |  | Outer Marginal 1 | Lateral II 4     |          |    |         | 0.0002* |
|              |  | Outer Marginal 1 | Lateral I 4      |          |    |         | 0.0004* |
|              |  | Outer Marginal 1 | Lateral II 2     |          |    |         | 0.0013* |
| Fe           |  | Lateral II 2     | Lateral II 1     | 5.0775   | 2  | 0.0790  | 0.0514  |
|              |  | Lateral II 4     | Lateral II 1     |          |    |         | 0.0654  |
|              |  | Lateral II 4     | Lateral II 2     |          |    |         | 0.3106  |
|              |  | Lateral II 2     | Lateral I 4      |          |    |         | <.0001* |
|              |  | Lateral II 2     | Inner Marginal 4 |          |    |         | <.0001* |
|              |  | Lateral II 2     | Lateral I 1      |          |    |         | 0.0009* |
|              |  | Lateral II 2     | Lateral II 1     |          |    |         | 0.0009* |
|              |  | Lateral II 4     | Lateral I 4      |          |    |         | <.0001* |
|              |  | Outer Marginal 3 | Lateral I 4      |          |    |         | 0.0002* |
|              |  | Lateral II 4     | Inner Marginal 4 |          |    |         | <.0001* |
|              |  | Lateral II 2     | Inner Marginal 1 |          |    |         | 0.0029* |
|              |  | Lateral II 3     | Lateral I 4      |          |    |         | 0.0008* |
|              |  | Lateral II 2     | Lateral I 2      |          |    |         | 0.0043* |
|              |  | Lateral II 2     | Lateral I 3      |          |    |         | 0.0076* |
|              |  | Lateral II 4     | Inner Marginal 1 |          |    |         | 0.0011* |
|              |  | Lateral II 4     | Lateral I 1      |          |    |         | 0.0011* |
|              |  | Lateral II 4     | Lateral II 1     |          |    |         | 0.0011* |
|              |  | Lateral II 4     | Lateral I 2      |          |    |         | 0.0020* |
|              |  | Lateral II 4     | Lateral I 3      |          |    |         | 0.0019* |
|              |  | Lateral II 3     | Lateral II 2     |          |    |         | 0.0225* |
|              |  | Outer Marginal 3 | Inner Marginal 4 |          |    |         | 0.0004* |
|              |  | Lateral II 2     | Inner Marginal 2 |          |    |         | 0.0177* |
|              |  | Outer Marginal 2 | Lateral I 4      |          |    |         | 0.0118* |
|              |  | Lateral II 3     | Inner Marginal 4 |          |    |         | 0.0019* |
|              |  | Outer Marginal 2 | Inner Marginal 4 |          |    |         | 0.0020* |
|              |  | Outer Marginal 4 | Outer Marginal 1 |          |    |         | 0.0075* |
|              |  | Lateral II 2     | Inner Marginal 3 |          |    |         | 0.0734  |
|              |  | Lateral I 4      | Lateral I 1      |          |    |         | 0.0488* |
|              |  | Outer Marginal 2 | Outer Marginal 1 |          |    |         | 0.0021* |
|              |  | Outer Marginal 3 | Lateral I 3      |          |    |         | 0.0022* |
|              |  | Outer Marginal 3 | Outer Marginal 1 |          |    |         | 0.0022* |
| All elements |  | Lateral I 3      | Inner Marginal 4 | 105.9252 | 15 | <.0001* | 0.0126* |
|              |  | Lateral II 3     | Inner Marginal 2 |          |    |         | 0.0043* |
|              |  | Outer Marginal 4 | Lateral I 1      |          |    |         | 0.0575  |
|              |  | Inner Marginal 2 | Inner Marginal 1 |          |    |         | 0.0068* |
|              |  | Lateral II 3     | Lateral I 3      |          |    |         | 0.0058* |
|              |  | Outer Marginal 2 | Inner Marginal 1 |          |    |         | 0.0057* |
|              |  | Outer Marginal 2 | Lateral I 1      |          |    |         | 0.0057* |
|              |  | Outer Marginal 2 | Lateral II 1     |          |    |         | 0.0056* |
|              |  | Outer Marginal 3 | Inner Marginal 1 |          |    |         | 0.0058* |
|              |  | Outer Marginal 3 | Lateral I 1      |          |    |         | 0.0058* |
|              |  | Outer Marginal 3 | Lateral I 2      |          |    |         | 0.0058* |
|              |  | Outer Marginal 3 | Lateral II 1     |          |    |         | 0.0057* |
|              |  | Lateral I 3      | Lateral I 1      |          |    |         | 0.0094* |
|              |  | Outer Marginal 2 | Lateral I 2      |          |    |         | 0.0092* |
|              |  | Outer Marginal 2 | Lateral I 3      |          |    |         | 0.0213* |
|              |  | Outer Marginal 4 | Lateral II 1     |          |    |         | 0.1265  |
|              |  | Inner Marginal 3 | Inner Marginal 1 |          |    |         | 0.0122* |
|              |  | Lateral II 3     | Inner Marginal 1 |          |    |         | 0.0122* |
|              |  | Lateral II 3     | Inner Marginal 3 |          |    |         | 0.0122* |
|              |  | Lateral II 3     | Lateral I 1      |          |    |         | 0.0122* |
|              |  | Lateral II 3     | Lateral I 2      |          |    |         | 0.0122* |
|              |  | Lateral II 3     | Lateral II 1     |          |    |         | 0.0119* |
|              |  | Lateral I 3      | Inner Marginal 1 |          |    |         | 0.0230* |
|              |  | Outer Marginal 3 | Inner Marginal 2 |          |    |         | 0.0562  |
|              |  | Lateral I 2      | Lateral I 1      |          |    |         | 0.0601  |
|              |  | Lateral I 3      | Lateral I 2      |          |    |         | 0.1044  |
|              |  | Lateral I 4      | Inner Marginal 4 |          |    |         | 0.3402  |
|              |  | Lateral II 4     | Inner Marginal 2 |          |    |         | 0.3123  |
|              |  | Outer Marginal 4 | Inner Marginal 1 |          |    |         | 0.3423  |
|              |  | Lateral I 4      | Inner Marginal 1 |          |    |         | 0.4148  |

|  |                  |                  |  |  |  |         |
|--|------------------|------------------|--|--|--|---------|
|  | Outer Marginal 3 | Outer Marginal 2 |  |  |  | 0.2496  |
|  | Outer Marginal 4 | Inner Marginal 4 |  |  |  | 0.4299  |
|  | Lateral I 4      | Lateral I 2      |  |  |  | 0.6588  |
|  | Lateral I 2      | Inner Marginal 1 |  |  |  | 0.4034  |
|  | Lateral II 1     | Lateral I 1      |  |  |  | 0.4020  |
|  | Lateral I 2      | Inner Marginal 4 |  |  |  | 0.5618  |
|  | Inner Marginal 3 | Inner Marginal 2 |  |  |  | 0.6084  |
|  | Lateral II 4     | Inner Marginal 3 |  |  |  | 0.7726  |
|  | Inner Marginal 4 | Inner Marginal 1 |  |  |  | 0.7920  |
|  | Outer Marginal 3 | Inner Marginal 3 |  |  |  | 1.0000  |
|  | Outer Marginal 4 | Lateral I 2      |  |  |  | 1.0000  |
|  | Outer Marginal 2 | Inner Marginal 2 |  |  |  | 0.9538  |
|  | Outer Marginal 2 | Lateral II 4     |  |  |  | 0.7132  |
|  | Outer Marginal 3 | Lateral II 4     |  |  |  | 0.7133  |
|  | Lateral II 1     | Inner Marginal 1 |  |  |  | 0.4020  |
|  | Lateral I 4      | Lateral I 3      |  |  |  | 0.6381  |
|  | Outer Marginal 2 | Inner Marginal 3 |  |  |  | 0.4160  |
|  | Outer Marginal 1 | Lateral I 1      |  |  |  | 0.3709  |
|  | Lateral I 1      | Inner Marginal 1 |  |  |  | 0.1437  |
|  | Lateral II 1     | Lateral I 2      |  |  |  | 0.0937  |
|  | Lateral II 1     | Inner Marginal 4 |  |  |  | 0.2249  |
|  | Outer Marginal 4 | Lateral I 4      |  |  |  | 0.3395  |
|  | Outer Marginal 1 | Lateral II 1     |  |  |  | 0.0509  |
|  | Lateral I 1      | Inner Marginal 4 |  |  |  | 0.1021  |
|  | Outer Marginal 1 | Inner Marginal 1 |  |  |  | 0.0348* |
|  | Lateral I 1      | Inner Marginal 3 |  |  |  | 0.0122* |
|  | Lateral I 2      | Inner Marginal 3 |  |  |  | 0.0122* |
|  | Lateral II 1     | Inner Marginal 3 |  |  |  | 0.0119* |
|  | Outer Marginal 2 | Lateral II 3     |  |  |  | 0.0228* |
|  | Lateral II 1     | Lateral I 4      |  |  |  | 0.1636  |
|  | Outer Marginal 1 | Lateral I 2      |  |  |  | 0.0149* |
|  | Lateral II 4     | Lateral II 2     |  |  |  | 0.1550  |
|  | Outer Marginal 2 | Lateral II 2     |  |  |  | 0.1633  |
|  | Lateral II 1     | Lateral I 3      |  |  |  | 0.0092* |
|  | Lateral I 2      | Inner Marginal 2 |  |  |  | 0.0104* |
|  | Lateral I 3      | Inner Marginal 2 |  |  |  | 0.0128* |
|  | Lateral I 3      | Inner Marginal 3 |  |  |  | 0.0058* |
|  | Outer Marginal 1 | Inner Marginal 3 |  |  |  | 0.0058* |
|  | Outer Marginal 1 | Lateral II 3     |  |  |  | 0.0058* |
|  | Outer Marginal 3 | Lateral II 3     |  |  |  | 0.0058* |
|  | Outer Marginal 1 | Inner Marginal 4 |  |  |  | 0.0250* |
|  | Lateral I 1      | Inner Marginal 2 |  |  |  | 0.0043* |
|  | Lateral II 1     | Inner Marginal 2 |  |  |  | 0.0043* |
|  | Outer Marginal 4 | Lateral I 3      |  |  |  | 0.0353* |
|  | Outer Marginal 1 | Lateral I 3      |  |  |  | 0.0033* |
|  | Outer Marginal 3 | Lateral II 2     |  |  |  | 0.0689  |
|  | Outer Marginal 1 | Inner Marginal 2 |  |  |  | 0.0015* |
|  | Inner Marginal 4 | Inner Marginal 3 |  |  |  | 0.0019* |
|  | Inner Marginal 4 | Inner Marginal 2 |  |  |  | 0.0008* |
|  | Outer Marginal 1 | Lateral I 4      |  |  |  | 0.0052* |
|  | Lateral II 4     | Lateral II 3     |  |  |  | 0.0020* |
|  | Outer Marginal 4 | Inner Marginal 2 |  |  |  | 0.0011* |
|  | Outer Marginal 4 | Inner Marginal 3 |  |  |  | 0.0011* |
|  | Outer Marginal 4 | Lateral II 3     |  |  |  | 0.0011* |
|  | Outer Marginal 4 | Outer Marginal 2 |  |  |  | 0.0005* |
|  | Outer Marginal 4 | Outer Marginal 3 |  |  |  | 0.0002* |
|  | Outer Marginal 1 | Lateral II 4     |  |  |  | 0.0002* |
|  | Lateral I 4      | Inner Marginal 2 |  |  |  | 0.0009* |
|  | Lateral I 4      | Inner Marginal 3 |  |  |  | 0.0013* |
|  | Outer Marginal 1 | Lateral II 2     |  |  |  | <.0001* |
|  | Outer Marginal 4 | Lateral II 4     |  |  |  | <.0001* |
|  | Outer Marginal 4 | Lateral II 2     |  |  |  | <.0001* |
